# Supplementary material for: Identify Novel Targeting Sites of Calcineurin and CaMKII in Human Cav3.2 T-type Calcium Channel
Source: Preprints.org preprint supplement (doi:10.20944/preprints202308.1114.v2), 2023-10-20

Figure S1. Approach for identifying calcineurin-dephosphorylated residues on Cav3.2 T-type calcium channel.

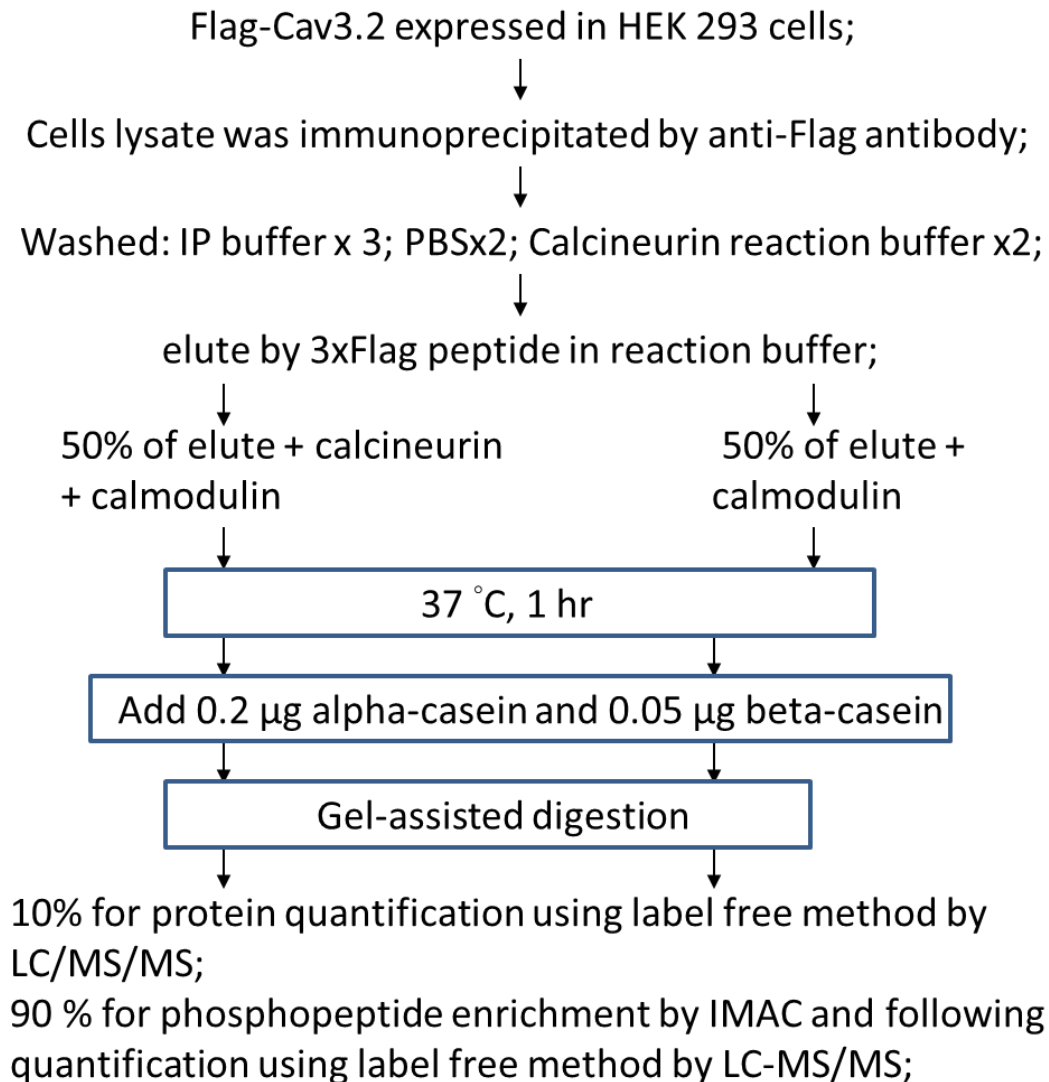

Figure S2. Mascot search results of MSMS spectra

# 1\_MS/MS Fragmentation of **VPLGAPPPGPAALVGASPESPGAPGR**

Found in **O95180**, Voltage-dependent T-type calcium channel subunit alpha-1H OS=Homo sapiens GN=CACNA1H PE=1 SV=4

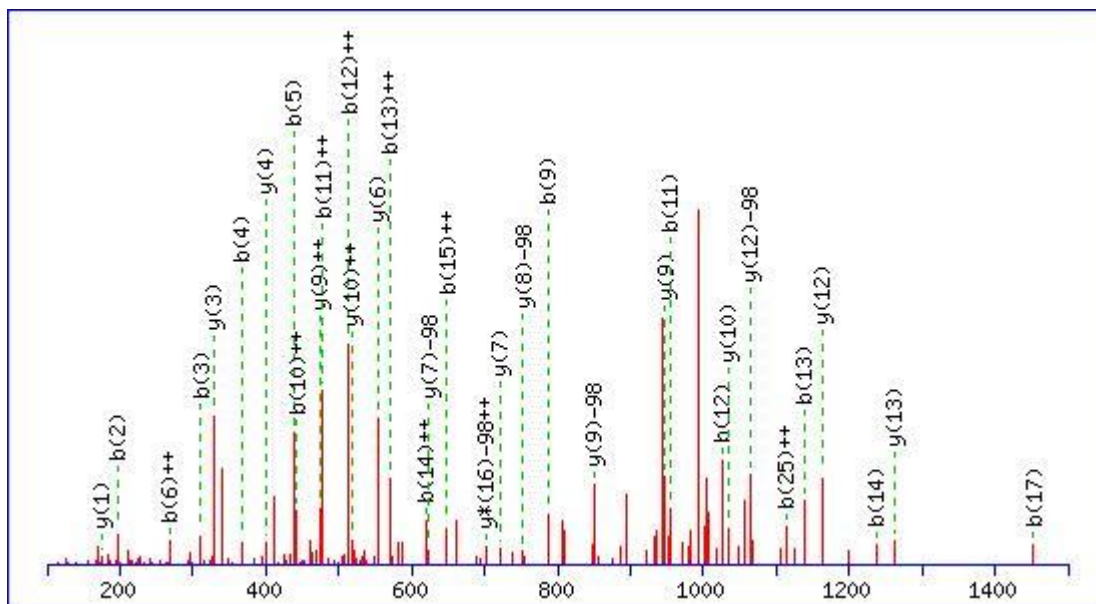

Monoisotopic mass of neutral peptide Mr(calc): 2398.2046

Variable modifications:

S20 : Phospho (ST), with neutral losses 0.0000(shown in table), 97.9769

Ions Score: 70 Expect: 0.00026

Matches : 34/344 fragment ions using 57 most intense peaks ([help](#))

| #  | b         | b <sup>++</sup> | b <sup>0</sup> | b <sup>0++</sup> | Seq. | y         | y <sup>++</sup> | y <sup>*</sup> | y <sup>*++</sup> | y <sup>0</sup> | y <sup>0++</sup> | #  |
|----|-----------|-----------------|----------------|------------------|------|-----------|-----------------|----------------|------------------|----------------|------------------|----|
| 1  | 100.0757  | 50.5415         |                |                  | V    |           |                 |                |                  |                |                  | 26 |
| 2  | 197.1285  | 99.0679         |                |                  | P    | 2300.1435 | 1150.5754       | 2283.1169      | 1142.0621        | 2282.1329      | 1141.5701        | 25 |
| 3  | 310.2125  | 155.6099        |                |                  | L    | 2203.0907 | 1102.0490       | 2186.0642      | 1093.5357        | 2185.0801      | 1093.0437        | 24 |
| 4  | 367.2340  | 184.1206        |                |                  | G    | 2090.0066 | 1045.5070       | 2072.9801      | 1036.9937        | 2071.9961      | 1036.5017        | 23 |
| 5  | 438.2711  | 219.6392        |                |                  | A    | 2032.9852 | 1016.9962       | 2015.9586      | 1008.4830        | 2014.9746      | 1007.9909        | 22 |
| 6  | 535.3239  | 268.1656        |                |                  | P    | 1961.9481 | 981.4777        | 1944.9215      | 972.9644         | 1943.9375      | 972.4724         | 21 |
| 7  | 632.3766  | 316.6920        |                |                  | P    | 1864.8953 | 932.9513        | 1847.8688      | 924.4380         | 1846.8847      | 923.9460         | 20 |
| 8  | 729.4294  | 365.2183        |                |                  | P    | 1767.8425 | 884.4249        | 1750.8160      | 875.9116         | 1749.8320      | 875.4196         | 19 |
| 9  | 786.4509  | 393.7291        |                |                  | G    | 1670.7898 | 835.8985        | 1653.7632      | 827.3853         | 1652.7792      | 826.8932         | 18 |
| 10 | 883.5036  | 442.2554        |                |                  | P    | 1613.7683 | 807.3878        | 1596.7418      | 798.8745         | 1595.7577      | 798.3825         | 17 |
| 11 | 954.5407  | 477.7740        |                |                  | A    | 1516.7156 | 758.8614        | 1499.6890      | 750.3481         | 1498.7050      | 749.8561         | 16 |
| 12 | 1025.5778 | 513.2926        |                |                  | A    | 1445.6784 | 723.3429        | 1428.6519      | 714.8296         | 1427.6679      | 714.3376         | 15 |
| 13 | 1138.6619 | 569.8346        |                |                  | L    | 1374.6413 | 687.8243        | 1357.6148      | 679.3110         | 1356.6308      | 678.8190         | 14 |
| 14 | 1237.7303 | 619.3688        |                |                  | V    | 1261.5573 | 631.2823        | 1244.5307      | 622.7690         | 1243.5467      | 622.2770         | 13 |
| 15 | 1294.7518 | 647.8795        |                |                  | G    | 1162.4888 | 581.7481        | 1145.4623      | 573.2348         | 1144.4783      | 572.7428         | 12 |
| 16 | 1365.7889 | 683.3981        |                |                  | A    | 1105.4674 | 553.2373        | 1088.4408      | 544.7241         | 1087.4568      | 544.2320         | 11 |
| 17 | 1452.8209 | 726.9141        | 1434.8104      | 717.9088         | S    | 1034.4303 | 517.7188        | 1017.4037      | 509.2055         | 1016.4197      | 508.7135         | 10 |

|    |           |           |           |           |   |          |          |          |          |          |          |   |
|----|-----------|-----------|-----------|-----------|---|----------|----------|----------|----------|----------|----------|---|
| 18 | 1549.8737 | 775.4405  | 1531.8631 | 766.4352  | P | 947.3982 | 474.2028 | 930.3717 | 465.6895 | 929.3877 | 465.1975 | 9 |
| 19 | 1678.9163 | 839.9618  | 1660.9057 | 830.9565  | E | 850.3455 | 425.6764 | 833.3189 | 417.1631 | 832.3349 | 416.6711 | 8 |
| 20 | 1845.9146 | 923.4610  | 1827.9041 | 914.4557  | S | 721.3029 | 361.1551 | 704.2763 | 352.6418 | 703.2923 | 352.1498 | 7 |
| 21 | 1942.9674 | 971.9873  | 1924.9568 | 962.9821  | P | 554.3045 | 277.6559 | 537.2780 | 269.1426 |          |          | 6 |
| 22 | 1999.9889 | 1000.4981 | 1981.9783 | 991.4928  | G | 457.2518 | 229.1295 | 440.2252 | 220.6162 |          |          | 5 |
| 23 | 2071.0260 | 1036.0166 | 2053.0154 | 1027.0113 | A | 400.2303 | 200.6188 | 383.2037 | 192.1055 |          |          | 4 |
| 24 | 2168.0788 | 1084.5430 | 2150.0682 | 1075.5377 | P | 329.1932 | 165.1002 | 312.1666 | 156.5870 |          |          | 3 |
| 25 | 2225.1002 | 1113.0537 | 2207.0896 | 1104.0485 | G | 232.1404 | 116.5738 | 215.1139 | 108.0606 |          |          | 2 |
| 26 |           |           |           |           | R | 175.1190 | 88.0631  | 158.0924 | 79.5498  |          |          | 1 |

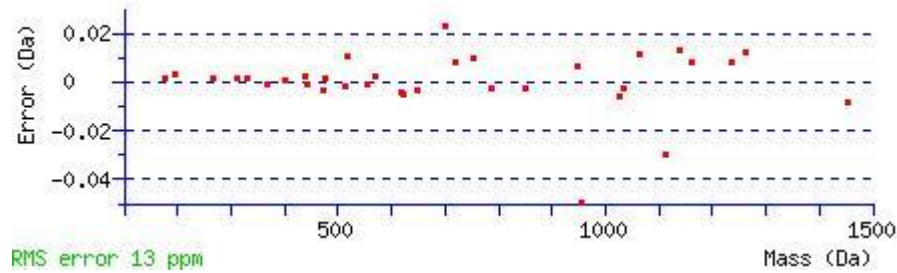

2\_MS/MS Fragmentation of **VPLGAPPPGPAALVGASPESPGAPGR**  
Found in **O95180**, Voltage-dependent T-type calcium channel subunit alpha-1H OS=Homo sapiens GN=CACNA1H PE=1 SV=4

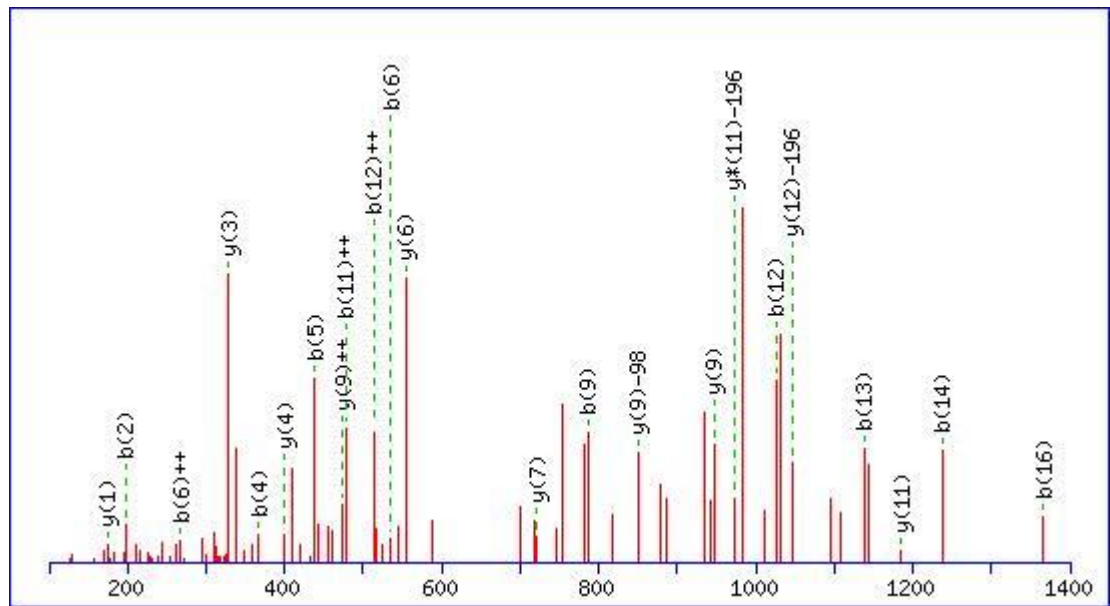

Monoisotopic mass of neutral peptide Mr(calc): 2478.1709

Variable modifications:

S17 : Phospho (ST), with neutral losses 0.0000(shown in table), 97.9769

S20 : Phospho (ST), with neutral losses 0.0000(shown in table), 97.9769

Ions Score: 48 Expect: 0.044

Matches : 23/356 fragment ions using 50 most intense peaks ([help](#))

| #  | b         | b <sup>++</sup> | b <sup>0</sup> | b <sup>0++</sup> | Seq. | y         | y <sup>++</sup> | y <sup>*</sup> | y <sup>***</sup> | y <sup>0</sup> | y <sup>0++</sup> | #  |
|----|-----------|-----------------|----------------|------------------|------|-----------|-----------------|----------------|------------------|----------------|------------------|----|
| 1  | 100.0757  | 50.5415         |                |                  | V    |           |                 |                |                  |                |                  | 26 |
| 2  | 197.1285  | 99.0679         |                |                  | P    | 2380.1098 | 1190.5585       | 2363.0833      | 1182.0453        | 2362.0992      | 1181.5533        | 25 |
| 3  | 310.2125  | 155.6099        |                |                  | L    | 2283.0570 | 1142.0322       | 2266.0305      | 1133.5189        | 2265.0465      | 1133.0269        | 24 |
| 4  | 367.2340  | 184.1206        |                |                  | G    | 2169.9730 | 1085.4901       | 2152.9464      | 1076.9769        | 2151.9624      | 1076.4848        | 23 |
| 5  | 438.2711  | 219.6392        |                |                  | A    | 2112.9515 | 1056.9794       | 2095.9250      | 1048.4661        | 2094.9409      | 1047.9741        | 22 |
| 6  | 535.3239  | 268.1656        |                |                  | P    | 2041.9144 | 1021.4608       | 2024.8879      | 1012.9476        | 2023.9038      | 1012.4556        | 21 |
| 7  | 632.3766  | 316.6920        |                |                  | P    | 1944.8616 | 972.9345        | 1927.8351      | 964.4212         | 1926.8511      | 963.9292         | 20 |
| 8  | 729.4294  | 365.2183        |                |                  | P    | 1847.8089 | 924.4081        | 1830.7823      | 915.8948         | 1829.7983      | 915.4028         | 19 |
| 9  | 786.4509  | 393.7291        |                |                  | G    | 1750.7561 | 875.8817        | 1733.7296      | 867.3684         | 1732.7455      | 866.8764         | 18 |
| 10 | 883.5036  | 442.2554        |                |                  | P    | 1693.7346 | 847.3710        | 1676.7081      | 838.8577         | 1675.7241      | 838.3657         | 17 |
| 11 | 954.5407  | 477.7740        |                |                  | A    | 1596.6819 | 798.8446        | 1579.6553      | 790.3313         | 1578.6713      | 789.8393         | 16 |
| 12 | 1025.5778 | 513.2926        |                |                  | A    | 1525.6448 | 763.3260        | 1508.6182      | 754.8127         | 1507.6342      | 754.3207         | 15 |
| 13 | 1138.6619 | 569.8346        |                |                  | L    | 1454.6077 | 727.8075        | 1437.5811      | 719.2942         | 1436.5971      | 718.8022         | 14 |
| 14 | 1237.7303 | 619.3688        |                |                  | V    | 1341.5236 | 671.2654        | 1324.4970      | 662.7522         | 1323.5130      | 662.2602         | 13 |
| 15 | 1294.7518 | 647.8795        |                |                  | G    | 1242.4552 | 621.7312        | 1225.4286      | 613.2180         | 1224.4446      | 612.7259         | 12 |
| 16 | 1365.7889 | 683.3981        |                |                  | A    | 1185.4337 | 593.2205        | 1168.4072      | 584.7072         | 1167.4231      | 584.2152         | 11 |
| 17 | 1532.7873 | 766.8973        | 1514.7767      | 757.8920         | S    | 1114.3966 | 557.7019        | 1097.3700      | 549.1887         | 1096.3860      | 548.6967         | 10 |

|    |           |           |           |           |   |          |          |          |          |          |          |   |
|----|-----------|-----------|-----------|-----------|---|----------|----------|----------|----------|----------|----------|---|
| 18 | 1629.8400 | 815.4236  | 1611.8295 | 806.4184  | P | 947.3982 | 474.2028 | 930.3717 | 465.6895 | 929.3877 | 465.1975 | 9 |
| 19 | 1758.8826 | 879.9449  | 1740.8721 | 870.9397  | E | 850.3455 | 425.6764 | 833.3189 | 417.1631 | 832.3349 | 416.6711 | 8 |
| 20 | 1925.8810 | 963.4441  | 1907.8704 | 954.4388  | S | 721.3029 | 361.1551 | 704.2763 | 352.6418 | 703.2923 | 352.1498 | 7 |
| 21 | 2022.9337 | 1011.9705 | 2004.9232 | 1002.9652 | P | 554.3045 | 277.6559 | 537.2780 | 269.1426 |          |          | 6 |
| 22 | 2079.9552 | 1040.4812 | 2061.9446 | 1031.4760 | G | 457.2518 | 229.1295 | 440.2252 | 220.6162 |          |          | 5 |
| 23 | 2150.9923 | 1075.9998 | 2132.9818 | 1066.9945 | A | 400.2303 | 200.6188 | 383.2037 | 192.1055 |          |          | 4 |
| 24 | 2248.0451 | 1124.5262 | 2230.0345 | 1115.5209 | P | 329.1932 | 165.1002 | 312.1666 | 156.5870 |          |          | 3 |
| 25 | 2305.0665 | 1153.0369 | 2287.0560 | 1144.0316 | G | 232.1404 | 116.5738 | 215.1139 | 108.0606 |          |          | 2 |
| 26 |           |           |           |           | R | 175.1190 | 88.0631  | 158.0924 | 79.5498  |          |          | 1 |

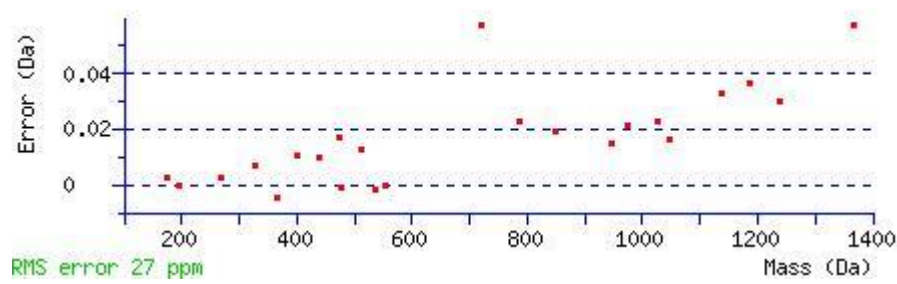

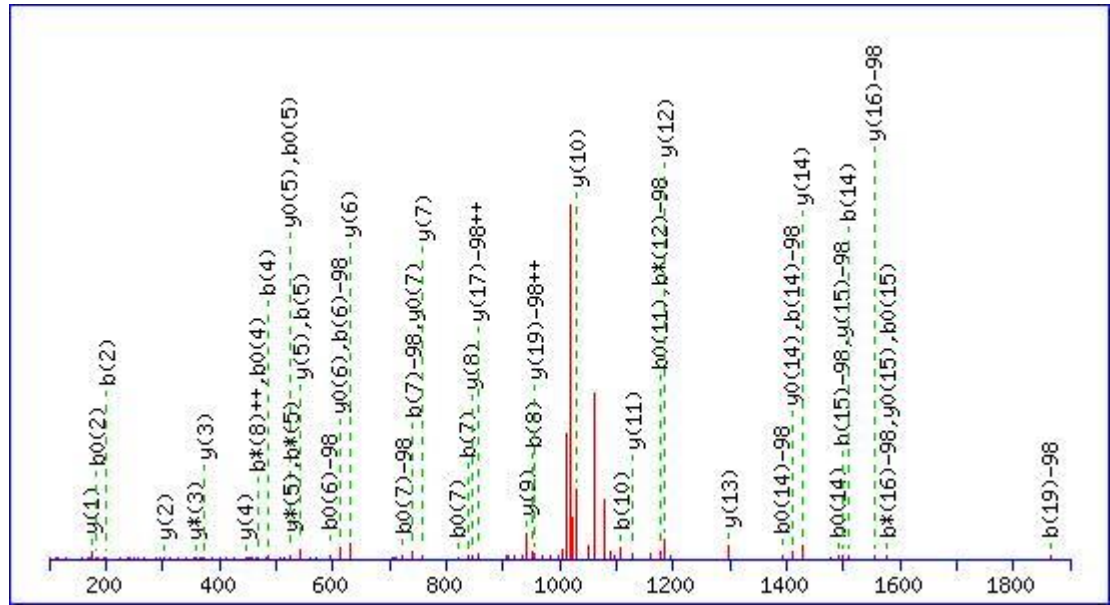

Monoisotopic mass of neutral peptide Mr(calc): 2136.9324

Variable modifications:

S6 : Phospho (ST), with neutral losses 97.9769(shown in table), 0.0000

Ions Score: 133 Expect: 1.3e-010

Matches : 51/334 fragment ions using 52 most intense peaks ([help](#))

| # | b        | b <sup>++</sup> | b <sup>*</sup> | b <sup>*++</sup> | b <sup>0</sup> | b <sup>0++</sup> | Seq | y         | y <sup>++</sup> | y <sup>*</sup> | y <sup>*++</sup> | y <sup>0</sup> | y <sup>0++</sup> | #  |
|---|----------|-----------------|----------------|------------------|----------------|------------------|-----|-----------|-----------------|----------------|------------------|----------------|------------------|----|
| 1 | 130.0499 | 65.5286         |                |                  | 112.0393       | 56.5233          | E   |           |                 |                |                  |                |                  | 20 |
| 2 | 201.0870 | 101.0471        |                |                  | 183.0764       | 92.0418          | A   | 1910.9203 | 955.9638        | 1893.8937      | 947.4505         | 1892.9097      | 946.9585         | 19 |
| 3 | 330.1296 | 165.5684        |                |                  | 312.1190       | 156.5631         | E   | 1839.8831 | 920.4452        | 1822.8566      | 911.9319         | 1821.8726      | 911.4399         | 18 |
| 4 | 486.2307 | 243.6190        | 469.2041       | 235.1057         | 468.2201       | 234.6137         | R   | 1710.8406 | 855.9239        | 1693.8140      | 847.4106         | 1692.8300      | 846.9186         | 17 |
| 5 | 543.2522 | 272.1297        | 526.2256       | 263.6164         | 525.2416       | 263.1244         | G   | 1554.7394 | 777.8734        | 1537.7129      | 769.3601         | 1536.7289      | 768.8681         | 16 |
| 6 | 612.2736 | 306.6404        | 595.2471       | 298.1272         | 594.2630       | 297.6352         | S   | 1497.7180 | 749.3626        | 1480.6914      | 740.8494         | 1479.7074      | 740.3573         | 15 |
| 7 | 741.3162 | 371.1617        | 724.2897       | 362.6485         | 723.3056       | 362.1565         | E   | 1428.6965 | 714.8519        | 1411.6700      | 706.3386         | 1410.6859      | 705.8466         | 14 |
| 8 | 854.4003 | 427.7038        | 837.3737       | 419.1905         | 836.3897       | 418.6985         | L   | 1299.6539 | 650.3306        | 1282.6274      | 641.8173         | 1281.6434      | 641.3253         | 13 |
| 9 | 911.4217 | 456.2145        | 894.3952       | 447.7012         | 893.4112       | 447.2092         | G   | 1186.5699 | 593.7886        | 1169.5433      | 585.2753         | 1168.5593      | 584.7833         | 12 |

|    |           |          |           |          |           |          |   |           |          |           |          |           |          |    |
|----|-----------|----------|-----------|----------|-----------|----------|---|-----------|----------|-----------|----------|-----------|----------|----|
| 10 | 1010.4901 | 505.7487 | 993.4636  | 497.2354 | 992.4796  | 496.7434 | V | 1129.5484 | 565.2778 | 1112.5218 | 556.7646 | 1111.5378 | 556.2726 | 11 |
| 11 | 1097.5222 | 549.2647 | 1080.4956 | 540.7515 | 1079.5116 | 540.2594 | S | 1030.4800 | 515.7436 | 1013.4534 | 507.2304 | 1012.4694 | 506.7383 | 10 |
| 12 | 1194.5749 | 597.7911 | 1177.5484 | 589.2778 | 1176.5644 | 588.7858 | P | 943.4480  | 472.2276 | 926.4214  | 463.7143 | 925.4374  | 463.2223 | 9  |
| 13 | 1281.6070 | 641.3071 | 1264.5804 | 632.7938 | 1263.5964 | 632.3018 | S | 846.3952  | 423.7012 | 829.3686  | 415.1880 | 828.3846  | 414.6959 | 8  |
| 14 | 1410.6496 | 705.8284 | 1393.6230 | 697.3151 | 1392.6390 | 696.8231 | E | 759.3632  | 380.1852 | 742.3366  | 371.6719 | 741.3526  | 371.1799 | 7  |
| 15 | 1497.6815 | 749.3444 | 1480.6550 | 740.8312 | 1479.6710 | 740.3392 | S | 630.3206  | 315.6639 | 613.2940  | 307.1506 | 612.3100  | 306.6586 | 6  |
| 16 | 1594.7344 | 797.8708 | 1577.7078 | 789.3575 | 1576.7238 | 788.8655 | P | 543.2885  | 272.1479 | 526.2620  | 263.6346 | 525.2780  | 263.1426 | 5  |
| 17 | 1665.7715 | 833.3894 | 1648.7449 | 824.8761 | 1647.7609 | 824.3841 | A | 446.2358  | 223.6215 | 429.2092  | 215.1083 | 428.2252  | 214.6162 | 4  |
| 18 | 1736.8086 | 868.9079 | 1719.7820 | 860.3947 | 1718.7980 | 859.9026 | A | 375.1987  | 188.1030 | 358.1721  | 179.5897 | 357.1881  | 179.0977 | 3  |
| 19 | 1865.8519 | 933.4292 | 1848.8246 | 924.9160 | 1847.8406 | 924.4239 | E | 304.1615  | 152.5844 | 287.1350  | 144.0711 | 286.1510  | 143.5791 | 2  |
| 20 |           |          |           |          |           |          | R | 175.1190  | 88.0631  | 158.0924  | 79.5498  |           |          | 1  |

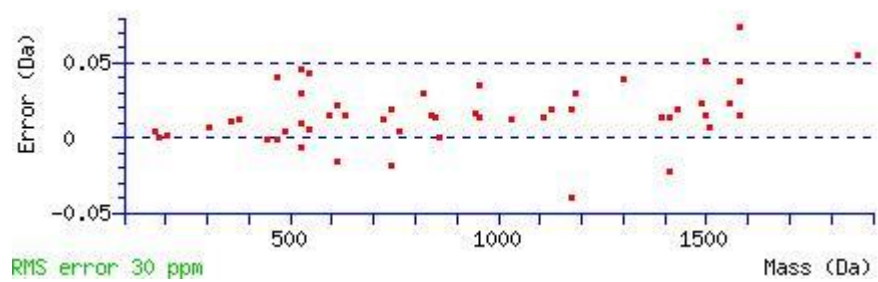

4\_MS/MS Fragmentation of **GSELGVSPSPSPAER**

Found in **O95180**, Voltage-dependent T-type calcium channel subunit alpha-1H OS=Homo sapiens GN=CACNA1H PE=1 SV=4

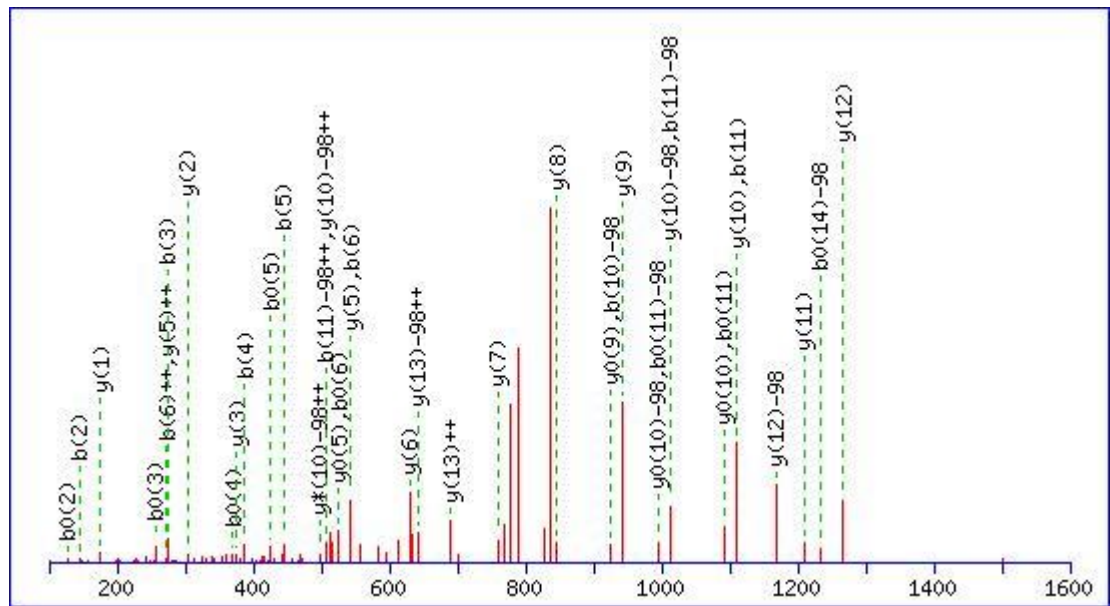

Monoisotopic mass of neutral peptide Mr(calc): 1651.7090

Variable modifications:

S7 : Phospho (ST), with neutral losses 0.0000(shown in table), 97.9769

Ions Score: 86 Expect: 6.6e-006

Matches : 40/218 fragment ions using 42 most intense peaks ([help](#))

| #  | b         | b <sup>++</sup> | b <sup>0</sup> | b <sup>0++</sup> | Seq. | y         | y <sup>++</sup> | y <sup>*</sup> | y <sup>+++</sup> | y <sup>0</sup> | y <sup>0++</sup> | #  |
|----|-----------|-----------------|----------------|------------------|------|-----------|-----------------|----------------|------------------|----------------|------------------|----|
| 1  | 58.0287   | 29.5180         |                |                  | G    |           |                 |                |                  |                |                  | 16 |
| 2  | 145.0608  | 73.0340         | 127.0502       | 64.0287          | S    | 1595.6949 | 798.3511        | 1578.6683      | 789.8378         | 1577.6843      | 789.3458         | 15 |
| 3  | 274.1034  | 137.5553        | 256.0928       | 128.5500         | E    | 1508.6628 | 754.8351        | 1491.6363      | 746.3218         | 1490.6523      | 745.8298         | 14 |
| 4  | 387.1874  | 194.0974        | 369.1769       | 185.0921         | L    | 1379.6203 | 690.3138        | 1362.5937      | 681.8005         | 1361.6097      | 681.3085         | 13 |
| 5  | 444.2089  | 222.6081        | 426.1983       | 213.6028         | G    | 1266.5362 | 633.7717        | 1249.5096      | 625.2585         | 1248.5256      | 624.7664         | 12 |
| 6  | 543.2773  | 272.1423        | 525.2667       | 263.1370         | V    | 1209.5147 | 605.2610        | 1192.4882      | 596.7477         | 1191.5042      | 596.2557         | 11 |
| 7  | 710.2757  | 355.6415        | 692.2651       | 346.6362         | S    | 1110.4463 | 555.7268        | 1093.4198      | 547.2135         | 1092.4357      | 546.7215         | 10 |
| 8  | 807.3284  | 404.1679        | 789.3179       | 395.1626         | P    | 943.4480  | 472.2276        | 926.4214       | 463.7143         | 925.4374       | 463.2223         | 9  |
| 9  | 894.3605  | 447.6839        | 876.3499       | 438.6786         | S    | 846.3952  | 423.7012        | 829.3686       | 415.1880         | 828.3846       | 414.6959         | 8  |
| 10 | 1023.4030 | 512.2052        | 1005.3925      | 503.1999         | E    | 759.3632  | 380.1852        | 742.3366       | 371.6719         | 741.3526       | 371.1799         | 7  |
| 11 | 1110.4351 | 555.7212        | 1092.4245      | 546.7159         | S    | 630.3206  | 315.6639        | 613.2940       | 307.1506         | 612.3100       | 306.6586         | 6  |
| 12 | 1207.4878 | 604.2476        | 1189.4773      | 595.2423         | P    | 543.2885  | 272.1479        | 526.2620       | 263.6346         | 525.2780       | 263.1426         | 5  |
| 13 | 1278.5250 | 639.7661        | 1260.5144      | 630.7608         | A    | 446.2358  | 223.6215        | 429.2092       | 215.1083         | 428.2252       | 214.6162         | 4  |
| 14 | 1349.5621 | 675.2847        | 1331.5515      | 666.2794         | A    | 375.1987  | 188.1030        | 358.1721       | 179.5897         | 357.1881       | 179.0977         | 3  |
| 15 | 1478.6047 | 739.8060        | 1460.5941      | 730.8007         | E    | 304.1615  | 152.5844        | 287.1350       | 144.0711         | 286.1510       | 143.5791         | 2  |
| 16 |           |                 |                |                  | R    | 175.1190  | 88.0631         | 158.0924       | 79.5498          |                |                  | 1  |

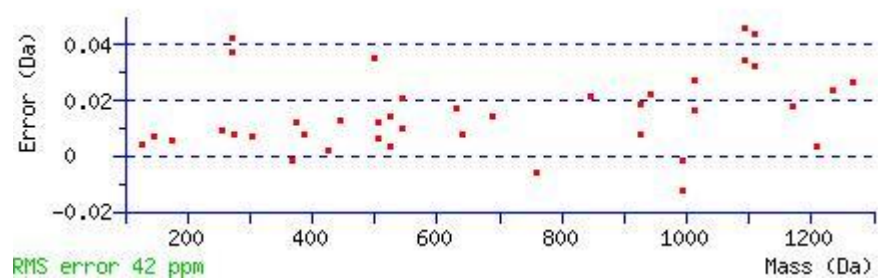

5\_MS/MS Fragmentation of **GSELGVSPSESPAER**

Found in **O95180**, Voltage-dependent T-type calcium channel subunit alpha-1H OS=Homo sapiens GN=CACNA1H PE=1 SV=4

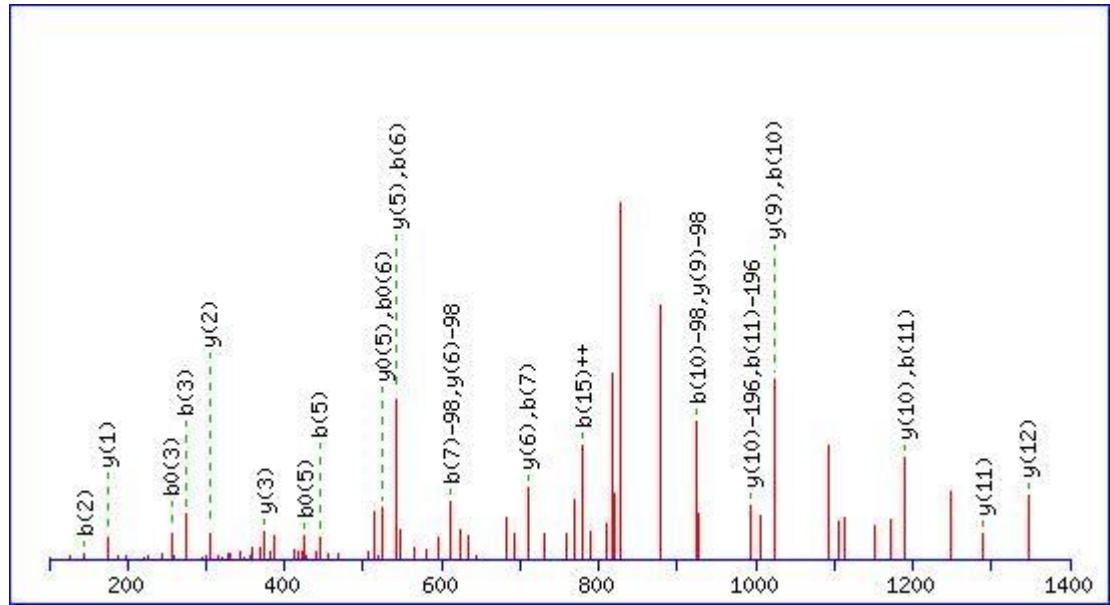

Monoisotopic mass of neutral peptide Mr(calc): 1731.6754

Variable modifications:

S7 : Phospho (ST), with neutral losses 0.0000(shown in table), 97.9769

S11 : Phospho (ST), with neutral losses 0.0000(shown in table), 97.9769

Ions Score: 75 Expect: 6.2e-005

Matches : 27/242 fragment ions using 25 most intense peaks ([help](#))

| #  | b         | b <sup>++</sup> | b <sup>0</sup> | b <sup>0++</sup> | Seq. | y         | y <sup>++</sup> | y <sup>*</sup> | y <sup>*++</sup> | y <sup>0</sup> | y <sup>0++</sup> | #  |
|----|-----------|-----------------|----------------|------------------|------|-----------|-----------------|----------------|------------------|----------------|------------------|----|
| 1  | 58.0287   | 29.5180         |                |                  | G    |           |                 |                |                  |                |                  | 16 |
| 2  | 145.0608  | 73.0340         | 127.0502       | 64.0287          | S    | 1675.6612 | 838.3342        | 1658.6347      | 829.8210         | 1657.6506      | 829.3290         | 15 |
| 3  | 274.1034  | 137.5553        | 256.0928       | 128.5500         | E    | 1588.6292 | 794.8182        | 1571.6026      | 786.3050         | 1570.6186      | 785.8129         | 14 |
| 4  | 387.1874  | 194.0974        | 369.1769       | 185.0921         | L    | 1459.5866 | 730.2969        | 1442.5600      | 721.7837         | 1441.5760      | 721.2916         | 13 |
| 5  | 444.2089  | 222.6081        | 426.1983       | 213.6028         | G    | 1346.5025 | 673.7549        | 1329.4760      | 665.2416         | 1328.4920      | 664.7496         | 12 |
| 6  | 543.2773  | 272.1423        | 525.2667       | 263.1370         | V    | 1289.4811 | 645.2442        | 1272.4545      | 636.7309         | 1271.4705      | 636.2389         | 11 |
| 7  | 710.2757  | 355.6415        | 692.2651       | 346.6362         | S    | 1190.4126 | 595.7100        | 1173.3861      | 587.1967         | 1172.4021      | 586.7047         | 10 |
| 8  | 807.3284  | 404.1679        | 789.3179       | 395.1626         | P    | 1023.4143 | 512.2108        | 1006.3877      | 503.6975         | 1005.4037      | 503.2055         | 9  |
| 9  | 894.3605  | 447.6839        | 876.3499       | 438.6786         | S    | 926.3615  | 463.6844        | 909.3350       | 455.1711         | 908.3510       | 454.6791         | 8  |
| 10 | 1023.4030 | 512.2052        | 1005.3925      | 503.1999         | E    | 839.3295  | 420.1684        | 822.3029       | 411.6551         | 821.3189       | 411.1631         | 7  |
| 11 | 1190.4014 | 595.7043        | 1172.3908      | 586.6991         | S    | 710.2869  | 355.6471        | 693.2603       | 347.1338         | 692.2763       | 346.6418         | 6  |
| 12 | 1287.4542 | 644.2307        | 1269.4436      | 635.2254         | P    | 543.2885  | 272.1479        | 526.2620       | 263.6346         | 525.2780       | 263.1426         | 5  |
| 13 | 1358.4913 | 679.7493        | 1340.4807      | 670.7440         | A    | 446.2358  | 223.6215        | 429.2092       | 215.1083         | 428.2252       | 214.6162         | 4  |
| 14 | 1429.5284 | 715.2678        | 1411.5178      | 706.2626         | A    | 375.1987  | 188.1030        | 358.1721       | 179.5897         | 357.1881       | 179.0977         | 3  |
| 15 | 1558.5710 | 779.7891        | 1540.5604      | 770.7839         | E    | 304.1615  | 152.5844        | 287.1350       | 144.0711         | 286.1510       | 143.5791         | 2  |
| 16 |           |                 |                |                  | R    | 175.1190  | 88.0631         | 158.0924       | 79.5498          |                |                  | 1  |

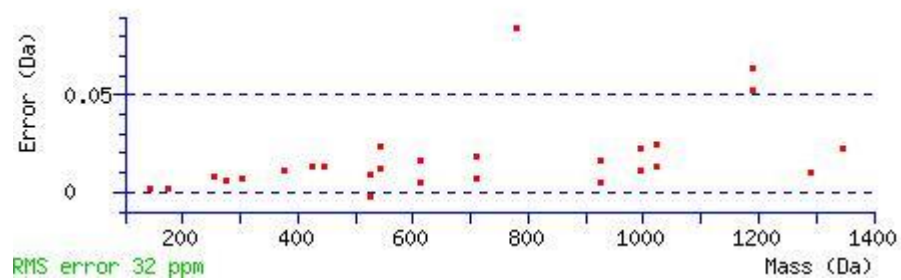

6\_MS/MS Fragmentation of **EAERGSELGVSPSESPAER**

Found in **O95180**, Voltage-dependent T-type calcium channel subunit alpha-1H OS=Homo sapiens GN=CACNA1H PE=1 SV=4

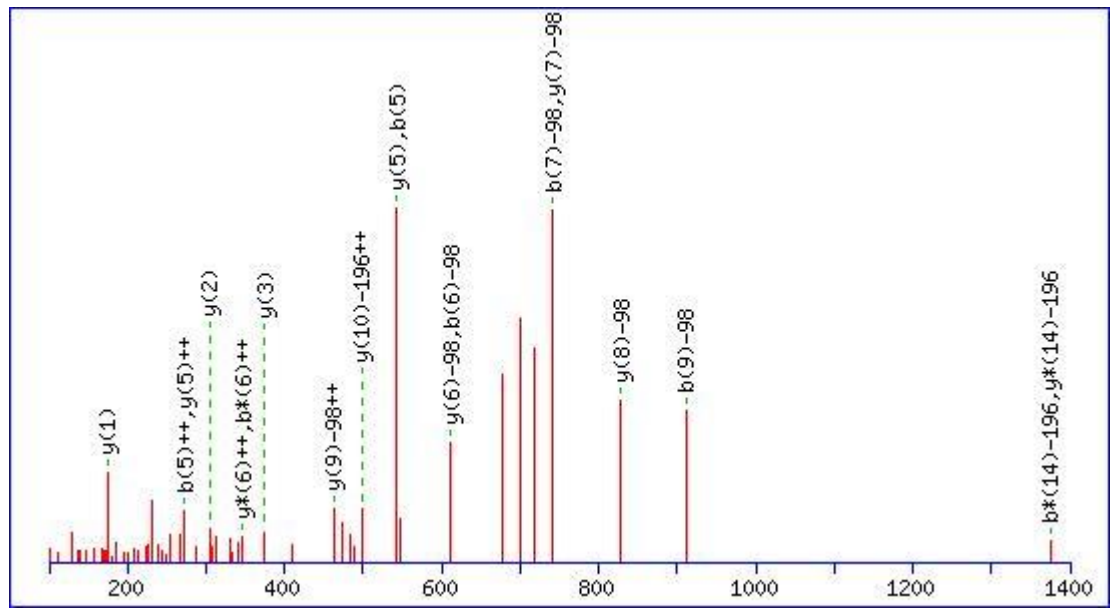

Monoisotopic mass of neutral peptide Mr(calc): 2296.8651

Variable modifications:

S6 : Phospho (ST), with neutral losses 97.9769(shown in table), 0.0000

S11 : Phospho (ST), with neutral losses 97.9769(shown in table), 0.0000

S15 : Phospho (ST), with neutral losses 97.9769(shown in table), 0.0000

Ions Score: 36 Expect: 0.41

Matches : 19/388 fragment ions using 22 most intense peaks ([help](#))

| # | b        | b <sup>++</sup> | b <sup>*</sup> | b <sup>*++</sup> | b <sup>0</sup> | b <sup>0++</sup> | Seq | y         | y <sup>++</sup> | y <sup>*</sup> | y <sup>*++</sup> | y <sup>0</sup> | y <sup>0++</sup> | #  |
|---|----------|-----------------|----------------|------------------|----------------|------------------|-----|-----------|-----------------|----------------|------------------|----------------|------------------|----|
| 1 | 130.0499 | 65.5286         |                |                  | 112.0393       | 56.5233          | E   |           |                 |                |                  |                |                  | 20 |
| 2 | 201.0870 | 101.0471        |                |                  | 183.0764       | 92.0418          | A   | 1874.8991 | 937.9532        | 1857.8726      | 929.4399         | 1856.8886      | 928.9479         | 19 |
| 3 | 330.1296 | 165.5684        |                |                  | 312.1190       | 156.5631         | E   | 1803.8620 | 902.4346        | 1786.8355      | 893.9214         | 1785.8514      | 893.4294         | 18 |
| 4 | 486.2307 | 243.6190        | 469.2041       | 235.1057         | 468.2201       | 234.6137         | R   | 1674.8194 | 837.9133        | 1657.7929      | 829.4001         | 1656.8089      | 828.9081         | 17 |
| 5 | 543.2522 | 272.1297        | 526.2256       | 263.6164         | 525.2416       | 263.1244         | G   | 1518.7183 | 759.8628        | 1501.6918      | 751.3495         | 1500.7077      | 750.8575         | 16 |
| 6 | 612.2736 | 306.6404        | 595.2471       | 298.1272         | 594.2630       | 297.6352         | S   | 1461.6968 | 731.3521        | 1444.6703      | 722.8388         | 1443.6863      | 722.3468         | 15 |
| 7 | 741.3162 | 371.1617        | 724.2897       | 362.6485         | 723.3056       | 362.1565         | E   | 1392.6754 | 696.8413        | 1375.6488      | 688.3281         | 1374.6648      | 687.8360         | 14 |
| 8 | 854.4003 | 427.7038        | 837.3737       | 419.1905         | 836.3897       | 418.6985         | L   | 1263.6328 | 632.3200        | 1246.6062      | 623.8068         | 1245.6222      | 623.3148         | 13 |
| 9 | 911.4217 | 456.214         | 894.3952       | 447.701          | 893.4112       | 447.209          | G   | 1150.548  | 575.778         | 1133.522       | 567.264          | 1132.538       | 566.772          | 1  |

|    |               |              |               |              |               |              |   |               |              |               |              |               |              |    |
|----|---------------|--------------|---------------|--------------|---------------|--------------|---|---------------|--------------|---------------|--------------|---------------|--------------|----|
|    |               | 5            |               | 2            |               | 2            |   | 7             | 0            | 2             | 7            | 2             | 7            | 2  |
| 10 | 1010.490<br>1 | 505.748<br>7 | 993.4636      | 497.235<br>4 | 992.4796      | 496.743<br>4 | V | 1093.527<br>3 | 547.267<br>3 | 1076.500<br>7 | 538.754<br>0 | 1075.516<br>7 | 538.262<br>0 | 12 |
| 11 | 1079.511<br>6 | 540.259<br>4 | 1062.485<br>1 | 531.746<br>2 | 1061.501<br>0 | 531.254<br>2 | S | 994.4588      | 497.733<br>1 | 977.4323      | 489.219<br>8 | 976.4483      | 488.727<br>8 | 10 |
| 12 | 1176.564<br>4 | 588.785<br>8 | 1159.537<br>8 | 580.272<br>6 | 1158.553<br>8 | 579.780<br>5 | P | 925.4374      | 463.222<br>3 | 908.4108      | 454.709<br>1 | 907.4268      | 454.217<br>0 | 9  |
| 13 | 1263.596<br>4 | 632.301<br>8 | 1246.569<br>9 | 623.788<br>6 | 1245.585<br>8 | 623.296<br>6 | S | 828.3846      | 414.695<br>9 | 811.3581      | 406.182<br>7 | 810.3741      | 405.690<br>7 | 8  |
| 14 | 1392.639<br>0 | 696.823<br>1 | 1375.612<br>4 | 688.309<br>9 | 1374.628<br>4 | 687.817<br>9 | E | 741.3526      | 371.179<br>9 | 724.3260      | 362.666<br>7 | 723.3420      | 362.174<br>7 | 7  |
| 15 | 1461.660<br>5 | 731.333<br>9 | 1444.633<br>9 | 722.820<br>6 | 1443.649<br>9 | 722.328<br>6 | S | 612.3100      | 306.658<br>6 | 595.2835      | 298.145<br>4 | 594.2994      | 297.653<br>4 | 6  |
| 16 | 1558.713<br>2 | 779.860<br>3 | 1541.686<br>7 | 771.347<br>0 | 1540.702<br>7 | 770.855<br>0 | P | 543.2885      | 272.147<br>9 | 526.2620      | 263.634<br>6 | 525.2780      | 263.142<br>6 | 5  |
| 17 | 1629.750<br>3 | 815.378<br>8 | 1612.723<br>8 | 806.865<br>5 | 1611.739<br>8 | 806.373<br>5 | A | 446.2358      | 223.621<br>5 | 429.2092      | 215.108<br>3 | 428.2252      | 214.616<br>2 | 4  |
| 18 | 1700.787<br>5 | 850.897<br>4 | 1683.760<br>9 | 842.384<br>1 | 1682.776<br>9 | 841.892<br>1 | A | 375.1987      | 188.103<br>0 | 358.1721      | 179.589<br>7 | 357.1881      | 179.097<br>7 | 3  |
| 19 | 1829.830<br>0 | 915.418<br>7 | 1812.803<br>5 | 906.905<br>4 | 1811.819<br>5 | 906.413<br>4 | E | 304.1615      | 152.584<br>4 | 287.1350      | 144.071<br>1 | 286.1510      | 143.579<br>1 | 2  |
| 20 |               |              |               |              |               |              | R | 175.1190      | 88.0631      | 158.0924      | 79.5498      |               |              | 1  |

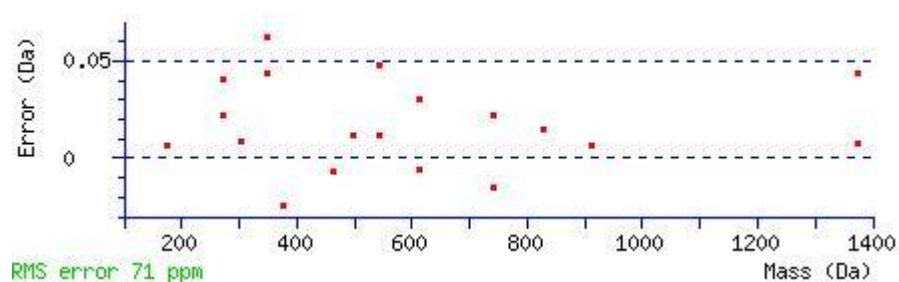

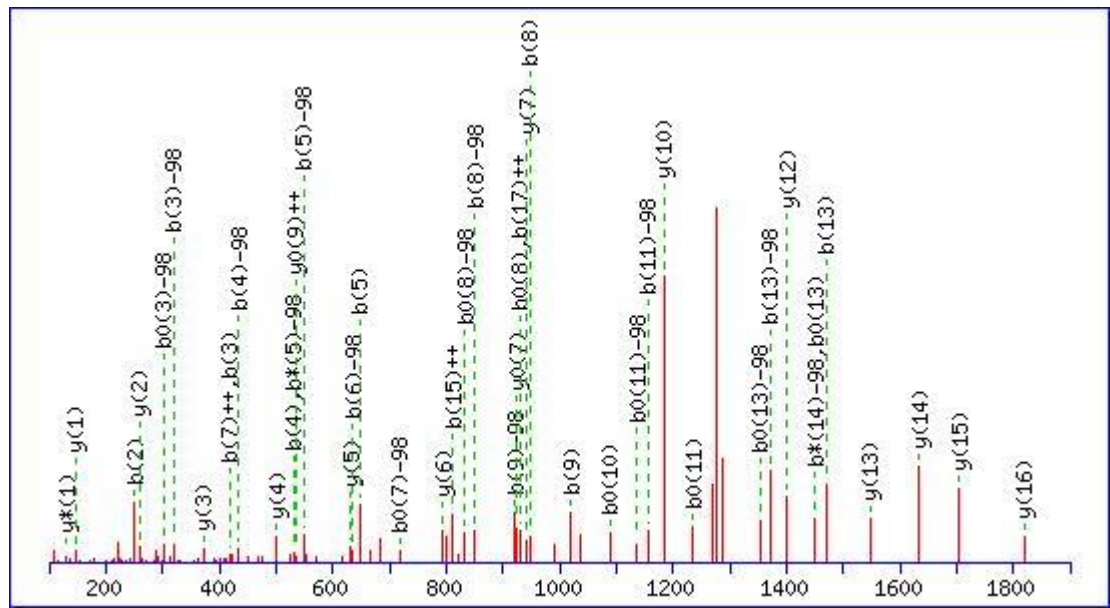

Monoisotopic mass of neutral peptide Mr(calc): 2652.1124

Variable modifications:

S3 : Phospho (ST), with neutral losses 97.9769(shown in table), 0.0000

C17 : Methylthio (C)

Ions Score: 84 Expect: 1.2e-005

Matches : 45/378 fragment ions using 61 most intense peaks ([help](#))

| # | b            | b <sup>++</sup> | b <sup>*</sup> | b <sup>+++</sup> | b <sup>0</sup> | b <sup>0++</sup> | Seq | y             | y <sup>++</sup> | y <sup>*</sup> | y <sup>+++</sup> | y <sup>0</sup> | y <sup>0++</sup> | #      |
|---|--------------|-----------------|----------------|------------------|----------------|------------------|-----|---------------|-----------------|----------------|------------------|----------------|------------------|--------|
| 1 | 138.066<br>2 | 69.5367         |                |                  |                |                  | H   |               |                 |                |                  |                |                  | 2<br>3 |
| 2 | 251.150<br>3 | 126.078<br>8    |                |                  |                |                  | L   | 2418.08<br>40 | 1209.54<br>56   | 2401.05<br>74  | 1201.03<br>23    | 2400.07<br>34  | 1200.54<br>03    | 2<br>2 |
| 3 | 320.171<br>7 | 160.589<br>5    |                |                  | 302.161<br>1   | 151.584<br>2     | S   | 2304.99<br>99 | 1153.00<br>36   | 2287.97<br>33  | 1144.49<br>03    | 2286.98<br>93  | 1143.99<br>83    | 2<br>1 |
| 4 | 434.214<br>6 | 217.611<br>0    | 417.188<br>1   | 209.097<br>7     | 416.204<br>1   | 208.605<br>7     | N   | 2235.97<br>84 | 1118.492<br>9   | 2218.95<br>19  | 1109.97<br>96    | 2217.96<br>79  | 1109.48<br>76    | 2<br>0 |
| 5 | 549.241<br>6 | 275.124<br>4    | 532.215<br>0   | 266.611<br>2     | 531.231<br>0   | 266.119<br>1     | D   | 2121.93<br>55 | 1061.47<br>14   | 2104.90<br>90  | 1052.95<br>81    | 2103.92<br>49  | 1052.46<br>61    | 1<br>9 |
| 6 | 636.273<br>6 | 318.640<br>4    | 619.247<br>1   | 310.127<br>2     | 618.263<br>0   | 309.635<br>2     | S   | 2006.90<br>86 | 1003.95<br>79   | 1989.88<br>20  | 995.444<br>6     | 1988.89<br>80  | 994.952<br>6     | 1<br>8 |
| 7 | 737.321<br>3 | 369.164<br>3    | 720.294<br>7   | 360.651<br>0     | 719.310<br>7   | 360.159<br>0     | T   | 1919.87<br>65 | 960.441<br>9    | 1902.85<br>00  | 951.928<br>6     | 1901.86<br>60  | 951.436<br>6     | 1<br>7 |
| 8 | 850.405<br>4 | 425.706<br>3    | 833.378<br>8   | 417.193<br>0     | 832.394<br>8   | 416.701<br>0     | L   | 1818.82<br>89 | 909.918<br>1    | 1801.80<br>23  | 901.404<br>8     | 1800.81<br>83  | 900.912<br>8     | 1<br>6 |
| 9 | 921.442<br>5 | 461.224<br>9    | 904.415<br>9   | 452.711<br>6     | 903.431<br>9   | 452.219<br>6     | A   | 1705.74<br>48 | 853.376<br>0    | 1688.71<br>82  | 844.862<br>8     | 1687.73<br>42  | 844.370<br>7     | 1<br>5 |

|           |                             |               |                             |               |                             |               |          |                             |              |                            |              |                            |                            |           |
|-----------|-----------------------------|---------------|-----------------------------|---------------|-----------------------------|---------------|----------|-----------------------------|--------------|----------------------------|--------------|----------------------------|----------------------------|-----------|
| <b>10</b> | 1008.47<br>45               | 504.740<br>9  | 991.447<br>9                | 496.227<br>6  | 990.463<br>9                | 495.735<br>6  | <b>S</b> | <b>1634.70</b><br><b>77</b> | 817.857<br>5 | 1617.68<br>11              | 809.344<br>2 | 1616.69<br>71              | 808.852<br>2               | <b>14</b> |
| <b>11</b> | <b>1155.54</b><br><b>29</b> | 578.275<br>1  | 1138.51<br>64               | 569.761<br>8  | <b>1137.53</b><br><b>23</b> | 569.269<br>8  | <b>F</b> | <b>1547.67</b><br><b>56</b> | 774.341<br>5 | 1530.64<br>91              | 765.828<br>2 | 1529.66<br>51              | 765.336<br>2               | <b>13</b> |
| <b>12</b> | 1242.57<br>49               | 621.791<br>1  | 1225.54<br>84               | 613.277<br>8  | 1224.56<br>44               | 612.785<br>8  | <b>S</b> | <b>1400.60</b><br><b>72</b> | 700.807<br>3 | 1383.58<br>07              | 692.294<br>0 | 1382.59<br>67              | 691.802<br>0               | <b>12</b> |
| <b>13</b> | <b>1371.61</b><br><b>75</b> | 686.312<br>4  | 1354.59<br>10               | 677.799<br>1  | <b>1353.60</b><br><b>70</b> | 677.307<br>1  | <b>E</b> | 1313.57<br>52               | 657.291<br>2 | 1296.54<br>87              | 648.778<br>0 | 1295.56<br>46              | 648.286<br>0               | <b>11</b> |
| <b>14</b> | 1468.67<br>03               | 734.838<br>8  | <b>1451.64</b><br><b>37</b> | 726.325<br>5  | 1450.65<br>97               | 725.833<br>5  | <b>P</b> | <b>1184.53</b><br><b>26</b> | 592.769<br>9 | 1167.50<br>61              | 584.256<br>7 | 1166.52<br>20              | 583.764<br>7               | <b>10</b> |
| <b>15</b> | 1525.69<br>18               | 763.349<br>5  | 1508.66<br>52               | 754.836<br>2  | 1507.68<br>12               | 754.344<br>2  | <b>G</b> | 1087.47<br>98               | 544.243<br>6 | 1070.45<br>33              | 535.730<br>3 | 1069.46<br>93              | <b>535.238</b><br><b>3</b> | <b>9</b>  |
| <b>16</b> | 1612.72<br>38               | 806.865<br>5  | 1595.69<br>72               | 798.352<br>3  | 1594.71<br>32               | 797.860<br>3  | <b>S</b> | 1030.45<br>84               | 515.732<br>8 | 1013.43<br>18              | 507.219<br>6 | 1012.44<br>78              | 506.727<br>5               | <b>8</b>  |
| <b>17</b> | 1761.72<br>07               | 881.364<br>0  | 1744.69<br>41               | 872.850<br>7  | 1743.71<br>01               | 872.358<br>7  | <b>C</b> | <b>943.426</b><br><b>4</b>  | 472.216<br>8 | 926.399<br>8               | 463.703<br>5 | <b>925.415</b><br><b>8</b> | 463.211<br>5               | <b>7</b>  |
| <b>18</b> | 1924.78<br>40               | 962.895<br>7  | 1907.75<br>75               | 954.382<br>4  | 1906.77<br>35               | 953.890<br>4  | <b>Y</b> | <b>794.429</b><br><b>4</b>  | 397.718<br>4 | 777.402<br>9               | 389.205<br>1 | 776.418<br>9               | 388.713<br>1               | <b>6</b>  |
| <b>19</b> | 2053.82<br>66               | 1027.41<br>69 | 2036.80<br>01               | 1018.90<br>37 | 2035.81<br>61               | 1018.41<br>17 | <b>E</b> | <b>631.366</b><br><b>1</b>  | 316.186<br>7 | 614.339<br>6               | 307.673<br>4 | 613.355<br>6               | 307.181<br>4               | <b>5</b>  |
| <b>20</b> | 2182.86<br>92               | 1091.93<br>82 | 2165.84<br>27               | 1083.42<br>50 | 2164.85<br>86               | 1082.93<br>30 | <b>E</b> | <b>502.323</b><br><b>5</b>  | 251.665<br>4 | 485.297<br>0               | 243.152<br>1 | 484.313<br>0               | 242.660<br>1               | <b>4</b>  |
| <b>21</b> | 2295.95<br>33               | 1148.48<br>03 | 2278.92<br>67               | 1139.96<br>70 | 2277.94<br>27               | 1139.47<br>50 | <b>L</b> | <b>373.280</b><br><b>9</b>  | 187.144<br>1 | 356.254<br>4               | 178.630<br>8 |                            |                            | <b>3</b>  |
| <b>22</b> | 2409.03<br>73               | 1205.02<br>23 | 2392.01<br>08               | 1196.50<br>90 | 2391.02<br>68               | 1196.01<br>70 | <b>L</b> | <b>260.196</b><br><b>9</b>  | 130.602<br>1 | 243.170<br>3               | 122.088<br>8 |                            |                            | <b>2</b>  |
| <b>23</b> |                             |               |                             |               |                             |               | <b>K</b> | <b>147.112</b><br><b>8</b>  | 74.0600      | <b>130.086</b><br><b>3</b> | 65.5468      |                            |                            | <b>1</b>  |

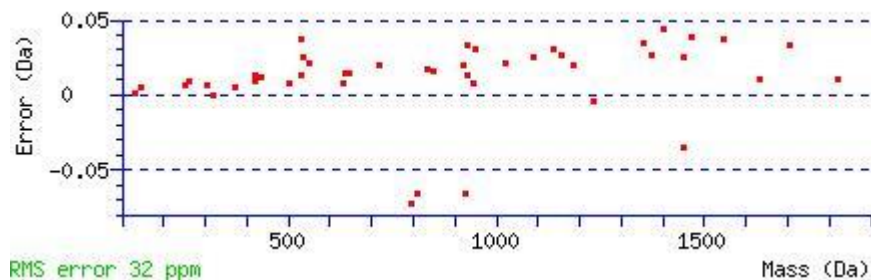

8\_MS/MS Fragmentation of **AGAPPPSPGR**

Found in **O95180**, Voltage-dependent T-type calcium channel subunit alpha-1H OS=Homo sapiens GN=CACNA1H PE=1 SV=4

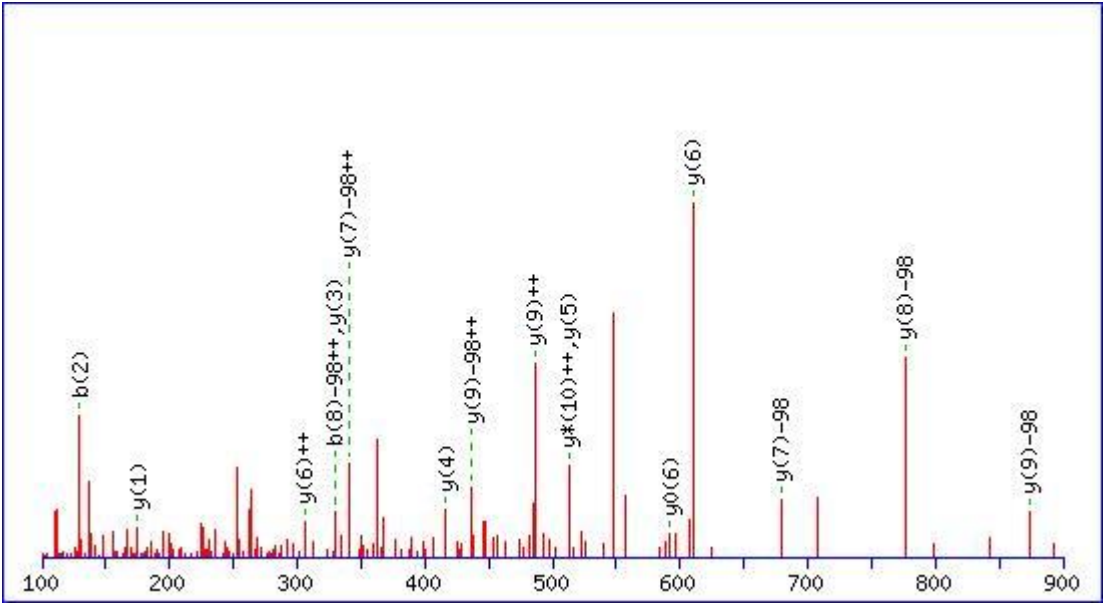

Monoisotopic mass of neutral peptide Mr(calc): 1169.5230

Variable modifications:

S6 : Phospho (ST), with neutral losses 97.9769(shown in table), 0.0000

Ions Score: 37 Expect: 0.35

Matches : 16/148 fragment ions using 35 most intense peaks ([help](#))

| #  | b        | b <sup>++</sup> | b <sup>0</sup> | b <sup>0++</sup> | Seq. | y         | y <sup>++</sup> | y <sup>*</sup> | y <sup>*++</sup> | y <sup>0</sup> | y <sup>0++</sup> | #  |
|----|----------|-----------------|----------------|------------------|------|-----------|-----------------|----------------|------------------|----------------|------------------|----|
| 1  | 72.0444  | 36.5258         |                |                  | A    |           |                 |                |                  |                |                  | 12 |
| 2  | 129.0659 | 65.0366         |                |                  | G    | 1001.5163 | 501.2618        | 984.4898       | 492.7485         | 983.5057       | 492.2565         | 11 |
| 3  | 200.1030 | 100.5551        |                |                  | A    | 944.4948  | 472.7511        | 927.4683       | 464.2378         | 926.4843       | 463.7458         | 10 |
| 4  | 297.1557 | 149.0815        |                |                  | P    | 873.4577  | 437.2325        | 856.4312       | 428.7192         | 855.4472       | 428.2272         | 9  |
| 5  | 394.2085 | 197.6079        |                |                  | P    | 776.4050  | 388.7061        | 759.3784       | 380.1928         | 758.3944       | 379.7008         | 8  |
| 6  | 463.2300 | 232.1186        | 445.2194       | 223.1133         | S    | 679.3522  | 340.1797        | 662.3257       | 331.6665         | 661.3416       | 331.1745         | 7  |
| 7  | 560.2827 | 280.6450        | 542.2722       | 271.6397         | P    | 610.3307  | 305.6690        | 593.3042       | 297.1557         | 592.3202       | 296.6637         | 6  |
| 8  | 657.3355 | 329.1714        | 639.3249       | 320.1661         | P    | 513.2780  | 257.1426        | 496.2514       | 248.6293         | 495.2674       | 248.1373         | 5  |
| 9  | 744.3675 | 372.6874        | 726.3569       | 363.6821         | S    | 416.2252  | 208.6162        | 399.1987       | 200.1030         | 398.2146       | 199.6110         | 4  |
| 10 | 841.4203 | 421.2138        | 823.4097       | 412.2085         | P    | 329.1932  | 165.1002        | 312.1666       | 156.5870         |                |                  | 3  |
| 11 | 898.4417 | 449.7245        | 880.4312       | 440.7192         | G    | 232.1404  | 116.5738        | 215.1139       | 108.0606         |                |                  | 2  |
| 12 |          |                 |                |                  | R    | 175.1190  | 88.0631         | 158.0924       | 79.5498          |                |                  | 1  |

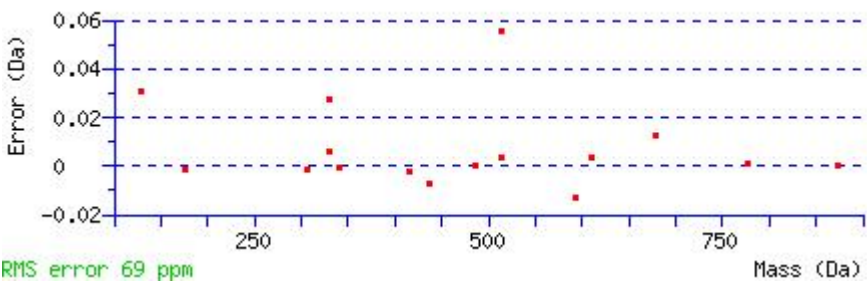

9\_MS/MS Fragmentation of **AGAPPSPSPGR**

Found in **O95180**, Voltage-dependent T-type calcium channel subunit alpha-1H OS=Homo sapiens GN=CACNA1H PE=1 SV=4

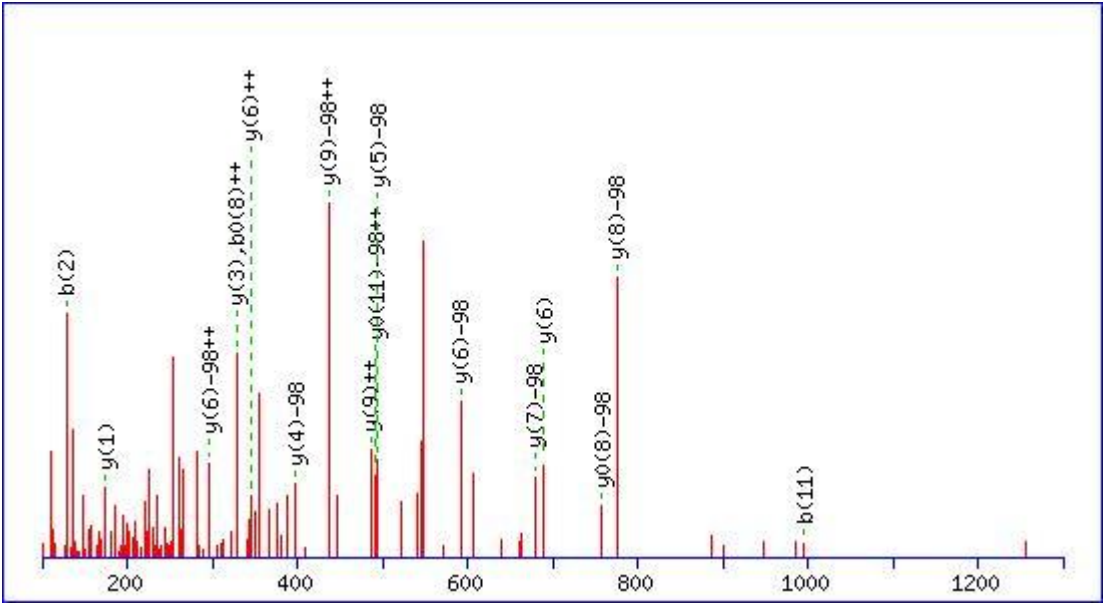

Monoisotopic mass of neutral peptide Mr(calc): 1169.5230

Variable modifications:

S9 : Phospho (ST), with neutral losses 97.9769(shown in table), 0.0000

Ions Score: 31 Expect: 1.7

Matches : 17/154 fragment ions using 31 most intense peaks ([help](#))

| #  | b        | b <sup>++</sup> | b <sup>0</sup> | b <sup>0++</sup> | Seq. | y         | y <sup>++</sup> | y <sup>*</sup> | y <sup>*++</sup> | y <sup>0</sup> | y <sup>0++</sup> | #  |
|----|----------|-----------------|----------------|------------------|------|-----------|-----------------|----------------|------------------|----------------|------------------|----|
| 1  | 72.0444  | 36.5258         |                |                  | A    |           |                 |                |                  |                |                  | 12 |
| 2  | 129.0659 | 65.0366         |                |                  | G    | 1001.5163 | 501.2618        | 984.4898       | 492.7485         | 983.5057       | 492.2565         | 11 |
| 3  | 200.1030 | 100.5551        |                |                  | A    | 944.4948  | 472.7511        | 927.4683       | 464.2378         | 926.4843       | 463.7458         | 10 |
| 4  | 297.1557 | 149.0815        |                |                  | P    | 873.4577  | 437.2325        | 856.4312       | 428.7192         | 855.4472       | 428.2272         | 9  |
| 5  | 394.2085 | 197.6079        |                |                  | P    | 776.4050  | 388.7061        | 759.3784       | 380.1928         | 758.3944       | 379.7008         | 8  |
| 6  | 481.2405 | 241.1239        | 463.2300       | 232.1186         | S    | 679.3522  | 340.1797        | 662.3257       | 331.6665         | 661.3416       | 331.1745         | 7  |
| 7  | 578.2933 | 289.6503        | 560.2827       | 280.6450         | P    | 592.3202  | 296.6637        | 575.2936       | 288.1504         | 574.3096       | 287.6584         | 6  |
| 8  | 675.3461 | 338.1767        | 657.3355       | 329.1714         | P    | 495.2674  | 248.1373        | 478.2409       | 239.6241         | 477.2568       | 239.1321         | 5  |
| 9  | 744.3675 | 372.6874        | 726.3569       | 363.6821         | S    | 398.2146  | 199.6110        | 381.1881       | 191.0977         | 380.2041       | 190.6057         | 4  |
| 10 | 841.4203 | 421.2138        | 823.4097       | 412.2085         | P    | 329.1932  | 165.1002        | 312.1666       | 156.5870         |                |                  | 3  |
| 11 | 898.4417 | 449.7245        | 880.4312       | 440.7192         | G    | 232.1404  | 116.5738        | 215.1139       | 108.0606         |                |                  | 2  |
| 12 |          |                 |                |                  | R    | 175.1190  | 88.0631         | 158.0924       | 79.5498          |                |                  | 1  |

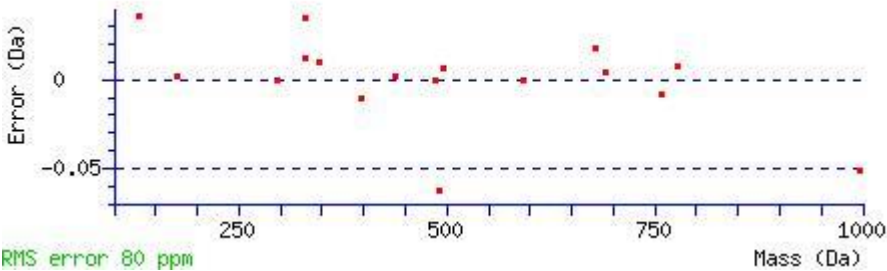

10\_MS/MS Fragmentation of **AGAPPSPSPGR**Found in **O95180**, Voltage-dependent T-type calcium channel subunit alpha-1H OS=Homo sapiens GN=CACNA1H PE=1 SV=4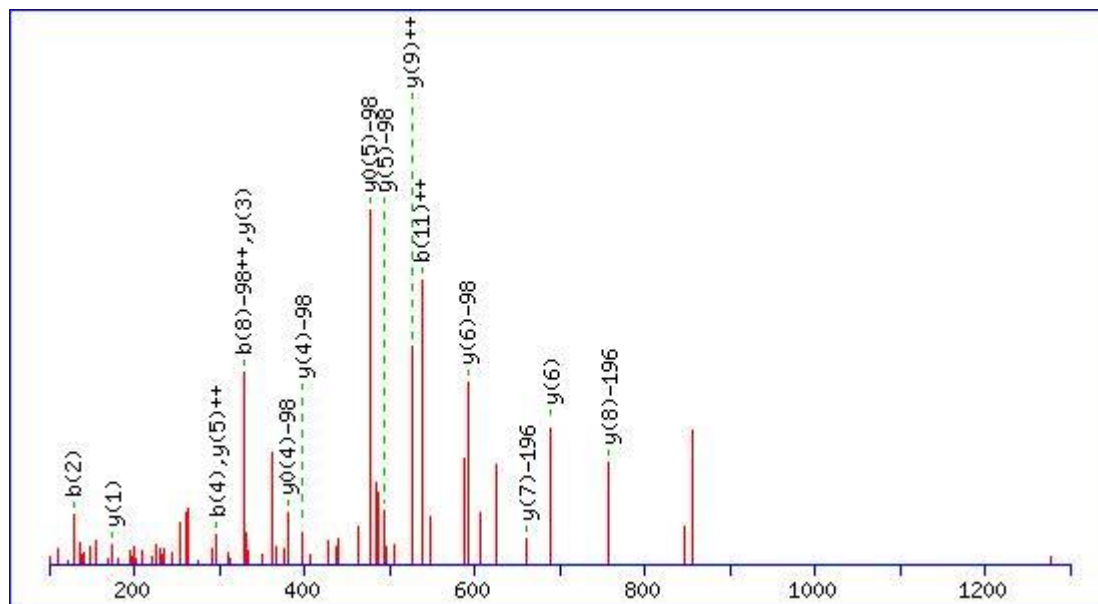

Monoisotopic mass of neutral peptide Mr(calc): 1249.4893

Variable modifications:

S6 : Phospho (ST), with neutral losses 97.9769(shown in table), 0.0000

S9 : Phospho (ST), with neutral losses 97.9769(shown in table), 0.0000

Ions Score: 35 Expect: 0.52

Matches : 16/166 fragment ions using 27 most intense peaks ([help](#))

| #         | b               | b <sup>++</sup> | b <sup>0</sup> | b <sup>0++</sup> | Seq.     | y               | y <sup>++</sup> | y <sup>*</sup> | y <sup>*++</sup> | y <sup>0</sup>  | y <sup>0++</sup> | #         |
|-----------|-----------------|-----------------|----------------|------------------|----------|-----------------|-----------------|----------------|------------------|-----------------|------------------|-----------|
| <b>1</b>  | 72.0444         | 36.5258         |                |                  | <b>A</b> |                 |                 |                |                  |                 |                  | <b>12</b> |
| <b>2</b>  | <b>129.0659</b> | 65.0366         |                |                  | <b>G</b> | 983.5057        | 492.2565        | 966.4792       | 483.7432         | 965.4952        | 483.2512         | <b>11</b> |
| <b>3</b>  | 200.1030        | 100.5551        |                |                  | <b>A</b> | 926.4843        | 463.7458        | 909.4577       | 455.2325         | 908.4737        | 454.7405         | <b>10</b> |
| <b>4</b>  | <b>297.1557</b> | 149.0815        |                |                  | <b>P</b> | 855.4472        | 428.2272        | 838.4206       | 419.7139         | 837.4366        | 419.2219         | <b>9</b>  |
| <b>5</b>  | 394.2085        | 197.6079        |                |                  | <b>P</b> | <b>758.3944</b> | 379.7008        | 741.3678       | 371.1876         | 740.3838        | 370.6956         | <b>8</b>  |
| <b>6</b>  | 463.2300        | 232.1186        | 445.2194       | 223.1133         | <b>S</b> | <b>661.3416</b> | 331.1745        | 644.3151       | 322.6612         | 643.3311        | 322.1692         | <b>7</b>  |
| <b>7</b>  | 560.2827        | 280.6450        | 542.2722       | 271.6397         | <b>P</b> | <b>592.3202</b> | 296.6637        | 575.2936       | 288.1504         | 574.3096        | 287.6584         | <b>6</b>  |
| <b>8</b>  | 657.3355        | <b>329.1714</b> | 639.3249       | 320.1661         | <b>P</b> | <b>495.2674</b> | 248.1373        | 478.2409       | 239.6241         | <b>477.2568</b> | 239.1321         | <b>5</b>  |
| <b>9</b>  | 726.3569        | 363.6821        | 708.3464       | 354.6768         | <b>S</b> | <b>398.2146</b> | 199.6110        | 381.1881       | 191.0977         | <b>380.2041</b> | 190.6057         | <b>4</b>  |
| <b>10</b> | 823.4097        | 412.2085        | 805.3991       | 403.2032         | <b>P</b> | <b>329.1932</b> | 165.1002        | 312.1666       | 156.5870         |                 |                  | <b>3</b>  |
| <b>11</b> | 880.4312        | 440.7192        | 862.4206       | 431.7139         | <b>G</b> | 232.1404        | 116.5738        | 215.1139       | 108.0606         |                 |                  | <b>2</b>  |
| <b>12</b> |                 |                 |                |                  | <b>R</b> | <b>175.1190</b> | 88.0631         | 158.0924       | 79.5498          |                 |                  | <b>1</b>  |

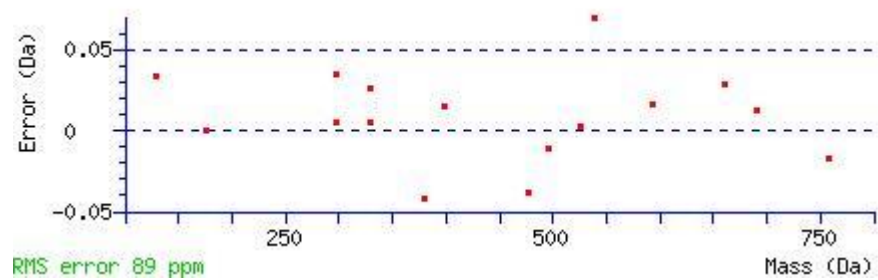

Found in **O95180**, Voltage-dependent T-type calcium channel subunit alpha-1H OS=Homo sapiens GN=CACNA1H PE=1 SV=4

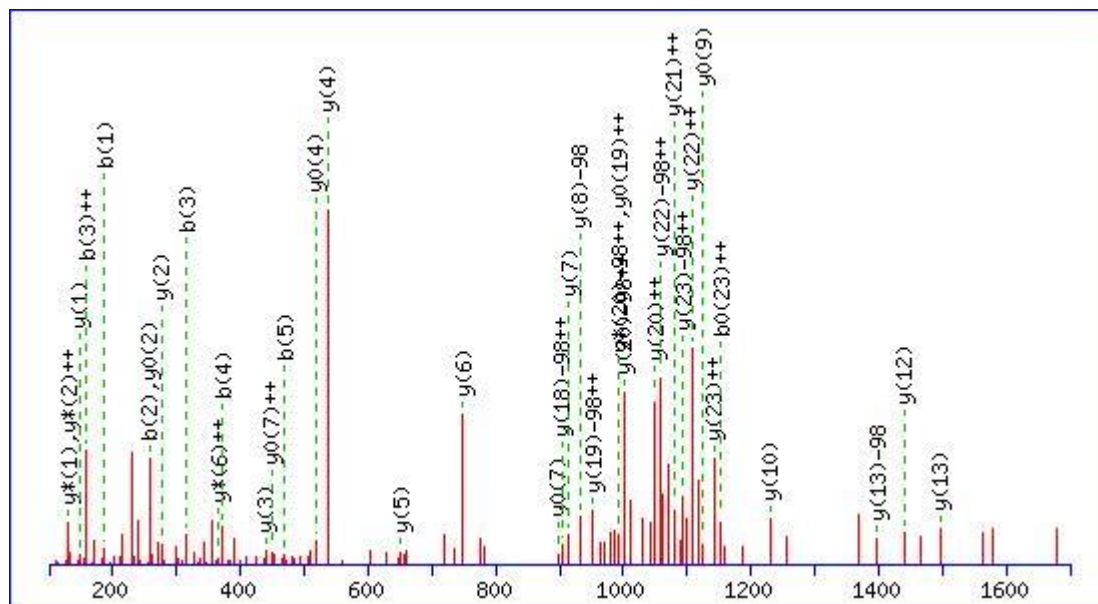

Variable modifications:

Ions Score: 40 Expect: 0.3

**Matches** : 38/366 fragment ions using 81 most intense peaks ([help](#))

| # | <b>b</b>     | <b>b<sup>++</sup></b> | <b>b<sup>*</sup></b> | <b>b<sup>*++</sup></b> | <b>b<sup>0</sup></b> | <b>b<sup>0++</sup></b> | Seq<br>. | <b>y</b>      | <b>y<sup>++</sup></b> | <b>y<sup>*</sup></b> | <b>y<sup>*++</sup></b> | <b>y<sup>0</sup></b> | <b>y<sup>0++</sup></b> | #  |
|---|--------------|-----------------------|----------------------|------------------------|----------------------|------------------------|----------|---------------|-----------------------|----------------------|------------------------|----------------------|------------------------|----|
| 1 | 187.086<br>6 | 94.0469               |                      |                        |                      |                        | W        |               |                       |                      |                        |                      |                        | 24 |
| 2 | 258.123<br>7 | 129.565<br>5          |                      |                        |                      |                        | A        | 2285.02<br>34 | 1143.01<br>53         | 2267.99<br>69        | 1134.50<br>21          | 2267.01<br>29        | 1134.01<br>01          | 23 |
| 3 | 315.145<br>2 | 158.076<br>2          |                      |                        |                      |                        | G        | 2213.98<br>63 | 1107.49<br>68         | 2196.95<br>98        | 1098.98<br>35          | 2195.97<br>57        | 1098.49<br>15          | 22 |
| 4 | 372.166<br>6 | 186.587<br>0          |                      |                        |                      |                        | G        | 2156.96<br>48 | 1078.98<br>61         | 2139.93<br>83        | 1070.47<br>28          | 2138.95<br>43        | 1069.98<br>08          | 21 |
| 5 | 469.219<br>4 | 235.113<br>3          |                      |                        |                      |                        | P        | 2099.94<br>34 | 1050.47<br>53         | 2082.91<br>68        | 1041.96<br>21          | 2081.93<br>28        | 1041.47<br>00          | 20 |
| 6 | 566.272<br>2 | 283.639<br>7          |                      |                        |                      |                        | P        | 2002.89<br>06 | 1001.94<br>89         | 1985.86<br>41        | 993.435<br>7           | 1984.88<br>00        | 992.943<br>7           | 19 |
| 7 | 623.293<br>6 | 312.150<br>4          |                      |                        |                      |                        | G        | 1905.83<br>79 | 953.422<br>6          | 1888.81<br>13        | 944.909<br>3           | 1887.82<br>73        | 944.417<br>3           | 18 |
| 8 | 724.341<br>3 | 362.674<br>3          |                      |                        | 706.330<br>7         | 353.669<br>0           | T        | 1848.81<br>64 | 924.911<br>8          | 1831.78<br>98        | 916.398<br>6           | 1830.80<br>58        | 915.906<br>5           | 17 |
| 9 | 781.362<br>8 | 391.185<br>0          |                      |                        | 763.352<br>2         | 382.179<br>7           | G        | 1747.76<br>87 | 874.388<br>0          | 1730.74<br>22        | 865.874<br>7           | 1729.75<br>81        | 865.382<br>7           | 16 |

|           |               |               |               |               |               |                             |          |                             |              |                            |                            |                             |                            |           |
|-----------|---------------|---------------|---------------|---------------|---------------|-----------------------------|----------|-----------------------------|--------------|----------------------------|----------------------------|-----------------------------|----------------------------|-----------|
| <b>10</b> | 838.384<br>2  | 419.695<br>8  |               |               | 820.373<br>7  | 410.690<br>5                | <b>G</b> | 1690.74<br>72               | 845.877<br>3 | 1673.72<br>07              | 837.364<br>0               | 1672.73<br>67               | 836.872<br>0               | <b>15</b> |
| <b>11</b> | 975.443<br>1  | 488.225<br>2  |               |               | 957.432<br>6  | 479.219<br>9                | <b>H</b> | 1633.72<br>58               | 817.366<br>5 | 1616.69<br>92              | 808.853<br>3               | 1615.71<br>52               | 808.361<br>2               | <b>14</b> |
| <b>12</b> | 1032.46<br>46 | 516.735<br>9  |               |               | 1014.45<br>40 | 507.730<br>7                | <b>G</b> | <b>1496.66</b><br><b>69</b> | 748.837<br>1 | 1479.64<br>03              | 740.323<br>8               | 1478.65<br>63               | 739.831<br>8               | <b>13</b> |
| <b>13</b> | 1129.51<br>74 | 565.262<br>3  |               |               | 1111.506<br>8 | 556.257<br>0                | <b>P</b> | <b>1439.64</b><br><b>54</b> | 720.326<br>3 | 1422.61<br>89              | 711.813<br>1               | 1421.63<br>48               | 711.3211                   | <b>12</b> |
| <b>14</b> | 1242.60<br>14 | 621.804<br>4  |               |               | 1224.59<br>09 | 612.799<br>1                | <b>L</b> | 1342.59<br>26               | 671.800<br>0 | 1325.56<br>61              | 663.286<br>7               | 1324.58<br>21               | 662.794<br>7               | <b>11</b> |
| <b>15</b> | 1329.63<br>35 | 665.320<br>4  |               |               | 1311.62<br>29 | 656.315<br>1                | <b>S</b> | <b>1229.50</b><br><b>86</b> | 615.257<br>9 | 1212.48<br>20              | 606.744<br>7               | 1211.49<br>80               | 606.252<br>6               | <b>10</b> |
| <b>16</b> | 1442.71<br>75 | 721.862<br>4  |               |               | 1424.70<br>70 | 712.857<br>1                | <b>L</b> | 1142.47<br>65               | 571.741<br>9 | 1125.45<br>00              | 563.228<br>6               | <b>1124.46</b><br><b>60</b> | 562.736<br>6               | <b>9</b>  |
| <b>17</b> | 1556.76<br>05 | 778.883<br>9  | 1539.73<br>39 | 770.370<br>6  | 1538.74<br>99 | 769.878<br>6                | <b>N</b> | 1029.39<br>25               | 515.199<br>9 | 1012.36<br>59              | 506.686<br>6               | 1011.38<br>19               | 506.194<br>6               | <b>8</b>  |
| <b>18</b> | 1723.75<br>88 | 862.383<br>0  | 1706.73<br>23 | 853.869<br>8  | 1705.74<br>82 | 853.377<br>8                | <b>S</b> | <b>915.349</b><br><b>6</b>  | 458.178<br>4 | 898.323<br>0               | 449.665<br>1               | <b>897.339</b><br><b>0</b>  | <b>449.173</b><br><b>1</b> | <b>7</b>  |
| <b>19</b> | 1820.81<br>16 | 910.909<br>4  | 1803.78<br>50 | 902.396<br>2  | 1802.80<br>10 | 901.904<br>1                | <b>P</b> | <b>748.351</b><br><b>2</b>  | 374.679<br>2 | 731.324<br>6               | <b>366.166</b><br><b>0</b> | 730.340<br>6                | 365.674<br>0               | <b>6</b>  |
| <b>20</b> | 1935.83<br>85 | 968.422<br>9  | 1918.81<br>20 | 959.909<br>6  | 1917.82<br>80 | 959.417<br>6                | <b>D</b> | <b>651.298</b><br><b>4</b>  | 326.152<br>9 | 634.271<br>9               | 317.639<br>6               | 633.287<br>9                | 317.147<br>6               | <b>5</b>  |
| <b>21</b> | 2032.89<br>13 | 1016.94<br>93 | 2015.86<br>47 | 1008.43<br>60 | 2014.88<br>07 | 1007.94<br>40               | <b>P</b> | <b>536.271</b><br><b>5</b>  | 268.639<br>4 | 519.244<br>9               | 260.126<br>1               | <b>518.260</b><br><b>9</b>  | 259.634<br>1               | <b>4</b>  |
| <b>22</b> | 2195.95<br>46 | 1098.48<br>09 | 2178.92<br>81 | 1089.96<br>77 | 2177.94<br>40 | 1089.47<br>57               | <b>Y</b> | <b>439.218</b><br><b>7</b>  | 220.113<br>0 | 422.192<br>2               | 211.599<br>7               | 421.208<br>2                | 211.107<br>7               | <b>3</b>  |
| <b>23</b> | 2324.99<br>72 | 1163.00<br>22 | 2307.97<br>07 | 1154.48<br>90 | 2306.98<br>66 | <b>1153.99</b><br><b>70</b> | <b>E</b> | <b>276.155</b><br><b>4</b>  | 138.581<br>3 | 259.128<br>8               | <b>130.068</b><br><b>1</b> | <b>258.144</b><br><b>8</b>  | 129.576<br>1               | <b>2</b>  |
| <b>24</b> |               |               |               |               |               |                             | <b>K</b> | <b>147.112</b><br><b>8</b>  | 74.0600      | <b>130.086</b><br><b>3</b> | 65.5468                    |                             |                            | <b>1</b>  |

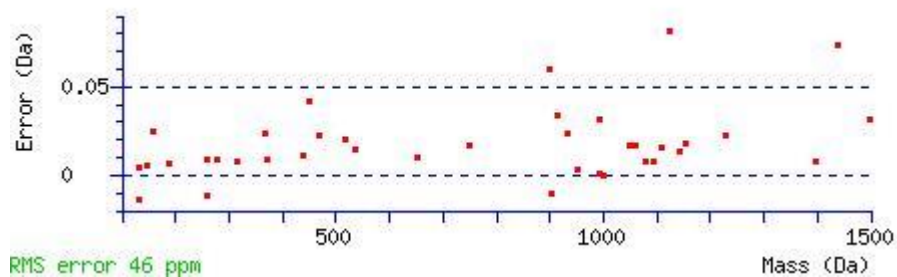

12\_MS/MS Fragmentation of **ALEDPEGELSGSESGDSDGR**Found in **O95180**, Voltage-dependent T-type calcium channel subunit alpha-1H OS=Homo sapiens GN=CACNA1H PE=1 SV=4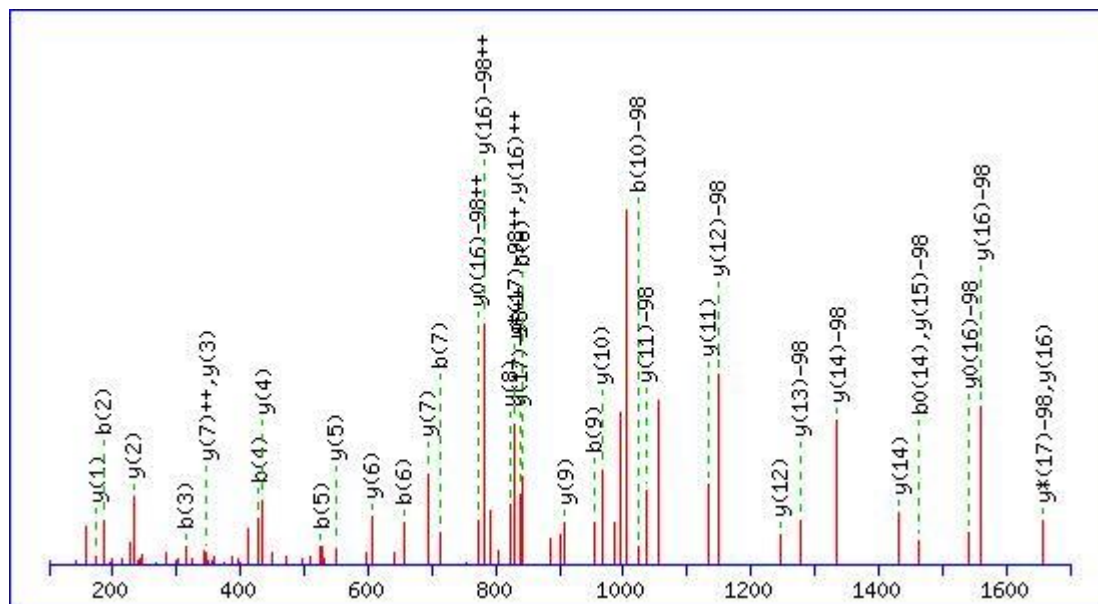

Monoisotopic mass of neutral peptide Mr(calc): 2085.8012

Variable modifications:

S10 : Phospho (ST), with neutral losses 97.9769(shown in table), 0.0000

Ions Score: 128 Expect: 2.7e-010

Matches : 38/276 fragment ions using 50 most intense peaks ([help](#))

| #  | b         | b <sup>++</sup> | b <sup>0</sup> | b <sup>0++</sup> | Seq. | y         | y <sup>++</sup> | y <sup>*</sup> | y <sup>***</sup> | y <sup>0</sup> | y <sup>0++</sup> | #  |
|----|-----------|-----------------|----------------|------------------|------|-----------|-----------------|----------------|------------------|----------------|------------------|----|
| 1  | 72.0444   | 36.5258         |                |                  | A    |           |                 |                |                  |                |                  | 20 |
| 2  | 185.1285  | 93.0679         |                |                  | L    | 1917.7944 | 959.4009        | 1900.7679      | 950.8876         | 1899.7839      | 950.3956         | 19 |
| 3  | 314.1710  | 157.5892        | 296.1605       | 148.5839         | E    | 1804.7104 | 902.8588        | 1787.6838      | 894.3456         | 1786.6998      | 893.8535         | 18 |
| 4  | 429.1980  | 215.1026        | 411.1874       | 206.0974         | D    | 1675.6678 | 838.3375        | 1658.6412      | 829.8243         | 1657.6572      | 829.3323         | 17 |
| 5  | 526.2508  | 263.6290        | 508.2402       | 254.6237         | P    | 1560.6408 | 780.8241        | 1543.6143      | 772.3108         | 1542.6303      | 771.8188         | 16 |
| 6  | 655.2933  | 328.1503        | 637.2828       | 319.1450         | E    | 1463.5881 | 732.2977        | 1446.5615      | 723.7844         | 1445.5775      | 723.2924         | 15 |
| 7  | 712.3148  | 356.6610        | 694.3042       | 347.6558         | G    | 1334.5455 | 667.7764        | 1317.5189      | 659.2631         | 1316.5349      | 658.7711         | 14 |
| 8  | 841.3574  | 421.1823        | 823.3468       | 412.1771         | E    | 1277.5240 | 639.2657        | 1260.4975      | 630.7524         | 1259.5135      | 630.2604         | 13 |
| 9  | 954.4415  | 477.7244        | 936.4309       | 468.7191         | L    | 1148.4814 | 574.7444        | 1131.4549      | 566.2311         | 1130.4709      | 565.7391         | 12 |
| 10 | 1023.4629 | 512.2351        | 1005.4524      | 503.2298         | S    | 1035.3974 | 518.2023        | 1018.3708      | 509.6890         | 1017.3868      | 509.1970         | 11 |
| 11 | 1080.4844 | 540.7458        | 1062.4738      | 531.7406         | G    | 966.3759  | 483.6916        | 949.3494       | 475.1783         | 948.3653       | 474.6863         | 10 |
| 12 | 1167.5164 | 584.2618        | 1149.5059      | 575.2566         | S    | 909.3544  | 455.1809        | 892.3279       | 446.6676         | 891.3439       | 446.1756         | 9  |
| 13 | 1296.5590 | 648.7831        | 1278.5485      | 639.7779         | E    | 822.3224  | 411.6648        | 805.2959       | 403.1516         | 804.3119       | 402.6596         | 8  |
| 14 | 1383.5910 | 692.2992        | 1365.5805      | 683.2939         | S    | 693.2798  | 347.1435        | 676.2533       | 338.6303         | 675.2693       | 338.1383         | 7  |
| 15 | 1440.6125 | 720.8099        | 1422.6019      | 711.8046         | G    | 606.2478  | 303.6275        | 589.2212       | 295.1143         | 588.2372       | 294.6223         | 6  |
| 16 | 1555.6395 | 778.3234        | 1537.6289      | 769.3181         | D    | 549.2263  | 275.1168        | 532.1998       | 266.6035         | 531.2158       | 266.1115         | 5  |
| 17 | 1642.6715 | 821.8394        | 1624.6609      | 812.8341         | S    | 434.1994  | 217.6033        | 417.1728       | 209.0901         | 416.1888       | 208.5980         | 4  |

|    |           |          |           |          |   |          |          |          |          |          |          |   |
|----|-----------|----------|-----------|----------|---|----------|----------|----------|----------|----------|----------|---|
| 18 | 1757.6984 | 879.3528 | 1739.6879 | 870.3476 | D | 347.1674 | 174.0873 | 330.1408 | 165.5740 | 329.1568 | 165.0820 | 3 |
| 19 | 1814.7199 | 907.8636 | 1796.7093 | 898.8583 | G | 232.1404 | 116.5738 | 215.1139 | 108.0606 |          |          | 2 |
| 20 |           |          |           |          | R | 175.1190 | 88.0631  | 158.0924 | 79.5498  |          |          | 1 |

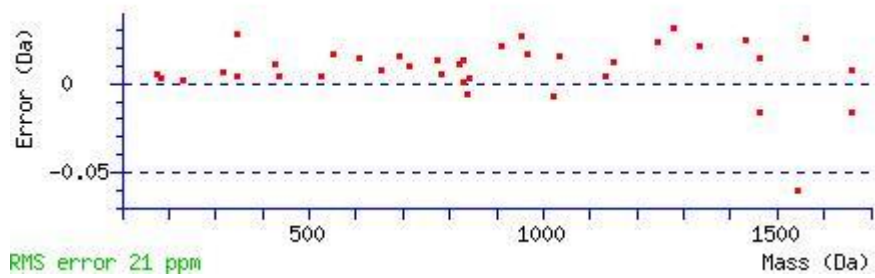

13\_MS/MS Fragmentation of **ALEDPEGELSGSESGDSDGR**

Found in **O95180**, Voltage-dependent T-type calcium channel subunit alpha-1H OS=Homo sapiens GN=CACNA1H PE=1 SV=4

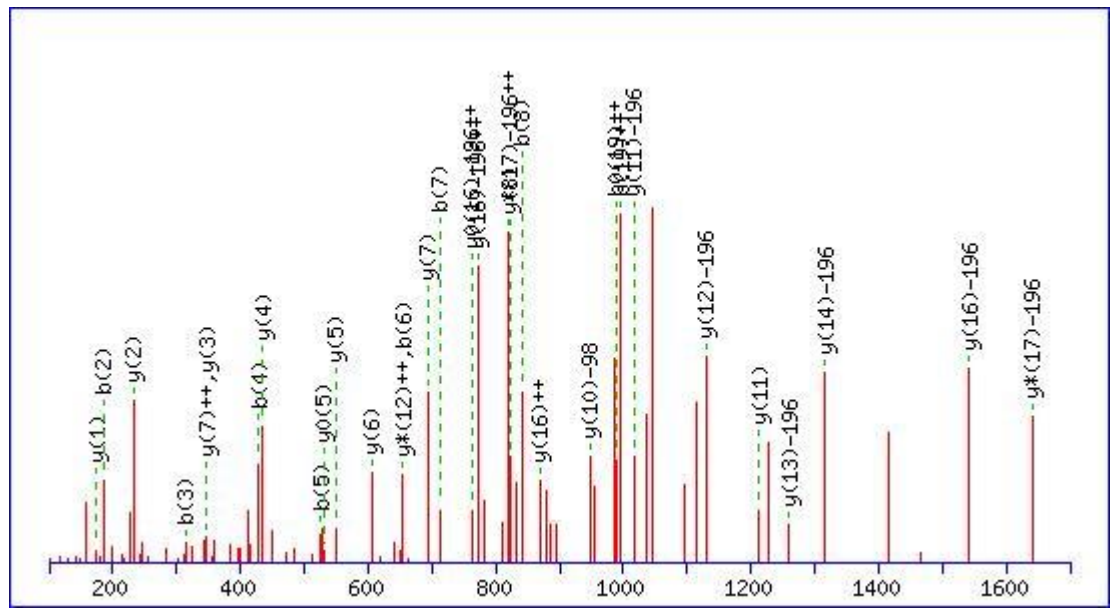

Monoisotopic mass of neutral peptide Mr(calc): 2165.7675

Variable modifications:

S10 : Phospho (ST), with neutral losses 97.9769(shown in table), 0.0000

S12 : Phospho (ST), with neutral losses 97.9769(shown in table), 0.0000

Ions Score: 93 Expect: 6.1e-007

Matches : 32/288 fragment ions using 50 most intense peaks ([help](#))

| #  | b         | b <sup>++</sup> | b <sup>0</sup> | b <sup>0++</sup> | Seq. | y         | y <sup>++</sup> | y <sup>*</sup> | y <sup>*++</sup> | y <sup>0</sup> | y <sup>0++</sup> | #  |
|----|-----------|-----------------|----------------|------------------|------|-----------|-----------------|----------------|------------------|----------------|------------------|----|
| 1  | 72.0444   | 36.5258         |                |                  | A    |           |                 |                |                  |                |                  | 20 |
| 2  | 185.1285  | 93.0679         |                |                  | L    | 1899.7839 | 950.3956        | 1882.7573      | 941.8823         | 1881.7733      | 941.3903         | 19 |
| 3  | 314.1710  | 157.5892        | 296.1605       | 148.5839         | E    | 1786.6998 | 893.8535        | 1769.6733      | 885.3403         | 1768.6893      | 884.8483         | 18 |
| 4  | 429.1980  | 215.1026        | 411.1874       | 206.0974         | D    | 1657.6572 | 829.3323        | 1640.6307      | 820.8190         | 1639.6467      | 820.3270         | 17 |
| 5  | 526.2508  | 263.6290        | 508.2402       | 254.6237         | P    | 1542.6303 | 771.8188        | 1525.6037      | 763.3055         | 1524.6197      | 762.8135         | 16 |
| 6  | 655.2933  | 328.1503        | 637.2828       | 319.1450         | E    | 1445.5775 | 723.2924        | 1428.5510      | 714.7791         | 1427.5670      | 714.2871         | 15 |
| 7  | 712.3148  | 356.6610        | 694.3042       | 347.6558         | G    | 1316.5349 | 658.7711        | 1299.5084      | 650.2578         | 1298.5244      | 649.7658         | 14 |
| 8  | 841.3574  | 421.1823        | 823.3468       | 412.1771         | E    | 1259.5135 | 630.2604        | 1242.4869      | 621.7471         | 1241.5029      | 621.2551         | 13 |
| 9  | 954.4415  | 477.7244        | 936.4309       | 468.7191         | L    | 1130.4709 | 565.7391        | 1113.4443      | 557.2258         | 1112.4603      | 556.7338         | 12 |
| 10 | 1023.4629 | 512.2351        | 1005.4524      | 503.2298         | S    | 1017.3868 | 509.1970        | 1000.3603      | 500.6838         | 999.3762       | 500.1918         | 11 |
| 11 | 1080.4844 | 540.7458        | 1062.4738      | 531.7406         | G    | 948.3653  | 474.6863        | 931.3388       | 466.1730         | 930.3548       | 465.6810         | 10 |
| 12 | 1149.5059 | 575.2566        | 1131.4953      | 566.2513         | S    | 891.3439  | 446.1756        | 874.3173       | 437.6623         | 873.3333       | 437.1703         | 9  |
| 13 | 1278.5485 | 639.7779        | 1260.5379      | 630.7726         | E    | 822.3224  | 411.6648        | 805.2959       | 403.1516         | 804.3119       | 402.6596         | 8  |
| 14 | 1365.5805 | 683.2939        | 1347.5699      | 674.2886         | S    | 693.2798  | 347.1435        | 676.2533       | 338.6303         | 675.2693       | 338.1383         | 7  |
| 15 | 1422.6019 | 711.8046        | 1404.5914      | 702.7993         | G    | 606.2478  | 303.6275        | 589.2212       | 295.1143         | 588.2372       | 294.6223         | 6  |
| 16 | 1537.6289 | 769.3181        | 1519.6183      | 760.3128         | D    | 549.2263  | 275.1168        | 532.1998       | 266.6035         | 531.2158       | 266.1115         | 5  |
| 17 | 1624.6609 | 812.8341        | 1606.6503      | 803.8288         | S    | 434.1994  | 217.6033        | 417.1728       | 209.0901         | 416.1888       | 208.5980         | 4  |

|    |           |          |           |          |   |          |          |          |          |          |          |   |
|----|-----------|----------|-----------|----------|---|----------|----------|----------|----------|----------|----------|---|
| 18 | 1739.6879 | 870.3476 | 1721.6773 | 861.3423 | D | 347.1674 | 174.0873 | 330.1408 | 165.5740 | 329.1568 | 165.0820 | 3 |
| 19 | 1796.7093 | 898.8583 | 1778.6988 | 889.8530 | G | 232.1404 | 116.5738 | 215.1139 | 108.0606 |          |          | 2 |
| 20 |           |          |           |          | R | 175.1190 | 88.0631  | 158.0924 | 79.5498  |          |          | 1 |

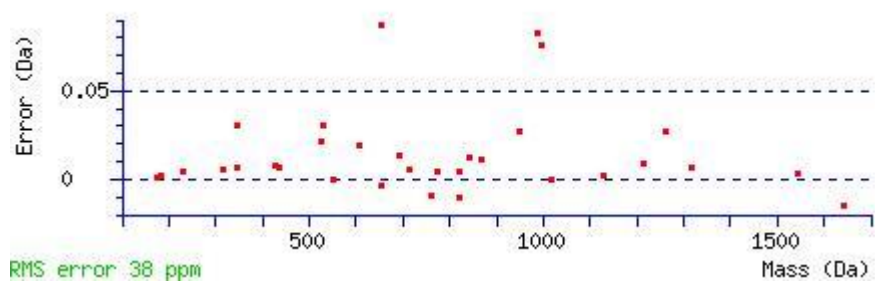

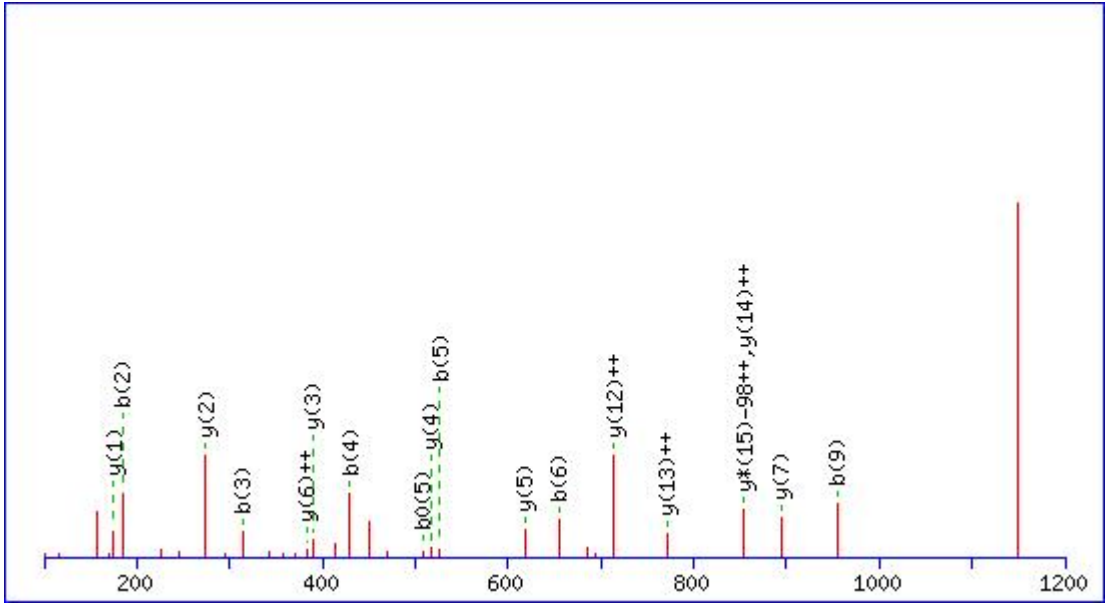

Monoisotopic mass of neutral peptide Mr(calc): 3520.2671

Variable modifications:

- S10 : Phospho (ST), with neutral losses 0.0000(shown in table), 97.9769
- S12 : Phospho (ST), with neutral losses 0.0000(shown in table), 97.9769
- S14 : Phospho (ST), with neutral losses 0.0000(shown in table), 97.9769
- S17 : Phospho (ST), with neutral losses 0.0000(shown in table), 97.9769

Ions Score: 54 Expect: 0.0059

Matches : 18/498 fragment ions using 24 most intense peaks ([help](#))

| # | b        | b <sup>++</sup> | b <sup>*</sup> | b <sup>+++</sup> | b <sup>0</sup> | b <sup>0++</sup> | Seq | y         | y <sup>++</sup> | y <sup>*</sup> | y <sup>+++</sup> | y <sup>0</sup> | y <sup>0++</sup> | #  |
|---|----------|-----------------|----------------|------------------|----------------|------------------|-----|-----------|-----------------|----------------|------------------|----------------|------------------|----|
| 1 | 72.0444  | 36.5258         |                |                  |                |                  | A   |           |                 |                |                  |                |                  | 30 |
| 2 | 185.1285 | 93.0679         |                |                  |                |                  | L   | 3450.2373 | 1725.6223       | 3433.2107      | 1717.1090        | 3432.2267      | 1716.6170        | 29 |
| 3 | 314.1710 | 157.5892        |                |                  | 296.1605       | 148.5839         | E   | 3337.1532 | 1669.0802       | 3320.1267      | 1660.5670        | 3319.1426      | 1660.0750        | 28 |
| 4 | 429.1980 | 215.1026        |                |                  | 411.1874       | 206.0974         | D   | 3208.1106 | 1604.5589       | 3191.0841      | 1596.0457        | 3190.1001      | 1595.5537        | 27 |
| 5 | 526.2508 | 263.6290        |                |                  | 508.2402       | 254.6237         | P   | 3093.0837 | 1547.0455       | 3076.0571      | 1538.5322        | 3075.0731      | 1538.0402        | 26 |
| 6 | 655.2933 | 328.1503        |                |                  | 637.2828       | 319.1450         | E   | 2996.0309 | 1498.5191       | 2979.0044      | 1490.0058        | 2978.0203      | 1489.5138        | 25 |
| 7 | 712.3148 | 356.6610        |                |                  | 694.3042       | 347.6558         | G   | 2866.9883 | 1433.9978       | 2849.9618      | 1425.4845        | 2848.9778      | 1424.9925        | 24 |
| 8 | 841.3574 | 421.1823        |                |                  | 823.3468       | 412.1771         | E   | 2809.9669 | 1405.4871       | 2792.9403      | 1396.9738        | 2791.9563      | 1396.4818        | 23 |

|        |               |               |               |               |               |               |   |               |               |               |               |               |               |        |
|--------|---------------|---------------|---------------|---------------|---------------|---------------|---|---------------|---------------|---------------|---------------|---------------|---------------|--------|
| 9      | 954.441<br>5  | 477.724<br>4  |               |               | 936.430<br>9  | 468.719<br>1  | L | 2680.92<br>43 | 1340.96<br>58 | 2663.89<br>77 | 1332.45<br>25 | 2662.91<br>37 | 1331.96<br>05 | 2<br>2 |
| 1<br>0 | 1121.43<br>98 | 561.223<br>6  |               |               | 1103.42<br>93 | 552.218<br>3  | S | 2567.84<br>02 | 1284.42<br>37 | 2550.81<br>36 | 1275.91<br>05 | 2549.82<br>96 | 1275.41<br>85 | 2<br>1 |
| 1<br>1 | 1178.46<br>13 | 589.734<br>3  |               |               | 1160.45<br>07 | 580.729<br>0  | G | 2400.84<br>18 | 1200.92<br>46 | 2383.81<br>53 | 1192.411<br>3 | 2382.83<br>13 | 1191.91<br>93 | 2<br>0 |
| 1<br>2 | 1345.45<br>97 | 673.233<br>5  |               |               | 1327.44<br>91 | 664.228<br>2  | S | 2343.82<br>04 | 1172.41<br>38 | 2326.79<br>38 | 1163.90<br>06 | 2325.80<br>98 | 1163.40<br>85 | 1<br>9 |
| 1<br>3 | 1474.50<br>22 | 737.754<br>8  |               |               | 1456.49<br>17 | 728.749<br>5  | E | 2176.82<br>20 | 1088.91<br>46 | 2159.79<br>55 | 1080.40<br>14 | 2158.81<br>15 | 1079.90<br>94 | 1<br>8 |
| 1<br>4 | 1641.50<br>06 | 821.253<br>9  |               |               | 1623.49<br>00 | 812.248<br>7  | S | 2047.77<br>94 | 1024.39<br>33 | 2030.75<br>29 | 1015.88<br>01 | 2029.76<br>89 | 1015.38<br>81 | 1<br>7 |
| 1<br>5 | 1698.52<br>21 | 849.764<br>7  |               |               | 1680.51<br>15 | 840.759<br>4  | G | 1880.78<br>11 | 940.894<br>2  | 1863.75<br>45 | 932.380<br>9  | 1862.77<br>05 | 931.888<br>9  | 1<br>6 |
| 1<br>6 | 1813.54<br>90 | 907.278<br>1  |               |               | 1795.53<br>84 | 898.272<br>9  | D | 1823.75<br>96 | 912.383<br>4  | 1806.73<br>31 | 903.870<br>2  | 1805.74<br>90 | 903.378<br>2  | 1<br>5 |
| 1<br>7 | 1980.54<br>74 | 990.777<br>3  |               |               | 1962.53<br>68 | 981.772<br>0  | S | 1708.73<br>27 | 854.870<br>0  | 1691.70<br>61 | 846.356<br>7  | 1690.72<br>21 | 845.864<br>7  | 1<br>4 |
| 1<br>8 | 2095.57<br>43 | 1048.29<br>08 |               |               | 2077.56<br>37 | 1039.28<br>55 | D | 1541.73<br>43 | 771.370<br>8  | 1524.70<br>77 | 762.857<br>5  | 1523.72<br>37 | 762.365<br>5  | 1<br>3 |
| 1<br>9 | 2152.59<br>58 | 1076.80<br>15 |               |               | 2134.58<br>52 | 1067.79<br>62 | G | 1426.70<br>74 | 713.857<br>3  | 1409.68<br>08 | 705.344<br>0  | 1408.69<br>68 | 704.852<br>0  | 1<br>2 |
| 2<br>0 | 2308.69<br>69 | 1154.85<br>21 | 2291.67<br>03 | 1146.33<br>88 | 2290.68<br>63 | 1145.84<br>68 | R | 1369.68<br>59 | 685.346<br>6  | 1352.65<br>93 | 676.833<br>3  | 1351.67<br>53 | 676.341<br>3  | 1<br>1 |
| 2<br>1 | 2365.71<br>84 | 1183.36<br>28 | 2348.69<br>18 | 1174.84<br>95 | 2347.70<br>78 | 1174.35<br>75 | G | 1213.58<br>48 | 607.296<br>0  | 1196.55<br>82 | 598.782<br>8  | 1195.57<br>42 | 598.290<br>7  | 1<br>0 |
| 2<br>2 | 2464.78<br>68 | 1232.89<br>70 | 2447.76<br>02 | 1224.38<br>37 | 2446.77<br>62 | 1223.89<br>17 | V | 1156.56<br>33 | 578.785<br>3  | 1139.53<br>68 | 570.272<br>0  | 1138.55<br>28 | 569.780<br>0  | 9      |
| 2<br>3 | 2627.85<br>01 | 1314.42<br>87 | 2610.82<br>35 | 1305.91<br>54 | 2609.83<br>95 | 1305.42<br>34 | Y | 1057.49<br>49 | 529.251<br>1  | 1040.46<br>84 | 520.737<br>8  | 1039.48<br>43 | 520.245<br>8  | 8      |
| 2<br>4 | 2756.89<br>27 | 1378.95<br>00 | 2739.86<br>61 | 1370.43<br>67 | 2738.88<br>21 | 1369.94<br>47 | E | 894.431<br>6  | 447.719<br>4  | 877.405<br>0  | 439.206<br>1  | 876.421<br>0  | 438.714<br>1  | 7      |
| 2<br>5 | 2903.96<br>11 | 1452.48<br>42 | 2886.93<br>46 | 1443.97<br>09 | 2885.95<br>05 | 1443.47<br>89 | F | 765.389<br>0  | 383.198<br>1  | 748.362<br>4  | 374.684<br>9  | 747.378<br>4  | 374.192<br>8  | 6      |
| 2<br>6 | 3005.00<br>88 | 1503.00<br>80 | 2987.98<br>22 | 1494.49<br>48 | 2986.99<br>82 | 1494.00<br>27 | T | 618.320<br>6  | 309.663<br>9  | 601.294<br>0  | 301.150<br>6  | 600.310<br>0  | 300.658<br>6  | 5      |
| 2<br>7 | 3133.06<br>74 | 1567.03<br>73 | 3116.04<br>08 | 1558.52<br>40 | 3115.05<br>68 | 1558.03<br>20 | Q | 517.272<br>9  | 259.140<br>1  | 500.246<br>3  | 250.626<br>8  | 499.262<br>3  | 250.134<br>8  | 4      |

|           |           |           |           |           |           |           |          |                 |          |          |          |          |          |          |
|-----------|-----------|-----------|-----------|-----------|-----------|-----------|----------|-----------------|----------|----------|----------|----------|----------|----------|
| <b>28</b> | 3248.0943 | 1624.5508 | 3231.0678 | 1616.0375 | 3230.0837 | 1615.5455 | <b>D</b> | <b>389.2143</b> | 195.1108 | 372.1878 | 186.5975 | 371.2037 | 186.1055 | <b>3</b> |
| <b>29</b> | 3347.1627 | 1674.0850 | 3330.1362 | 1665.5717 | 3329.1521 | 1665.0797 | <b>V</b> | <b>274.1874</b> | 137.5973 | 257.1608 | 129.0840 |          |          | <b>2</b> |
| <b>30</b> |           |           |           |           |           |           | <b>R</b> | <b>175.1190</b> | 88.0631  | 158.0924 | 79.5498  |          |          | <b>1</b> |

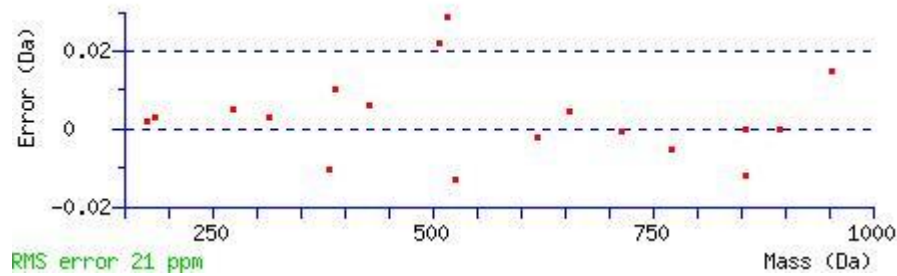

15\_MS/MS Fragmentation of **ATDTPGPGPGSPQR**

Found in **O95180**, Voltage-dependent T-type calcium channel subunit alpha-1H OS=Homo sapiens GN=CACNA1H PE=1 SV=4

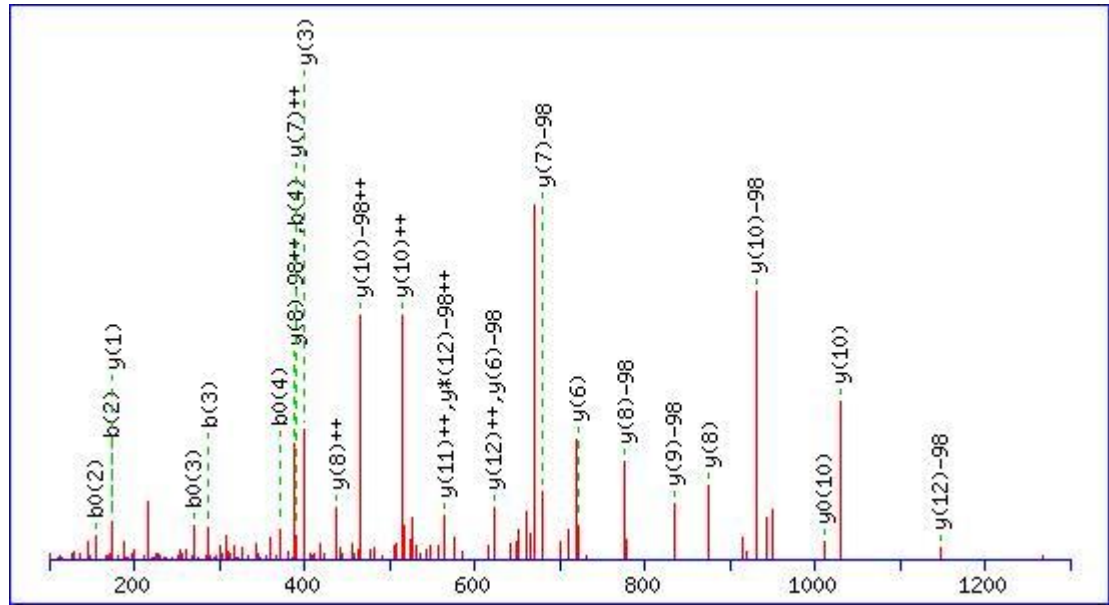

Monoisotopic mass of neutral peptide Mr(calc): 1416.6035

Variable modifications:

S11 : Phospho (ST), with neutral losses 97.9769(shown in table), 0.0000

Ions Score: 47 Expect: 0.039

Matches : 26/198 fragment ions using 30 most intense peaks ([help](#))

| # | b        | b <sup>++</sup> | b <sup>*</sup> | b <sup>***</sup> | b <sup>0</sup> | b <sup>0++</sup> | Seq | y             | y <sup>++</sup> | y <sup>*</sup> | y <sup>***</sup> | y <sup>0</sup> | y <sup>0++</sup> | # |
|---|----------|-----------------|----------------|------------------|----------------|------------------|-----|---------------|-----------------|----------------|------------------|----------------|------------------|---|
| 1 | 72.0444  | 36.5258         |                |                  |                |                  | A   |               |                 |                |                  |                |                  | 1 |
| 2 | 173.0921 | 87.0497         |                |                  | 155.0815       | 78.0444          | T   | 1248.596<br>7 | 624.802<br>0    | 1231.570<br>2  | 616.288<br>7     | 1230.586<br>2  | 615.796<br>7     | 1 |
| 3 | 288.1190 | 144.563<br>1    |                |                  | 270.1084       | 135.557<br>9     | D   | 1147.549<br>1 | 574.278<br>2    | 1130.522<br>5  | 565.764<br>9     | 1129.538<br>5  | 565.272<br>9     | 1 |
| 4 | 389.1667 | 195.087<br>0    |                |                  | 371.1561       | 186.081<br>7     | T   | 1032.522<br>1 | 516.764<br>7    | 1015.495<br>6  | 508.251<br>4     | 1014.511<br>6  | 507.759<br>4     | 1 |
| 5 | 486.2195 | 243.613<br>4    |                |                  | 468.2089       | 234.608<br>1     | P   | 931.4744      | 466.240<br>9    | 914.4479       | 457.727<br>6     | 913.4639       | 457.235<br>6     | 1 |
| 6 | 543.2409 | 272.124<br>1    |                |                  | 525.2304       | 263.118<br>8     | G   | 834.4217      | 417.714<br>5    | 817.3951       | 409.201<br>2     | 816.4111       | 408.709<br>2     | 9 |
| 7 | 640.2937 | 320.650<br>5    |                |                  | 622.2831       | 311.645<br>2     | P   | 777.4002      | 389.203<br>7    | 760.3737       | 380.690<br>5     | 759.3896       | 380.198<br>5     | 8 |
| 8 | 697.3151 | 349.161<br>2    |                |                  | 679.3046       | 340.155<br>9     | G   | 680.3474      | 340.677<br>4    | 663.3209       | 332.164<br>1     | 662.3369       | 331.672<br>1     | 7 |
| 9 | 794.3679 | 397.687<br>6    |                |                  | 776.3573       | 388.682<br>3     | P   | 623.3260      | 312.166<br>6    | 606.2994       | 303.653<br>4     | 605.3154       | 303.161<br>3     | 6 |

|    |           |          |           |          |           |          |   |          |          |          |          |          |          |   |
|----|-----------|----------|-----------|----------|-----------|----------|---|----------|----------|----------|----------|----------|----------|---|
| 10 | 851.3894  | 426.1983 |           |          | 833.3788  | 417.1930 | G | 526.2732 | 263.6402 | 509.2467 | 255.1270 | 508.2627 | 254.6350 | 5 |
| 11 | 920.4108  | 460.7091 |           |          | 902.4003  | 451.7038 | S | 469.2518 | 235.1295 | 452.2252 | 226.6162 | 451.2412 | 226.1242 | 4 |
| 12 | 1017.4636 | 509.2354 |           |          | 999.4530  | 500.2302 | P | 400.2303 | 200.6188 | 383.2037 | 192.1055 |          |          | 3 |
| 13 | 1145.5222 | 573.2647 | 1128.4956 | 564.7515 | 1127.5116 | 564.2594 | Q | 303.1775 | 152.0924 | 286.1510 | 143.5791 |          |          | 2 |
| 14 |           |          |           |          |           |          | R | 175.1190 | 88.0631  | 158.0924 | 79.5498  |          |          | 1 |

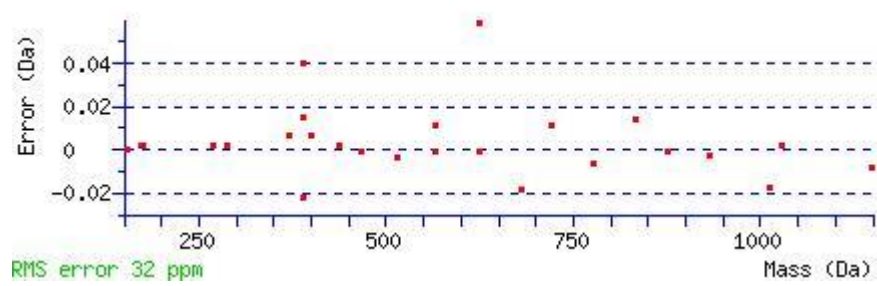

Found in **O95180**, Voltage-dependent T-type calcium channel subunit alpha-1H OS=Homo sapiens GN=CACNA1H PE=1 SV=4

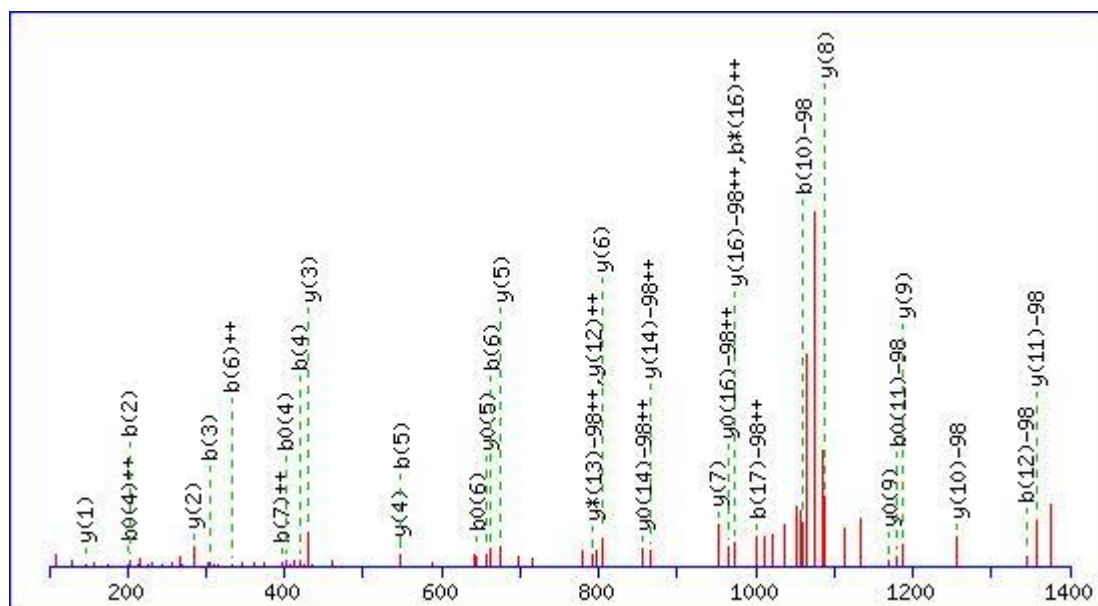

Variable modifications:

Ions Score: 69 Expect: 0.00029

**Matches** : 34/288 fragment ions using 63 most intense peaks ([help](#))

| # | <b>b</b> | <b>b<sup>++</sup></b> | <b>b*</b> | <b>b<sup>*++</sup></b> | <b>b<sup>0</sup></b> | <b>b<sup>0++</sup></b> | Seq<br>. | <b>y</b>      | <b>y<sup>++</sup></b> | <b>y*</b>     | <b>y<sup>*++</sup></b> | <b>y<sup>0</sup></b> | <b>y<sup>0++</sup></b> | #  |
|---|----------|-----------------------|-----------|------------------------|----------------------|------------------------|----------|---------------|-----------------------|---------------|------------------------|----------------------|------------------------|----|
| 1 | 88.0393  | 44.5233               |           |                        | 70.0287              | 35.5180                | S        |               |                       |               |                        |                      |                        | 18 |
| 2 | 203.0662 | 102.0368              |           |                        | 185.0557             | 93.0315                | D        | 2060.883<br>2 | 1030.945<br>2         | 2043.856<br>7 | 1022.432<br>0          | 2042.872<br>6        | 1021.940<br>0          | 17 |
| 3 | 304.1139 | 152.5606              |           |                        | 286.1034             | 143.555<br>3           | T        | 1945.856<br>3 | 973.4318              | 1928.829<br>7 | 964.9185               | 1927.845<br>7        | 964.4265               | 16 |
| 4 | 419.1409 | 210.0741              |           |                        | 401.1303             | 201.068<br>8           | D        | 1844.808<br>6 | 922.9079              | 1827.782<br>0 | 914.3947               | 1826.798<br>0        | 913.9026               | 15 |
| 5 | 548.1835 | 274.5954              |           |                        | 530.1729             | 265.590<br>1           | E        | 1729.781<br>6 | 865.3945              | 1712.755<br>1 | 856.8812               | 1711.771<br>1        | 856.3892               | 14 |
| 6 | 663.2104 | 332.1088              |           |                        | 645.1998             | 323.103<br>6           | D        | 1600.739<br>0 | 800.8732              | 1583.712<br>5 | 792.3599               | 1582.728<br>5        | 791.8679               | 13 |
| 7 | 791.3054 | 396.1563              | 774.2788  | 387.643<br>0           | 773.2948             | 387.151<br>0           | K        | 1485.712<br>1 | 743.3597              | 1468.685<br>6 | 734.8464               | 1467.701<br>5        | 734.3544               | 12 |
| 8 | 892.3530 | 446.6802              | 875.3265  | 438.166<br>9           | 874.3425             | 437.674<br>9           | T        | 1357.617<br>1 | 679.3122              | 1340.590<br>6 | 670.7989               | 1339.606<br>6        | 670.3069               | 11 |
| 9 | 961.3745 | 481.1909              | 944.3480  | 472.677<br>6           | 943.3639             | 472.185<br>6           | S        | 1256.569<br>5 | 628.7884              | 1239.542<br>9 | 620.2751               | 1238.558<br>9        | 619.7831               | 10 |

|    |           |           |           |          |           |          |   |           |          |           |          |           |          |   |
|----|-----------|-----------|-----------|----------|-----------|----------|---|-----------|----------|-----------|----------|-----------|----------|---|
| 10 | 1060.4429 | 530.7251  | 1043.4164 | 522.2118 | 1042.4324 | 521.7198 | V | 1187.5480 | 594.2776 | 1170.5215 | 585.7644 | 1169.5374 | 585.2724 | 9 |
| 11 | 1197.5018 | 599.2546  | 1180.4753 | 590.7413 | 1179.4913 | 590.2493 | H | 1088.4796 | 544.7434 | 1071.4530 | 536.2302 | 1070.4690 | 535.7381 | 8 |
| 12 | 1344.5703 | 672.7888  | 1327.5437 | 664.2755 | 1326.5597 | 663.7835 | F | 951.4207  | 476.2140 | 934.3941  | 467.7007 | 933.4101  | 467.2087 | 7 |
| 13 | 1473.6128 | 737.3101  | 1456.5863 | 728.7968 | 1455.6023 | 728.3048 | E | 804.3523  | 402.6798 | 787.3257  | 394.1665 | 786.3417  | 393.6745 | 6 |
| 14 | 1602.6554 | 801.8314  | 1585.6289 | 793.3181 | 1584.6449 | 792.8261 | E | 675.3097  | 338.1585 | 658.2831  | 329.6452 | 657.2991  | 329.1532 | 5 |
| 15 | 1717.6824 | 859.3448  | 1700.6558 | 850.8316 | 1699.6718 | 850.3395 | D | 546.2671  | 273.6372 | 529.2405  | 265.1239 | 528.2565  | 264.6319 | 4 |
| 16 | 1864.7508 | 932.8790  | 1847.7242 | 924.3658 | 1846.7402 | 923.8738 | F | 431.2401  | 216.1237 | 414.2136  | 207.6104 |           |          | 3 |
| 17 | 2001.8097 | 1001.4085 | 1984.7832 | 992.8952 | 1983.7991 | 992.4032 | H | 284.1717  | 142.5895 | 267.1452  | 134.0762 |           |          | 2 |
| 18 |           |           |           |          |           |          | K | 147.1128  | 74.0600  | 130.0863  | 65.5468  |           |          | 1 |

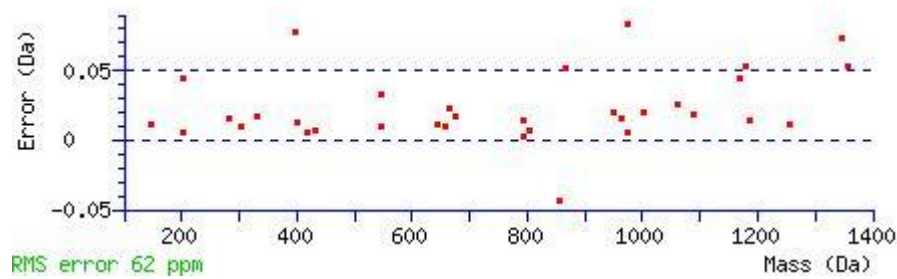

17\_MS/MS Fragmentation of **SSPFLDAAPSLPDSR**

Found in **O95180**, Voltage-dependent T-type calcium channel subunit alpha-1H OS=Homo sapiens GN=CACNA1H PE=1 SV=4

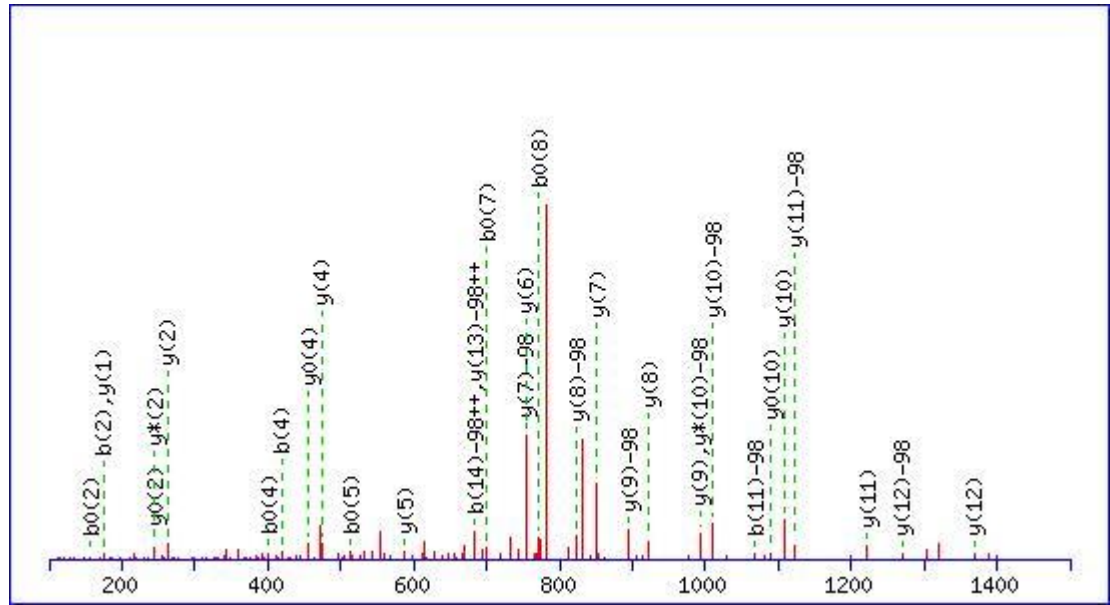

Monoisotopic mass of neutral peptide Mr(calc): 1638.7290

Variable modifications:

S10 : Phospho (ST), with neutral losses 0.0000(shown in table), 97.9769

Ions Score: 74 Expect: 9.5e-005

Matches : 32/212 fragment ions using 49 most intense peaks ([help](#))

| #  | b         | b <sup>++</sup> | b <sup>0</sup> | b <sup>0++</sup> | Seq. | y         | y <sup>++</sup> | y <sup>*</sup> | y <sup>***</sup> | y <sup>0</sup> | y <sup>0++</sup> | #  |
|----|-----------|-----------------|----------------|------------------|------|-----------|-----------------|----------------|------------------|----------------|------------------|----|
| 1  | 88.0393   | 44.5233         | 70.0287        | 35.5180          | S    |           |                 |                |                  |                |                  | 15 |
| 2  | 175.0713  | 88.0393         | 157.0608       | 79.0340          | S    | 1552.7043 | 776.8558        | 1535.6778      | 768.3425         | 1534.6937      | 767.8505         | 14 |
| 3  | 272.1241  | 136.5657        | 254.1135       | 127.5604         | P    | 1465.6723 | 733.3398        | 1448.6457      | 724.8265         | 1447.6617      | 724.3345         | 13 |
| 4  | 419.1925  | 210.0999        | 401.1819       | 201.0946         | F    | 1368.6195 | 684.8134        | 1351.5930      | 676.3001         | 1350.6090      | 675.8081         | 12 |
| 5  | 532.2766  | 266.6419        | 514.2660       | 257.6366         | L    | 1221.5511 | 611.2792        | 1204.5246      | 602.7659         | 1203.5405      | 602.2739         | 11 |
| 6  | 647.3035  | 324.1554        | 629.2930       | 315.1501         | D    | 1108.4670 | 554.7372        | 1091.4405      | 546.2239         | 1090.4565      | 545.7319         | 10 |
| 7  | 718.3406  | 359.6740        | 700.3301       | 350.6687         | A    | 993.4401  | 497.2237        | 976.4136       | 488.7104         | 975.4295       | 488.2184         | 9  |
| 8  | 789.3777  | 395.1925        | 771.3672       | 386.1872         | A    | 922.4030  | 461.7051        | 905.3764       | 453.1919         | 904.3924       | 452.6998         | 8  |
| 9  | 886.4305  | 443.7189        | 868.4199       | 434.7136         | P    | 851.3659  | 426.1866        | 834.3393       | 417.6733         | 833.3553       | 417.1813         | 7  |
| 10 | 1053.4289 | 527.2181        | 1035.4183      | 518.2128         | S    | 754.3131  | 377.6602        | 737.2866       | 369.1469         | 736.3025       | 368.6549         | 6  |
| 11 | 1166.5129 | 583.7601        | 1148.5024      | 574.7548         | L    | 587.3148  | 294.1610        | 570.2882       | 285.6477         | 569.3042       | 285.1557         | 5  |
| 12 | 1263.5657 | 632.2865        | 1245.5551      | 623.2812         | P    | 474.2307  | 237.6190        | 457.2041       | 229.1057         | 456.2201       | 228.6137         | 4  |
| 13 | 1378.5926 | 689.8000        | 1360.5821      | 680.7947         | D    | 377.1779  | 189.0926        | 360.1514       | 180.5793         | 359.1674       | 180.0873         | 3  |
| 14 | 1465.6247 | 733.3160        | 1447.6141      | 724.3107         | S    | 262.1510  | 131.5791        | 245.1244       | 123.0659         | 244.1404       | 122.5738         | 2  |
| 15 |           |                 |                |                  | R    | 175.1190  | 88.0631         | 158.0924       | 79.5498          |                |                  | 1  |

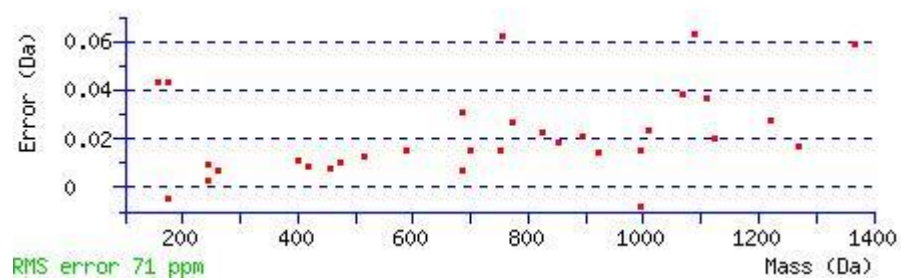

# 18\_MS/MS Fragmentation of **SSPFLDAAPSLPDSR**

Found in **O95180**, Voltage-dependent T-type calcium channel subunit alpha-1H OS=Homo sapiens GN=CACNA1H PE=1 SV=4

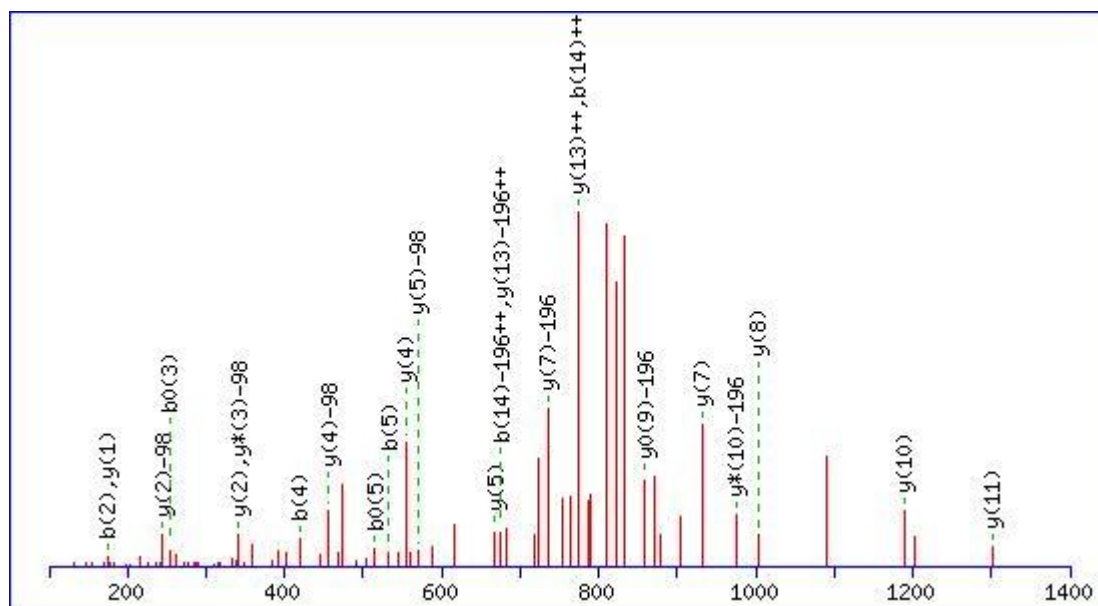

Monoisotopic mass of neutral peptide Mr(calc): 1718.6954

Variable modifications:

S10 : Phospho (ST), with neutral losses 0.0000(shown in table), 97.9769

S14 : Phospho (ST), with neutral losses 0.0000(shown in table), 97.9769

Ions Score: 36 Expect: 0.54

Matches : 24/236 fragment ions using 38 most intense peaks ([help](#))

| #  | b               | b <sup>++</sup> | b <sup>0</sup>  | b <sup>0++</sup> | Seq. | y                | y <sup>++</sup> | y <sup>*</sup> | y <sup>*++</sup> | y <sup>0</sup> | y <sup>0++</sup> | #  |
|----|-----------------|-----------------|-----------------|------------------|------|------------------|-----------------|----------------|------------------|----------------|------------------|----|
| 1  | 88.0393         | 44.5233         | 70.0287         | 35.5180          | S    |                  |                 |                |                  |                |                  | 15 |
| 2  | <b>175.0713</b> | 88.0393         | 157.0608        | 79.0340          | S    | 1632.6706        | 816.8390        | 1615.6441      | 808.3257         | 1614.6601      | 807.8337         | 14 |
| 3  | 272.1241        | 136.5657        | <b>254.1135</b> | 127.5604         | P    | 1545.6386        | <b>773.3229</b> | 1528.6121      | 764.8097         | 1527.6281      | 764.3177         | 13 |
| 4  | <b>419.1925</b> | 210.0999        | 401.1819        | 201.0946         | F    | 1448.5859        | 724.7966        | 1431.5593      | 716.2833         | 1430.5753      | 715.7913         | 12 |
| 5  | <b>532.2766</b> | 266.6419        | <b>514.2660</b> | 257.6366         | L    | <b>1301.5174</b> | 651.2624        | 1284.4909      | 642.7491         | 1283.5069      | 642.2571         | 11 |
| 6  | 647.3035        | 324.1554        | 629.2930        | 315.1501         | D    | <b>1188.4334</b> | 594.7203        | 1171.4068      | 586.2071         | 1170.4228      | 585.7150         | 10 |
| 7  | 718.3406        | 359.6740        | 700.3301        | 350.6687         | A    | 1073.4064        | 537.2069        | 1056.3799      | 528.6936         | 1055.3959      | 528.2016         | 9  |
| 8  | 789.3777        | 395.1925        | 771.3672        | 386.1872         | A    | <b>1002.3693</b> | 501.6883        | 985.3428       | 493.1750         | 984.3588       | 492.6830         | 8  |
| 9  | 886.4305        | 443.7189        | 868.4199        | 434.7136         | P    | <b>931.3322</b>  | 466.1697        | 914.3057       | 457.6565         | 913.3216       | 457.1645         | 7  |
| 10 | 1053.4289       | 527.2181        | 1035.4183       | 518.2128         | S    | 834.2794         | 417.6434        | 817.2529       | 409.1301         | 816.2689       | 408.6381         | 6  |
| 11 | 1166.5129       | 583.7601        | 1148.5024       | 574.7548         | L    | <b>667.2811</b>  | 334.1442        | 650.2545       | 325.6309         | 649.2705       | 325.1389         | 5  |
| 12 | 1263.5657       | 632.2865        | 1245.5551       | 623.2812         | P    | <b>554.1970</b>  | 277.6021        | 537.1705       | 269.0889         | 536.1865       | 268.5969         | 4  |
| 13 | 1378.5926       | 689.8000        | 1360.5821       | 680.7947         | D    | 457.1443         | 229.0758        | 440.1177       | 220.5625         | 439.1337       | 220.0705         | 3  |
| 14 | 1545.5910       | <b>773.2991</b> | 1527.5804       | 764.2939         | S    | <b>342.1173</b>  | 171.5623        | 325.0908       | 163.0490         | 324.1067       | 162.5570         | 2  |
| 15 |                 |                 |                 |                  | R    | <b>175.1190</b>  | 88.0631         | 158.0924       | 79.5498          |                |                  | 1  |

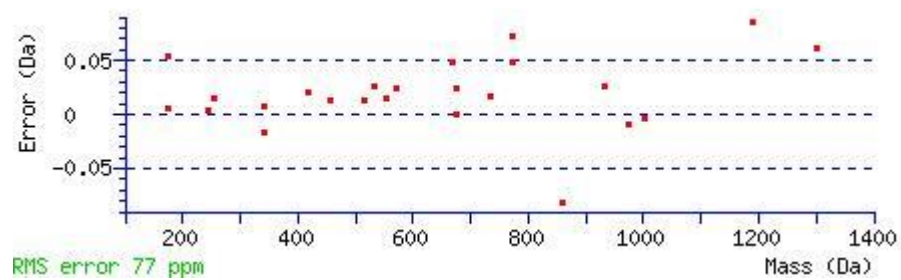

# 19\_MS/MS Fragmentation of **SSPFLDAAPSLPDSRR**

Found in **O95180**, Voltage-dependent T-type calcium channel subunit alpha-1H OS=Homo sapiens GN=CACNA1H PE=1 SV=4

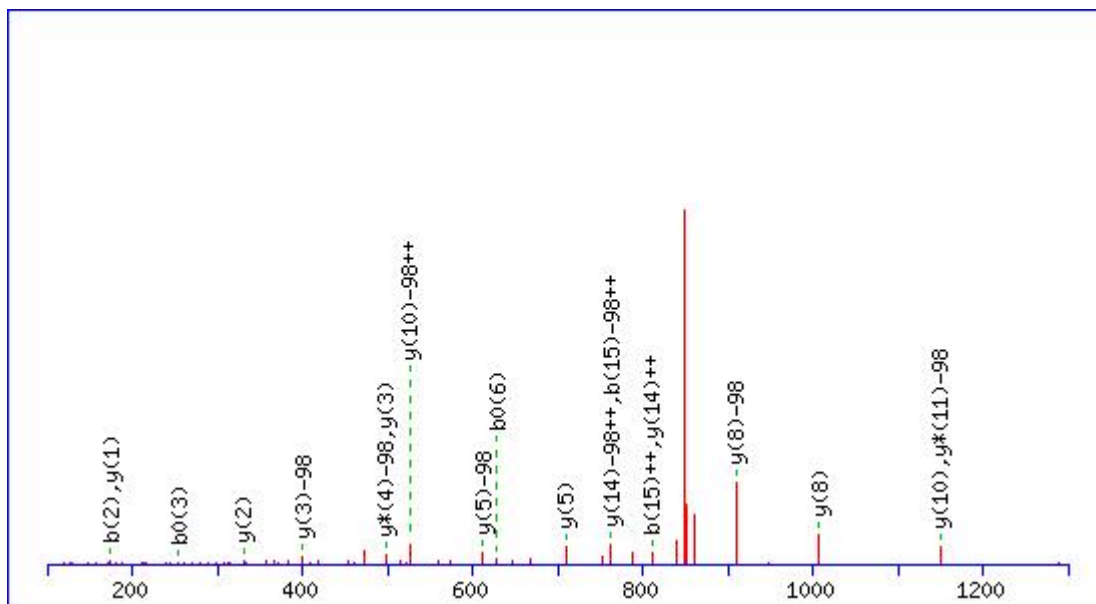

Monoisotopic mass of neutral peptide Mr(calc): 1794.8302

Variable modifications:

S14 : Phospho (ST), with neutral losses 0.0000(shown in table), 97.9769

Ions Score: 41 Expect: 0.2

Matches : 19/236 fragment ions using 20 most intense peaks ([help](#))

| # | b        | b <sup>++</sup> | b <sup>*</sup> | b <sup>*++</sup> | b <sup>0</sup> | b <sup>0++</sup> | Seq | y             | y <sup>++</sup> | y <sup>*</sup> | y <sup>*++</sup> | y <sup>0</sup> | y <sup>0++</sup> | #  |
|---|----------|-----------------|----------------|------------------|----------------|------------------|-----|---------------|-----------------|----------------|------------------|----------------|------------------|----|
| 1 | 88.0393  | 44.5233         |                |                  | 70.0287        | 35.5180          | S   |               |                 |                |                  |                |                  | 16 |
| 2 | 175.0713 | 88.0393         |                |                  | 157.0608       | 79.0340          | S   | 1708.805<br>4 | 854.906<br>4    | 1691.778<br>9  | 846.393<br>1     | 1690.794<br>9  | 845.901<br>1     | 15 |
| 3 | 272.1241 | 136.565<br>7    |                |                  | 254.1135       | 127.560<br>4     | P   | 1621.773<br>4 | 811.390<br>3    | 1604.746<br>8  | 802.877<br>1     | 1603.762<br>8  | 802.385<br>1     | 14 |
| 4 | 419.1925 | 210.099<br>9    |                |                  | 401.1819       | 201.094<br>6     | F   | 1524.720<br>6 | 762.864<br>0    | 1507.694<br>1  | 754.350<br>7     | 1506.710<br>1  | 753.858<br>7     | 13 |
| 5 | 532.2766 | 266.641<br>9    |                |                  | 514.2660       | 257.636<br>6     | L   | 1377.652<br>2 | 689.329<br>7    | 1360.625<br>7  | 680.816<br>5     | 1359.641<br>7  | 680.324<br>5     | 12 |
| 6 | 647.3035 | 324.155<br>4    |                |                  | 629.2930       | 315.150<br>1     | D   | 1264.568<br>2 | 632.787<br>7    | 1247.541<br>6  | 624.274<br>4     | 1246.557<br>6  | 623.782<br>4     | 11 |
| 7 | 718.3406 | 359.674<br>0    |                |                  | 700.3301       | 350.668<br>7     | A   | 1149.541<br>2 | 575.274<br>2    | 1132.514<br>7  | 566.761<br>0     | 1131.530<br>6  | 566.269<br>0     | 10 |
| 8 | 789.3777 | 395.192<br>5    |                |                  | 771.3672       | 386.187<br>2     | A   | 1078.504<br>1 | 539.755<br>7    | 1061.477<br>6  | 531.242<br>4     | 1060.493<br>5  | 530.750<br>4     | 9  |
| 9 | 886.4305 | 443.718<br>9    |                |                  | 868.4199       | 434.713<br>6     | P   | 1007.467<br>0 | 504.237<br>1    | 990.4404       | 495.723<br>9     | 989.4564       | 495.231<br>8     | 8  |

|    |           |          |           |          |           |          |   |          |          |          |          |          |          |   |
|----|-----------|----------|-----------|----------|-----------|----------|---|----------|----------|----------|----------|----------|----------|---|
| 10 | 973.4625  | 487.2349 |           |          | 955.4520  | 478.2296 | S | 910.4142 | 455.7107 | 893.3877 | 447.1975 | 892.4037 | 446.7055 | 7 |
| 11 | 1086.5466 | 543.7769 |           |          | 1068.5360 | 534.7717 | L | 823.3822 | 412.1947 | 806.3556 | 403.6815 | 805.3716 | 403.1895 | 6 |
| 12 | 1183.5994 | 592.3033 |           |          | 1165.5888 | 583.2980 | P | 710.2981 | 355.6527 | 693.2716 | 347.1394 | 692.2876 | 346.6474 | 5 |
| 13 | 1298.6263 | 649.8168 |           |          | 1280.6157 | 640.8115 | D | 613.2454 | 307.1263 | 596.2188 | 298.6130 | 595.2348 | 298.1210 | 4 |
| 14 | 1465.6247 | 733.3160 |           |          | 1447.6141 | 724.3107 | S | 498.2184 | 249.6128 | 481.1919 | 241.0996 | 480.2079 | 240.6076 | 3 |
| 15 | 1621.7258 | 811.3665 | 1604.6992 | 802.8533 | 1603.7152 | 802.3612 | R | 331.2201 | 166.1137 | 314.1935 | 157.6004 |          |          | 2 |
| 16 |           |          |           |          |           |          | R | 175.1190 | 88.0631  | 158.0924 | 79.5498  |          |          | 1 |

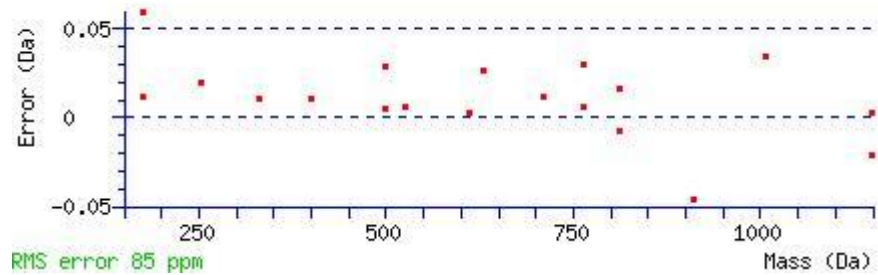

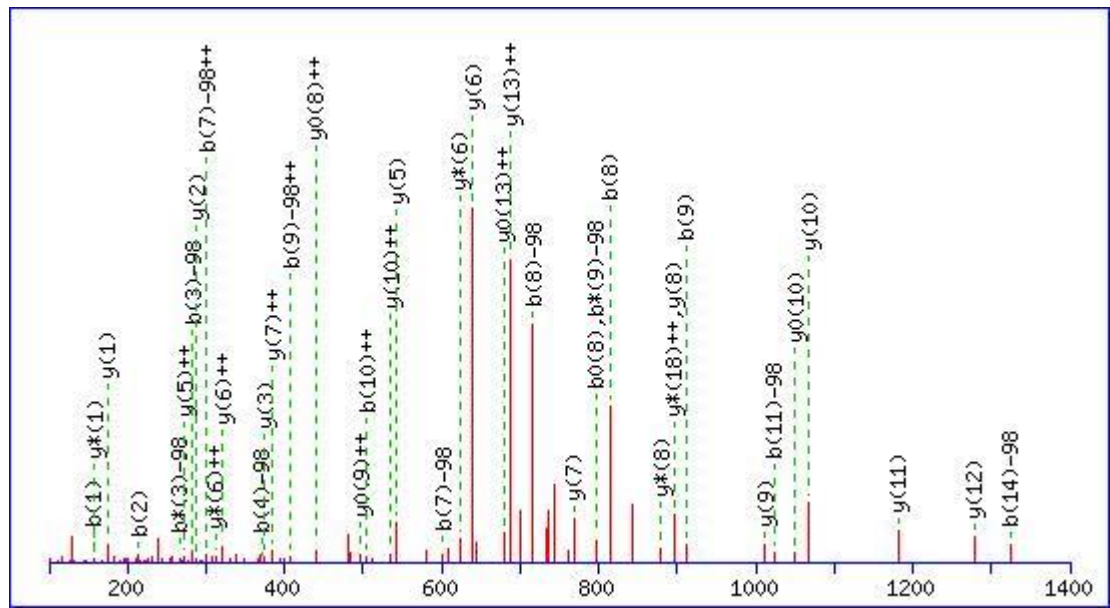

Monoisotopic mass of neutral peptide Mr(calc): 2188.0274

Variable modifications:

S3 : Phospho (ST), with neutral losses 97.9769(shown in table), 0.0000

Ions Score: 77 Expect: 6.6e-005

Matches : 41/352 fragment ions using 64 most intense peaks ([help](#))

| # | b        | b <sup>++</sup> | b <sup>*</sup> | b <sup>***</sup> | b <sup>0</sup> | b <sup>0++</sup> | Seq | y             | y <sup>++</sup> | y <sup>*</sup> | y <sup>***</sup> | y <sup>0</sup> | y <sup>0++</sup> | # |
|---|----------|-----------------|----------------|------------------|----------------|------------------|-----|---------------|-----------------|----------------|------------------|----------------|------------------|---|
| 1 | 157.1084 | 79.0578         | 140.0818       | 70.5446          |                |                  | R   |               |                 |                |                  |                |                  | 2 |
| 2 | 214.1299 | 107.568<br>6    | 197.1033       | 99.0553          |                |                  | G   | 1934.956<br>6 | 967.982<br>0    | 1917.930<br>1  | 959.468<br>7     | 1916.946<br>1  | 958.976<br>7     | 2 |
| 3 | 283.1513 | 142.079<br>3    | 266.1248       | 133.566<br>0     | 265.1407       | 133.074<br>0     | S   | 1877.935<br>2 | 939.471<br>2    | 1860.908<br>6  | 930.958<br>0     | 1859.924<br>6  | 930.465<br>9     | 1 |
| 4 | 370.1833 | 185.595<br>3    | 353.1568       | 177.082<br>0     | 352.1728       | 176.590<br>0     | S   | 1808.913<br>7 | 904.960<br>5    | 1791.887<br>2  | 896.447<br>2     | 1790.903<br>2  | 895.955<br>2     | 1 |
| 5 | 457.2154 | 229.111<br>3    | 440.1888       | 220.598<br>0     | 439.2048       | 220.106<br>0     | S   | 1721.881<br>7 | 861.444<br>5    | 1704.855<br>1  | 852.931<br>2     | 1703.871<br>1  | 852.439<br>2     | 1 |
| 6 | 544.2474 | 272.627<br>3    | 527.2208       | 264.114<br>1     | 526.2368       | 263.622<br>1     | S   | 1634.849<br>7 | 817.928<br>5    | 1617.823<br>1  | 809.415<br>2     | 1616.839<br>1  | 808.923<br>2     | 1 |
| 7 | 601.2689 | 301.138<br>1    | 584.2423       | 292.624<br>8     | 583.2583       | 292.132<br>8     | G   | 1547.817<br>6 | 774.412<br>5    | 1530.791<br>1  | 765.899<br>2     | 1529.807<br>1  | 765.407<br>2     | 1 |
| 8 | 716.2958 | 358.651<br>5    | 699.2693       | 350.138<br>3     | 698.2852       | 349.646<br>3     | D   | 1490.796<br>2 | 745.901<br>7    | 1473.769<br>6  | 737.388<br>4     | 1472.785<br>6  | 736.896<br>4     | 1 |
| 9 | 813.3486 | 407.177<br>9    | 796.3220       | 398.664<br>6     | 795.3380       | 398.172<br>6     | P   | 1375.769<br>2 | 688.388<br>3    | 1358.742<br>7  | 679.875<br>0     | 1357.758<br>7  | 679.383<br>0     | 1 |

|    |   |           |          |           |          |           |          |   |           |          |           |          |           |          |    |
|----|---|-----------|----------|-----------|----------|-----------|----------|---|-----------|----------|-----------|----------|-----------|----------|----|
| 10 | 1 | 910.4013  | 455.7043 | 893.3748  | 447.1910 | 892.3908  | 446.6990 | P | 1278.7165 | 639.8619 | 1261.6899 | 631.3486 | 1260.7059 | 630.8566 | 12 |
| 11 | 1 | 1023.4854 | 512.2463 | 1006.4588 | 503.7331 | 1005.4748 | 503.2411 | L | 1181.6637 | 591.3355 | 1164.6371 | 582.8222 | 1163.6531 | 582.3302 | 11 |
| 12 | 1 | 1080.5069 | 540.7571 | 1063.4803 | 532.2438 | 1062.4963 | 531.7518 | G | 1068.5796 | 534.7935 | 1051.5531 | 526.2802 | 1050.5691 | 525.7882 | 10 |
| 13 | 1 | 1195.5338 | 598.2705 | 1178.5073 | 589.7573 | 1177.5232 | 589.2653 | D | 1011.5582 | 506.2827 | 994.5316  | 497.7694 | 993.5476  | 497.2774 | 9  |
| 14 | 1 | 1323.5924 | 662.2998 | 1306.5658 | 653.7866 | 1305.5818 | 653.2945 | Q | 896.5312  | 448.7693 | 879.5047  | 440.2560 | 878.5207  | 439.7640 | 8  |
| 15 | 1 | 1451.6873 | 726.3473 | 1434.6608 | 717.8340 | 1433.6768 | 717.3420 | K | 768.4726  | 384.7400 | 751.4461  | 376.2267 | 750.4621  | 375.7347 | 7  |
| 16 | 1 | 1548.7401 | 774.8737 | 1531.7136 | 766.3604 | 1530.7295 | 765.8684 | P | 640.3777  | 320.6925 | 623.3511  | 312.1792 | 622.3671  | 311.6872 | 6  |
| 17 | 1 | 1645.7929 | 823.4001 | 1628.7663 | 814.8868 | 1627.7823 | 814.3948 | P | 543.3249  | 272.1661 | 526.2984  | 263.6528 | 525.3144  | 263.1608 | 5  |
| 18 | 1 | 1716.8300 | 858.9186 | 1699.8034 | 850.4054 | 1698.8194 | 849.9133 | A | 446.2722  | 223.6397 | 429.2456  | 215.1264 | 428.2616  | 214.6344 | 4  |
| 19 | 1 | 1803.8620 | 902.4346 | 1786.8355 | 893.9214 | 1785.8515 | 893.4294 | S | 375.2350  | 188.1212 | 358.2085  | 179.6079 | 357.2245  | 179.1159 | 3  |
| 20 | 2 | 1916.9461 | 958.9767 | 1899.9195 | 950.4634 | 1898.9355 | 949.9714 | L | 288.2030  | 144.6051 | 271.1765  | 136.0919 |           |          | 2  |
| 21 | 2 |           |          |           |          |           |          | R | 175.1190  | 88.0631  | 158.0924  | 79.5498  |           |          | 1  |

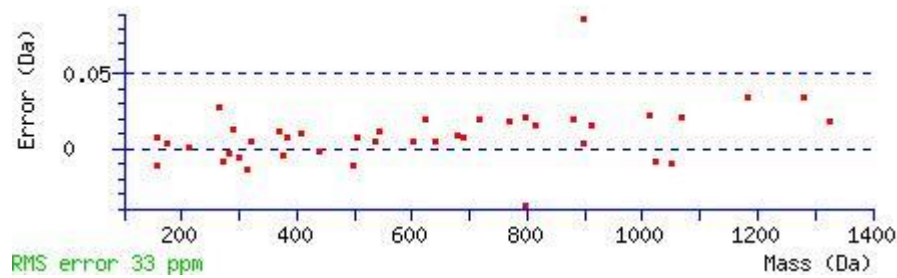

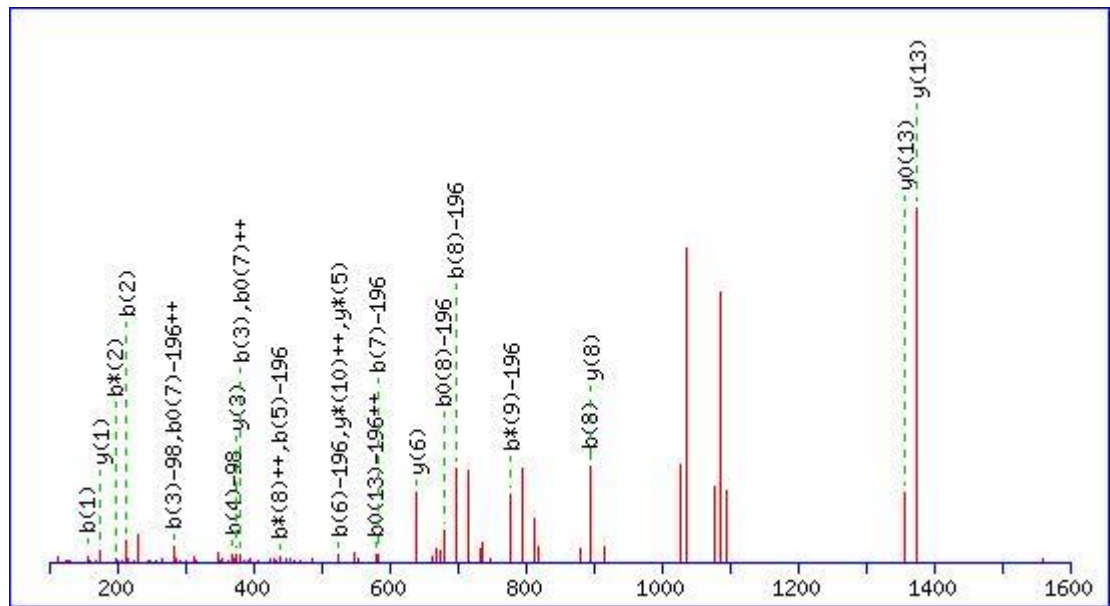

Monoisotopic mass of neutral peptide Mr(calc): 2267.9937

Variable modifications:

S3 : Phospho (ST), with neutral losses 97.9769(shown in table), 0.0000

S5 : Phospho (ST), with neutral losses 97.9769(shown in table), 0.0000

Ions Score: 43 Expect: 0.16

Matches : 25/364 fragment ions using 40 most intense peaks ([help](#))

| # | b        | b <sup>++</sup> | b <sup>*</sup> | b <sup>***</sup> | b <sup>0</sup> | b <sup>0++</sup> | Seq | y         | y <sup>++</sup> | y <sup>*</sup> | y <sup>***</sup> | y <sup>0</sup> | y <sup>0++</sup> | #  |
|---|----------|-----------------|----------------|------------------|----------------|------------------|-----|-----------|-----------------|----------------|------------------|----------------|------------------|----|
| 1 | 157.1084 | 79.0578         | 140.0818       | 70.5446          |                |                  | R   |           |                 |                |                  |                |                  | 2  |
| 2 | 214.1299 | 107.5686        | 197.1033       | 99.0553          |                |                  | G   | 1916.9461 | 958.9767        | 1899.9195      | 950.4634         | 1898.9355      | 949.9714         | 20 |
| 3 | 283.1513 | 142.0793        | 266.1248       | 133.5660         | 265.1407       | 133.0740         | S   | 1859.9246 | 930.4659        | 1842.8981      | 921.9527         | 1841.9140      | 921.4607         | 19 |
| 4 | 370.1833 | 185.5953        | 353.1568       | 177.0820         | 352.1728       | 176.5900         | S   | 1790.9032 | 895.9552        | 1773.8766      | 887.4419         | 1772.8926      | 886.9499         | 18 |
| 5 | 439.2048 | 220.1060        | 422.1783       | 211.5928         | 421.1942       | 211.1008         | S   | 1703.8711 | 852.4392        | 1686.8446      | 843.9259         | 1685.8606      | 843.4339         | 17 |
| 6 | 526.2368 | 263.6221        | 509.2103       | 255.1088         | 508.2263       | 254.6168         | S   | 1634.8497 | 817.9285        | 1617.8231      | 809.4152         | 1616.8391      | 808.9232         | 16 |
| 7 | 583.2583 | 292.1328        | 566.2317       | 283.6195         | 565.2477       | 283.1275         | G   | 1547.8176 | 774.4125        | 1530.7911      | 765.8992         | 1529.8071      | 765.4072         | 15 |
| 8 | 698.2852 | 349.6463        | 681.2587       | 341.1330         | 680.2747       | 340.6410         | D   | 1490.7962 | 745.9017        | 1473.7696      | 737.3884         | 1472.7856      | 736.8964         | 14 |
| 9 | 795.3380 | 398.1726        | 778.3115       | 389.6594         | 777.3274       | 389.1674         | P   | 1375.7692 | 688.3883        | 1358.7427      | 679.8750         | 1357.7587      | 679.3830         | 13 |

|    |           |          |           |          |           |          |   |           |          |           |          |           |          |    |
|----|-----------|----------|-----------|----------|-----------|----------|---|-----------|----------|-----------|----------|-----------|----------|----|
| 10 | 892.3908  | 446.6990 | 875.3642  | 438.1857 | 874.3802  | 437.6937 | P | 1278.7165 | 639.8619 | 1261.6899 | 631.3486 | 1260.7059 | 630.8566 | 12 |
| 11 | 1005.4748 | 503.2411 | 988.4483  | 494.7278 | 987.4643  | 494.2358 | L | 1181.6637 | 591.3355 | 1164.6371 | 582.8222 | 1163.6531 | 582.3302 | 11 |
| 12 | 1062.4963 | 531.7518 | 1045.4697 | 523.2385 | 1044.4857 | 522.7465 | G | 1068.5796 | 534.7935 | 1051.5531 | 526.2802 | 1050.5691 | 525.7882 | 10 |
| 13 | 1177.5232 | 589.2653 | 1160.4967 | 580.7520 | 1159.5127 | 580.2600 | D | 1011.5582 | 506.2827 | 994.5316  | 497.7694 | 993.5476  | 497.2774 | 9  |
| 14 | 1305.5818 | 653.2945 | 1288.5553 | 644.7813 | 1287.5713 | 644.2893 | Q | 896.5312  | 448.7693 | 879.5047  | 440.2560 | 878.5207  | 439.7640 | 8  |
| 15 | 1433.6768 | 717.3420 | 1416.6502 | 708.8288 | 1415.6662 | 708.3367 | K | 768.4726  | 384.7400 | 751.4461  | 376.2267 | 750.4621  | 375.7347 | 7  |
| 16 | 1530.7295 | 765.8684 | 1513.7030 | 757.3551 | 1512.7190 | 756.8631 | P | 640.3777  | 320.6925 | 623.3511  | 312.1792 | 622.3671  | 311.6872 | 6  |
| 17 | 1627.7823 | 814.3948 | 1610.7558 | 805.8815 | 1609.7717 | 805.3895 | P | 543.3249  | 272.1661 | 526.2984  | 263.6528 | 525.3144  | 263.1608 | 5  |
| 18 | 1698.8194 | 849.9133 | 1681.7929 | 841.4001 | 1680.8089 | 840.9081 | A | 446.2722  | 223.6397 | 429.2456  | 215.1264 | 428.2616  | 214.6344 | 4  |
| 19 | 1785.8514 | 893.4294 | 1768.8249 | 884.9161 | 1767.8409 | 884.4241 | S | 375.2350  | 188.1212 | 358.2085  | 179.6079 | 357.2245  | 179.1159 | 3  |
| 20 | 1898.9355 | 949.9714 | 1881.9090 | 941.4581 | 1880.9249 | 940.9661 | L | 288.2030  | 144.6051 | 271.1765  | 136.0919 |           |          | 2  |
| 21 |           |          |           |          |           |          | R | 175.1190  | 88.0631  | 158.0924  | 79.5498  |           |          | 1  |

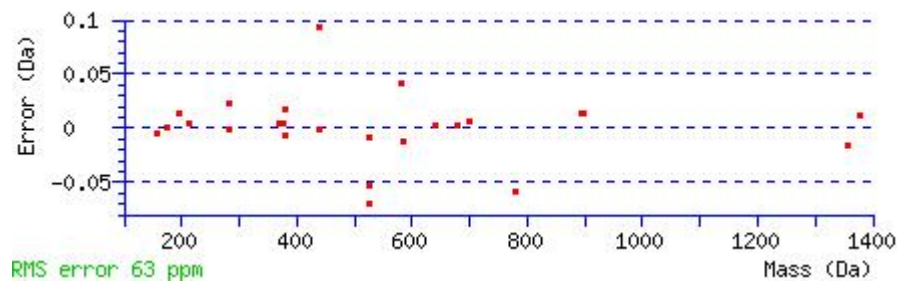

22\_MS/MS Fragmentation of **SSWSSLGR**

Found in **O95180**, Voltage-dependent T-type calcium channel subunit alpha-1H OS=Homo sapiens GN=CACNA1H PE=1 SV=4

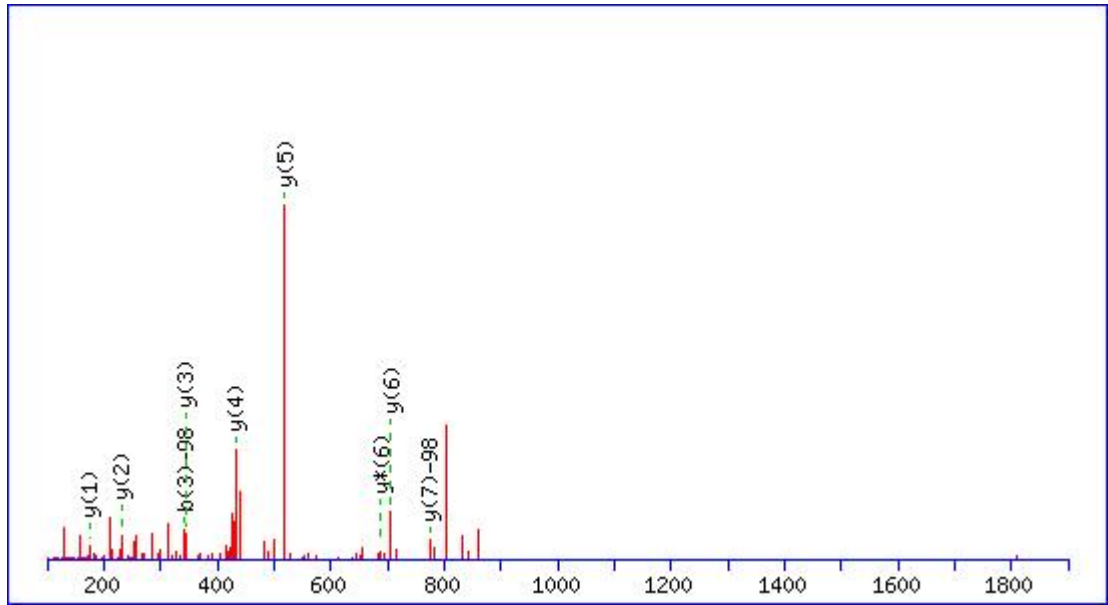

Monoisotopic mass of neutral peptide Mr(calc): 958.3909

Variable modifications:

S2 : Phospho (ST), with neutral losses 97.9769(shown in table), 0.0000

Ions Score: 43 Expect: 0.074

Matches : 9/94 fragment ions using 24 most intense peaks ([help](#))

| # | b        | b <sup>++</sup> | b <sup>0</sup> | b <sup>0++</sup> | Seq. | y        | y <sup>++</sup> | y <sup>*</sup> | y <sup>*++</sup> | y <sup>0</sup> | y <sup>0++</sup> | # |
|---|----------|-----------------|----------------|------------------|------|----------|-----------------|----------------|------------------|----------------|------------------|---|
| 1 | 88.0393  | 44.5233         | 70.0287        | 35.5180          | S    |          |                 |                |                  |                |                  | 8 |
| 2 | 157.0608 | 79.0340         | 139.0502       | 70.0287          | S    | 774.3893 | 387.6983        | 757.3628       | 379.1850         | 756.3787       | 378.6930         | 7 |
| 3 | 343.1401 | 172.0737        | 325.1295       | 163.0684         | W    | 705.3678 | 353.1876        | 688.3413       | 344.6743         | 687.3573       | 344.1823         | 6 |
| 4 | 430.1721 | 215.5897        | 412.1615       | 206.5844         | S    | 519.2885 | 260.1479        | 502.2620       | 251.6346         | 501.2780       | 251.1426         | 5 |
| 5 | 517.2041 | 259.1057        | 499.1936       | 250.1004         | S    | 432.2565 | 216.6319        | 415.2300       | 208.1186         | 414.2459       | 207.6266         | 4 |
| 6 | 630.2882 | 315.6477        | 612.2776       | 306.6425         | L    | 345.2245 | 173.1159        | 328.1979       | 164.6026         |                |                  | 3 |
| 7 | 687.3097 | 344.1585        | 669.2991       | 335.1532         | G    | 232.1404 | 116.5738        | 215.1139       | 108.0606         |                |                  | 2 |
| 8 |          |                 |                |                  | R    | 175.1190 | 88.0631         | 158.0924       | 79.5498          |                |                  | 1 |

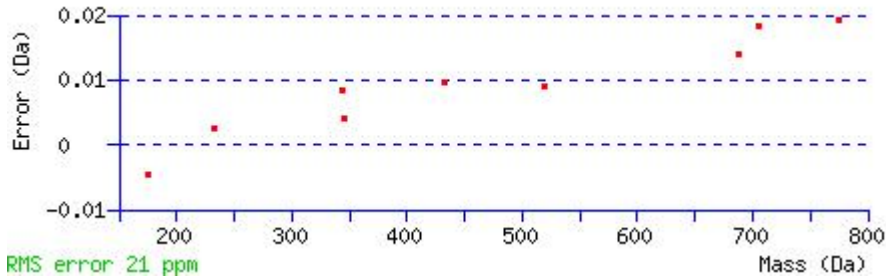

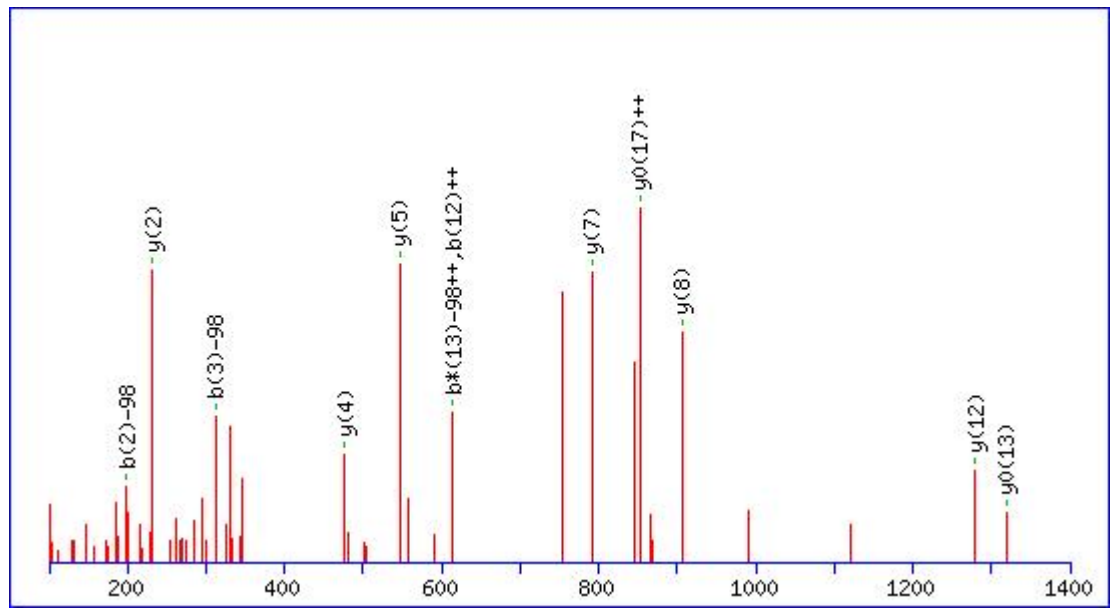

Monoisotopic mass of neutral peptide Mr(calc): 2130.8590

Variable modifications:

S2 : Phospho (ST), with neutral losses 97.9769(shown in table), 0.0000

Ions Score: 49 Expect: 0.027

Matches : 12/308 fragment ions using 12 most intense peaks ([help](#))

| # | b        | b <sup>++</sup> | b <sup>*</sup> | b <sup>*++</sup> | b <sup>0</sup> | b <sup>0++</sup> | Seq | y         | y <sup>++</sup> | y <sup>*</sup> | y <sup>*++</sup> | y <sup>0</sup> | y <sup>0++</sup> | #  |
|---|----------|-----------------|----------------|------------------|----------------|------------------|-----|-----------|-----------------|----------------|------------------|----------------|------------------|----|
| 1 | 130.0499 | 65.5286         |                |                  | 112.0393       | 56.5233          | E   |           |                 |                |                  |                |                  | 20 |
| 2 | 199.0713 | 100.0393        |                |                  | 181.0608       | 91.0340          | S   | 1904.8468 | 952.9270        | 1887.8203      | 944.4138         | 1886.8363      | 943.9218         | 19 |
| 3 | 312.1554 | 156.5813        |                |                  | 294.1448       | 147.5761         | L   | 1835.8254 | 918.4163        | 1818.7988      | 909.9030         | 1817.8148      | 909.4110         | 18 |
| 4 | 425.2395 | 213.1234        |                |                  | 407.2289       | 204.1181         | L   | 1722.7413 | 861.8743        | 1705.7147      | 853.3610         | 1704.7307      | 852.8690         | 17 |
| 5 | 512.2715 | 256.6394        |                |                  | 494.2609       | 247.6341         | S   | 1609.6572 | 805.3323        | 1592.6307      | 796.8190         | 1591.6467      | 796.3270         | 16 |
| 6 | 569.2930 | 285.1501        |                |                  | 551.2824       | 276.1448         | G   | 1522.6252 | 761.8162        | 1505.5987      | 753.3030         | 1504.6146      | 752.8110         | 15 |
| 7 | 698.3355 | 349.6714        |                |                  | 680.3250       | 340.6661         | E   | 1465.6037 | 733.3055        | 1448.5772      | 724.7922         | 1447.5932      | 724.3002         | 14 |
| 8 | 755.3570 | 378.1821        |                |                  | 737.3464       | 369.1769         | G   | 1336.5611 | 668.7842        | 1319.5346      | 660.2709         | 1318.5506      | 659.7789         | 13 |
| 9 | 883.4520 | 442.2296        | 866.4254       | 433.7163         | 865.4414       | 433.2243         | K   | 1279.5397 | 640.2735        | 1262.5131      | 631.7602         | 1261.5291      | 631.2682         | 12 |

|    |           |          |           |          |           |          |   |           |          |           |          |           |          |    |
|----|-----------|----------|-----------|----------|-----------|----------|---|-----------|----------|-----------|----------|-----------|----------|----|
| 10 | 940.4734  | 470.7404 | 923.4469  | 462.2271 | 922.4629  | 461.7351 | G | 1151.4447 | 576.2260 | 1134.4182 | 567.7127 | 1133.4342 | 567.2207 | 11 |
| 11 | 1027.5055 | 514.2564 | 1010.4789 | 505.7431 | 1009.4949 | 505.2511 | S | 1094.4233 | 547.7153 | 1077.3967 | 539.2020 | 1076.4127 | 538.7100 | 10 |
| 12 | 1128.5531 | 564.7802 | 1111.5266 | 556.2669 | 1110.5426 | 555.7749 | T | 1007.3912 | 504.1993 | 990.3647  | 495.6860 | 989.3807  | 495.1940 | 9  |
| 13 | 1243.5801 | 622.2937 | 1226.5535 | 613.7804 | 1225.5695 | 613.2884 | D | 906.3435  | 453.6754 | 889.3170  | 445.1621 | 888.3330  | 444.6701 | 8  |
| 14 | 1358.6070 | 679.8072 | 1341.5805 | 671.2939 | 1340.5965 | 670.8019 | D | 791.3166  | 396.1619 | 774.2901  | 387.6487 | 773.3060  | 387.1567 | 7  |
| 15 | 1487.6496 | 744.3284 | 1470.6231 | 735.8152 | 1469.6391 | 735.3232 | E | 676.2897  | 338.6485 | 659.2631  | 330.1352 | 658.2791  | 329.6432 | 6  |
| 16 | 1558.6867 | 779.8470 | 1541.6602 | 771.3337 | 1540.6762 | 770.8417 | A | 547.2471  | 274.1272 | 530.2205  | 265.6139 | 529.2365  | 265.1219 | 5  |
| 17 | 1687.7293 | 844.3683 | 1670.7028 | 835.8550 | 1669.7188 | 835.3630 | E | 476.2100  | 238.6086 | 459.1834  | 230.0953 | 458.1994  | 229.6033 | 4  |
| 18 | 1802.7563 | 901.8818 | 1785.7297 | 893.3685 | 1784.7457 | 892.8765 | D | 347.1674  | 174.0873 | 330.1408  | 165.5740 | 329.1568  | 165.0820 | 3  |
| 19 | 1859.7777 | 930.3925 | 1842.7512 | 921.8792 | 1841.7672 | 921.3872 | G | 232.1404  | 116.5738 | 215.1139  | 108.0606 |           |          | 2  |
| 20 |           |          |           |          |           |          | R | 175.1190  | 88.0631  | 158.0924  | 79.5498  |           |          | 1  |

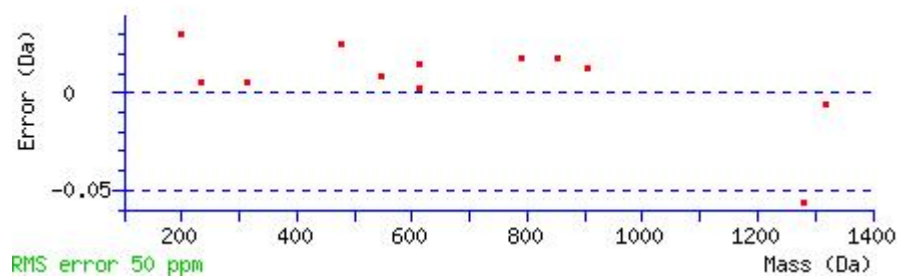

24\_MS/MS Fragmentation of **ESLLSGEGK**

Found in **O95180**, Voltage-dependent T-type calcium channel subunit alpha-1H OS=Homo sapiens GN=CACNA1H PE=1 SV=4

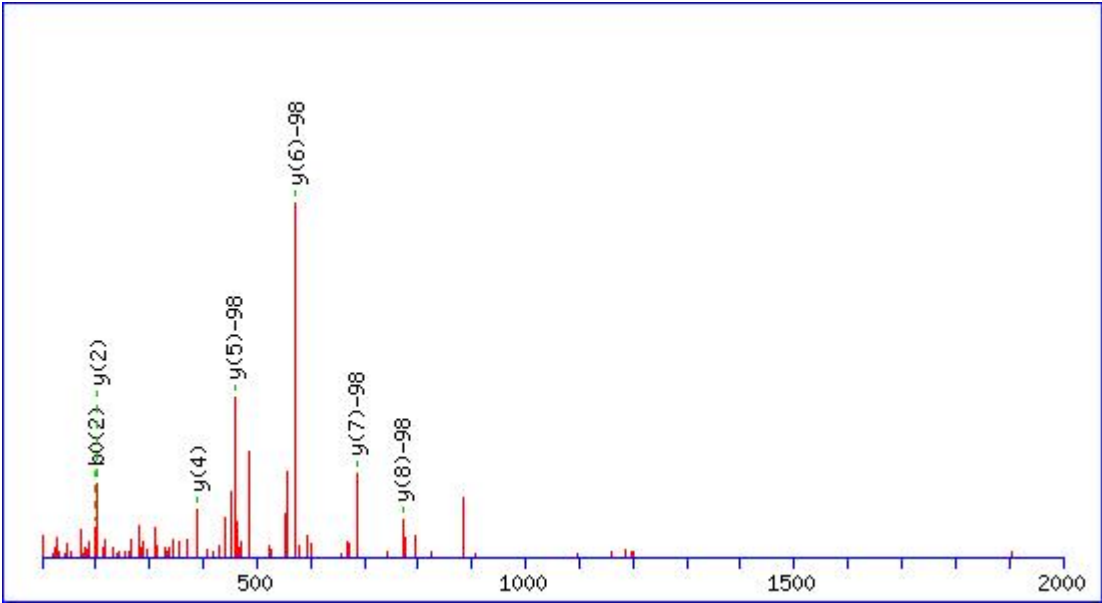

Monoisotopic mass of neutral peptide  $M_r(\text{calc})$ : 998.4321

Variable modifications:

S5 : Phospho (ST), with neutral losses 97.9769(shown in table), 0.0000

Ions Score: 55 Expect: 0.0051

Matches : 7/116 fragment ions using 9 most intense peaks ([help](#))

| # | b        | b <sup>++</sup> | b <sup>0</sup> | b <sup>0++</sup> | Seq. | y        | y <sup>++</sup> | y <sup>*</sup> | y <sup>*++</sup> | y <sup>0</sup> | y <sup>0++</sup> | # |
|---|----------|-----------------|----------------|------------------|------|----------|-----------------|----------------|------------------|----------------|------------------|---|
| 1 | 130.0499 | 65.5286         | 112.0393       | 56.5233          | E    |          |                 |                |                  |                |                  | 9 |
| 2 | 217.0819 | 109.0446        | 199.0713       | 100.0393         | S    | 772.4199 | 386.7136        | 755.3934       | 378.2003         | 754.4094       | 377.7083         | 8 |
| 3 | 330.1660 | 165.5866        | 312.1554       | 156.5813         | L    | 685.3879 | 343.1976        | 668.3614       | 334.6843         | 667.3774       | 334.1923         | 7 |
| 4 | 443.2500 | 222.1287        | 425.2395       | 213.1234         | L    | 572.3039 | 286.6556        | 555.2773       | 278.1423         | 554.2933       | 277.6503         | 6 |
| 5 | 512.2715 | 256.6394        | 494.2609       | 247.6341         | S    | 459.2198 | 230.1135        | 442.1932       | 221.6003         | 441.2092       | 221.1082         | 5 |
| 6 | 569.2930 | 285.1501        | 551.2824       | 276.1448         | G    | 390.1983 | 195.6028        | 373.1718       | 187.0895         | 372.1878       | 186.5975         | 4 |
| 7 | 698.3355 | 349.6714        | 680.3250       | 340.6661         | E    | 333.1769 | 167.0921        | 316.1503       | 158.5788         | 315.1663       | 158.0868         | 3 |
| 8 | 755.3570 | 378.1821        | 737.3464       | 369.1769         | G    | 204.1343 | 102.5708        | 187.1077       | 94.0575          |                |                  | 2 |
| 9 |          |                 |                |                  | K    | 147.1128 | 74.0600         | 130.0863       | 65.5468          |                |                  | 1 |

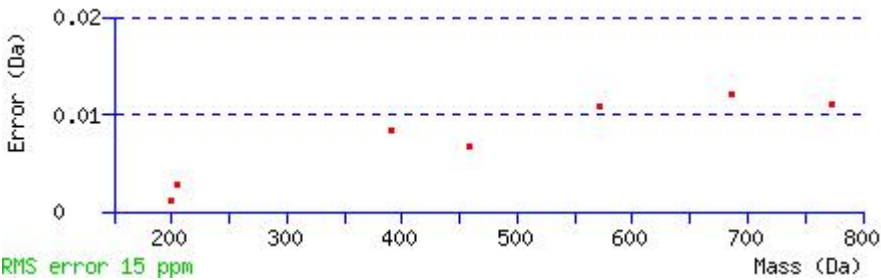

25\_MS/MS Fragmentation of **ESLLSGEGKGSTDDEAEDGR**

Found in **O95180**, Voltage-dependent T-type calcium channel subunit alpha-1H OS=Homo sapiens GN=CACNA1H PE=1 SV=4

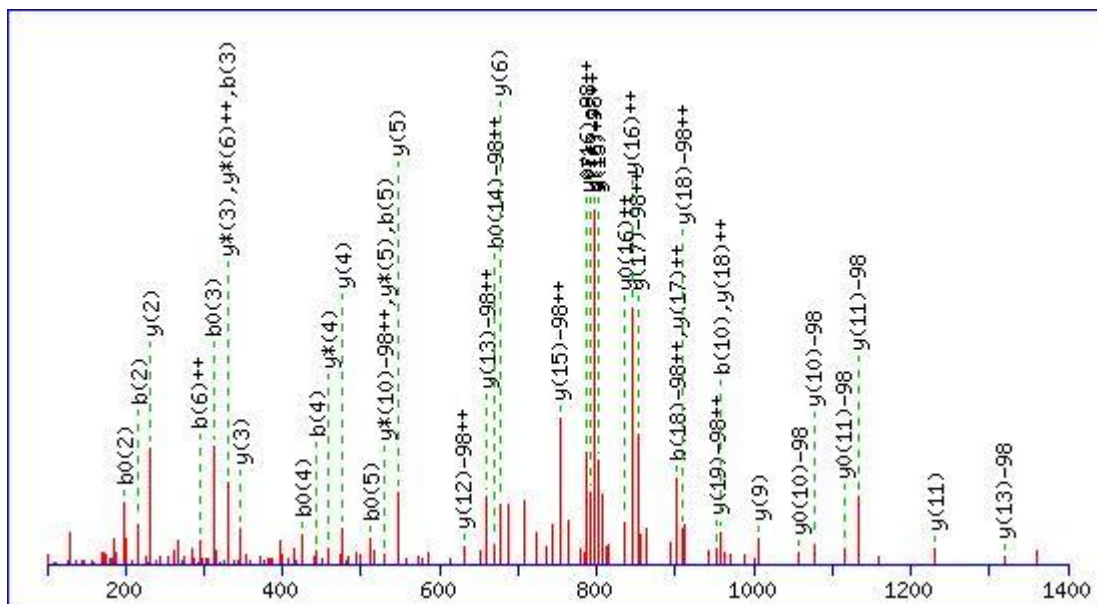

Monoisotopic mass of neutral peptide Mr(calc): 2130.8590

Variable modifications:

**S11** : Phospho (ST), with neutral losses 97.9769 (shown in table), 0.0000

Ions Score: 75 Expect: 6.8e-005

**Matches** : 43/322 fragment ions using 54 most intense peaks ([help](#))

| # | <b>b</b> | <b>b<sup>++</sup></b> | <b>b*</b> | <b>b<sup>***</sup></b> | <b>b<sup>0</sup></b> | <b>b<sup>0++</sup></b> | Seq<br>. | <b>y</b>  | <b>y<sup>++</sup></b> | <b>y*</b> | <b>y<sup>***</sup></b> | <b>y<sup>0</sup></b> | <b>y<sup>0++</sup></b> | #  |
|---|----------|-----------------------|-----------|------------------------|----------------------|------------------------|----------|-----------|-----------------------|-----------|------------------------|----------------------|------------------------|----|
| 1 | 130.0499 | 65.5286               |           |                        | 112.0393             | 56.5233                | E        |           |                       |           |                        |                      |                        | 20 |
| 2 | 217.0819 | 109.0446              |           |                        | 199.0713             | 100.0393               | S        | 1904.8468 | 952.9270              | 1887.8203 | 944.4138               | 1886.8363            | 943.9218               | 19 |
| 3 | 330.1660 | 165.5866              |           |                        | 312.1554             | 156.5813               | L        | 1817.8148 | 909.4110              | 1800.7882 | 900.8978               | 1799.8042            | 900.4058               | 18 |
| 4 | 443.2500 | 222.1287              |           |                        | 425.2395             | 213.1234               | L        | 1704.7307 | 852.8690              | 1687.7042 | 844.3557               | 1686.7202            | 843.8637               | 17 |
| 5 | 530.2821 | 265.6447              |           |                        | 512.2715             | 256.6394               | S        | 1591.6467 | 796.3270              | 1574.6201 | 787.8137               | 1573.6361            | 787.3217               | 16 |
| 6 | 587.3035 | 294.1554              |           |                        | 569.2930             | 285.1501               | G        | 1504.6146 | 752.8110              | 1487.5881 | 744.2977               | 1486.6041            | 743.8057               | 15 |
| 7 | 716.3461 | 358.6767              |           |                        | 698.3355             | 349.6714               | E        | 1447.5932 | 724.3002              | 1430.5666 | 715.7869               | 1429.5826            | 715.2949               | 14 |
| 8 | 773.3676 | 387.1874              |           |                        | 755.3570             | 378.1821               | G        | 1318.5506 | 659.7789              | 1301.5240 | 651.2657               | 1300.5400            | 650.7736               | 13 |
| 9 | 901.4625 | 451.2349              | 884.4360  | 442.7216               | 883.4520             | 442.2296               | K        | 1261.5291 | 631.2682              | 1244.5026 | 622.7549               | 1243.5185            | 622.2629               | 12 |

|           |                 |                            |               |              |               |                            |          |                             |              |                 |                            |                             |              |           |
|-----------|-----------------|----------------------------|---------------|--------------|---------------|----------------------------|----------|-----------------------------|--------------|-----------------|----------------------------|-----------------------------|--------------|-----------|
| <b>10</b> | <b>958.4840</b> | 479.745<br>6               | 941.4575      | 471.232<br>4 | 940.4734      | 470.740<br>4               | <b>G</b> | <b>1133.434</b><br><b>2</b> | 567.220<br>7 | 1116.407<br>6   | 558.707<br>4               | <b>1115.423</b><br><b>6</b> | 558.215<br>4 | <b>11</b> |
| <b>11</b> | 1027.505<br>5   | 514.256<br>4               | 1010.478<br>9 | 505.743<br>1 | 1009.494<br>9 | 505.251<br>1               | <b>S</b> | <b>1076.412</b><br><b>7</b> | 538.710<br>0 | 1059.386<br>1   | <b>530.196</b><br><b>7</b> | <b>1058.402</b><br><b>1</b> | 529.704<br>7 | <b>10</b> |
| <b>12</b> | 1128.553<br>1   | 564.780<br>2               | 1111.526<br>6 | 556.266<br>9 | 1110.542<br>6 | 555.774<br>9               | <b>T</b> | <b>1007.391</b><br><b>2</b> | 504.199<br>3 | 990.3647        | 495.686<br>0               | 989.3807                    | 495.194<br>0 | <b>9</b>  |
| <b>13</b> | 1243.580<br>1   | 622.293<br>7               | 1226.553<br>5 | 613.780<br>4 | 1225.569<br>5 | 613.288<br>4               | <b>D</b> | 906.3435                    | 453.675<br>4 | 889.3170        | 445.162<br>1               | 888.3330                    | 444.670<br>1 | <b>8</b>  |
| <b>14</b> | 1358.607<br>0   | 679.807<br>2               | 1341.580<br>5 | 671.293<br>9 | 1340.596<br>5 | <b>670.801</b><br><b>9</b> | <b>D</b> | <b>791.3166</b>             | 396.161<br>9 | 774.2901        | 387.648<br>7               | 773.3060                    | 387.156<br>7 | <b>7</b>  |
| <b>15</b> | 1487.649<br>6   | 744.328<br>4               | 1470.623<br>1 | 735.815<br>2 | 1469.639<br>1 | 735.323<br>2               | <b>E</b> | <b>676.2897</b>             | 338.648<br>5 | 659.2631        | <b>330.135</b><br><b>2</b> | 658.2791                    | 329.643<br>2 | <b>6</b>  |
| <b>16</b> | 1558.686<br>7   | 779.847<br>0               | 1541.660<br>2 | 771.333<br>7 | 1540.676<br>2 | 770.841<br>7               | <b>A</b> | <b>547.2471</b>             | 274.127<br>2 | <b>530.2205</b> | 265.613<br>9               | 529.2365                    | 265.121<br>9 | <b>5</b>  |
| <b>17</b> | 1687.729<br>3   | 844.368<br>3               | 1670.702<br>8 | 835.855<br>0 | 1669.718<br>8 | 835.363<br>0               | <b>E</b> | <b>476.2100</b>             | 238.608<br>6 | <b>459.1834</b> | 230.095<br>3               | 458.1994                    | 229.603<br>3 | <b>4</b>  |
| <b>18</b> | 1802.756<br>3   | <b>901.881</b><br><b>8</b> | 1785.729<br>7 | 893.368<br>5 | 1784.745<br>7 | 892.876<br>5               | <b>D</b> | <b>347.1674</b>             | 174.087<br>3 | <b>330.1408</b> | 165.574<br>0               | 329.1568                    | 165.082<br>0 | <b>3</b>  |
| <b>19</b> | 1859.777<br>7   | 930.392<br>5               | 1842.751<br>2 | 921.879<br>2 | 1841.767<br>2 | 921.387<br>2               | <b>G</b> | <b>232.1404</b>             | 116.573<br>8 | 215.1139        | 108.060<br>6               |                             |              | <b>2</b>  |
| <b>20</b> |                 |                            |               |              |               |                            | <b>R</b> | 175.1190                    | 88.0631      | 158.0924        | 79.5498                    |                             |              | <b>1</b>  |

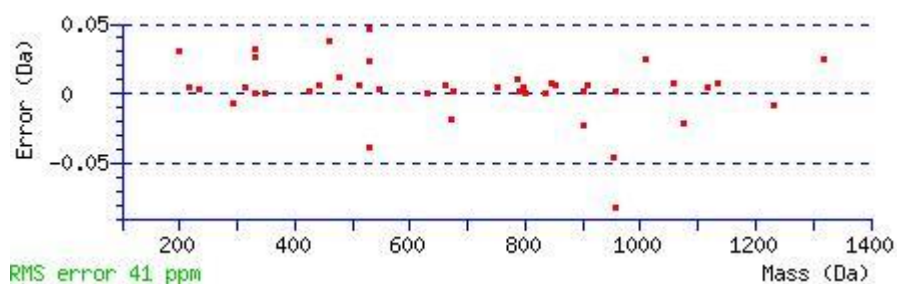

26\_MS/MS Fragmentation of **GSTDDEAEDGR**

Found in **O95180**, Voltage-dependent T-type calcium channel subunit alpha-1H OS=Homo sapiens GN=CACNA1H PE=1 SV=4

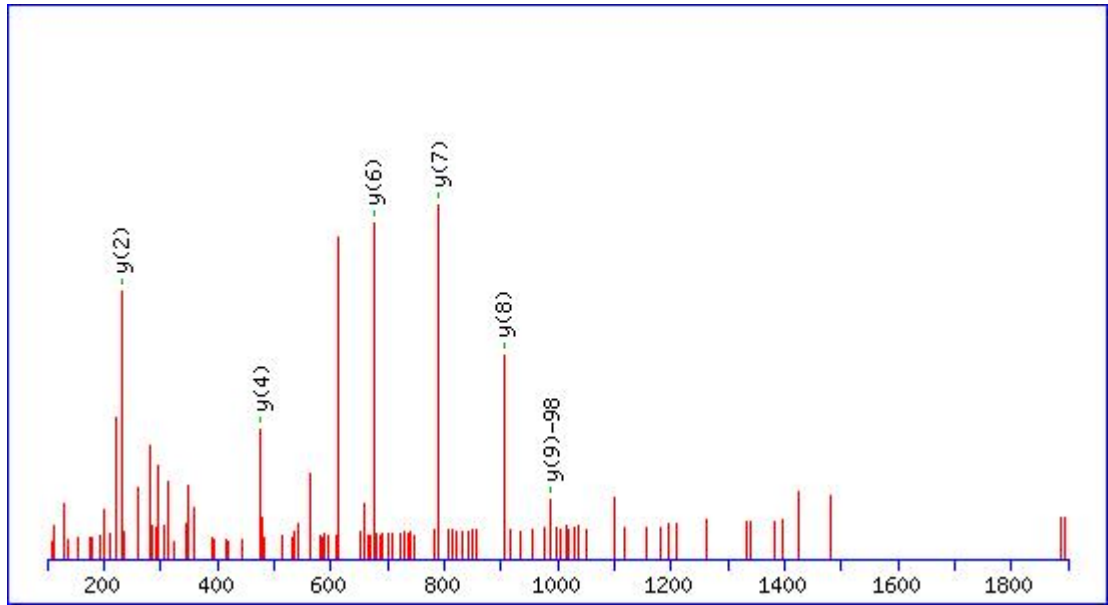

Monoisotopic mass of neutral peptide  $M_r(\text{calc})$ : 1230.4038

Variable modifications:

T3 : Phospho (ST), with neutral losses 97.9769(shown in table), 0.0000

Ions Score: 36 Expect: 0.17

Matches : 6/138 fragment ions using 12 most intense peaks ([help](#))

| #  | b        | b <sup>++</sup> | b <sup>0</sup> | b <sup>0++</sup> | Seq. | y         | y <sup>++</sup> | y <sup>*</sup> | y <sup>*++</sup> | y <sup>0</sup> | y <sup>0++</sup> | #  |
|----|----------|-----------------|----------------|------------------|------|-----------|-----------------|----------------|------------------|----------------|------------------|----|
| 1  | 58.0287  | 29.5180         |                |                  | G    |           |                 |                |                  |                |                  | 11 |
| 2  | 145.0608 | 73.0340         | 127.0502       | 64.0287          | S    | 1076.4127 | 538.7100        | 1059.3861      | 530.1967         | 1058.4021      | 529.7047         | 10 |
| 3  | 228.0979 | 114.5526        | 210.0873       | 105.5473         | T    | 989.3807  | 495.1940        | 972.3541       | 486.6807         | 971.3701       | 486.1887         | 9  |
| 4  | 343.1248 | 172.0661        | 325.1143       | 163.0608         | D    | 906.3435  | 453.6754        | 889.3170       | 445.1621         | 888.3330       | 444.6701         | 8  |
| 5  | 458.1518 | 229.5795        | 440.1412       | 220.5742         | D    | 791.3166  | 396.1619        | 774.2901       | 387.6487         | 773.3060       | 387.1567         | 7  |
| 6  | 587.1944 | 294.1008        | 569.1838       | 285.0955         | E    | 676.2897  | 338.6485        | 659.2631       | 330.1352         | 658.2791       | 329.6432         | 6  |
| 7  | 658.2315 | 329.6194        | 640.2209       | 320.6141         | A    | 547.2471  | 274.1272        | 530.2205       | 265.6139         | 529.2365       | 265.1219         | 5  |
| 8  | 787.2741 | 394.1407        | 769.2635       | 385.1354         | E    | 476.2100  | 238.6086        | 459.1834       | 230.0953         | 458.1994       | 229.6033         | 4  |
| 9  | 902.3010 | 451.6541        | 884.2904       | 442.6489         | D    | 347.1674  | 174.0873        | 330.1408       | 165.5740         | 329.1568       | 165.0820         | 3  |
| 10 | 959.3225 | 480.1649        | 941.3119       | 471.1596         | G    | 232.1404  | 116.5738        | 215.1139       | 108.0606         |                |                  | 2  |
| 11 |          |                 |                |                  | R    | 175.1190  | 88.0631         | 158.0924       | 79.5498          |                |                  | 1  |

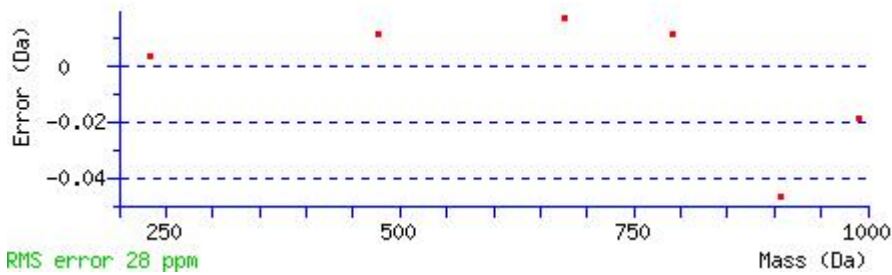

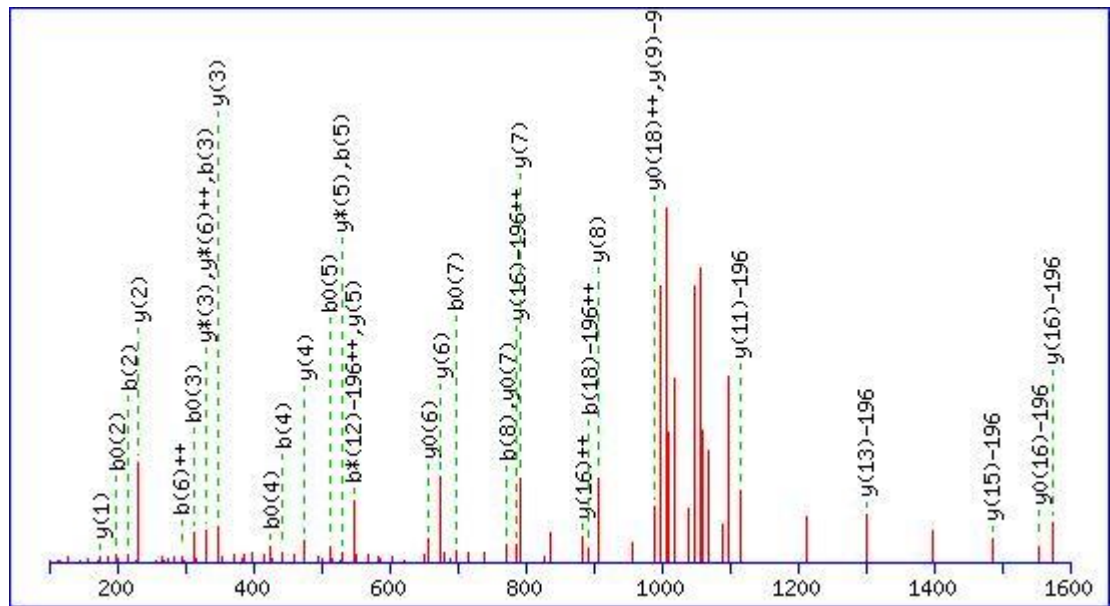

Monoisotopic mass of neutral peptide Mr(calc): 2210.8253

Variable modifications:

S11 : Phospho (ST), with neutral losses 97.9769(shown in table), 0.0000

T12 : Phospho (ST), with neutral losses 97.9769(shown in table), 0.0000

Ions Score: 113 Expect: 9e-009

Matches : 35/328 fragment ions using 37 most intense peaks ([help](#))

| # | b        | b <sup>++</sup> | b <sup>*</sup> | b <sup>***</sup> | b <sup>0</sup> | b <sup>0++</sup> | Seq | y         | y <sup>++</sup> | y <sup>*</sup> | y <sup>***</sup> | y <sup>0</sup> | y <sup>0++</sup> | #  |
|---|----------|-----------------|----------------|------------------|----------------|------------------|-----|-----------|-----------------|----------------|------------------|----------------|------------------|----|
| 1 | 130.0499 | 65.5286         |                |                  | 112.0393       | 56.5233          | E   |           |                 |                |                  |                |                  | 20 |
| 2 | 217.0819 | 109.0446        |                |                  | 199.0713       | 100.0393         | S   | 1886.8363 | 943.9218        | 1869.8097      | 935.4085         | 1868.8257      | 934.9165         | 19 |
| 3 | 330.1660 | 165.5866        |                |                  | 312.1554       | 156.5813         | L   | 1799.8042 | 900.4058        | 1782.7777      | 891.8925         | 1781.7937      | 891.4005         | 18 |
| 4 | 443.2500 | 222.1287        |                |                  | 425.2395       | 213.1234         | L   | 1686.7202 | 843.8637        | 1669.6936      | 835.3504         | 1668.7096      | 834.8584         | 17 |
| 5 | 530.2821 | 265.6447        |                |                  | 512.2715       | 256.6394         | S   | 1573.6361 | 787.3217        | 1556.6095      | 778.8084         | 1555.6255      | 778.3164         | 16 |
| 6 | 587.3035 | 294.1554        |                |                  | 569.2930       | 285.1501         | G   | 1486.6041 | 743.8057        | 1469.5775      | 735.2924         | 1468.5935      | 734.8004         | 15 |
| 7 | 716.3461 | 358.6767        |                |                  | 698.3355       | 349.6714         | E   | 1429.5826 | 715.2949        | 1412.5561      | 706.7817         | 1411.5720      | 706.2897         | 14 |
| 8 | 773.3676 | 387.1874        |                |                  | 755.3570       | 378.1821         | G   | 1300.5400 | 650.7736        | 1283.5135      | 642.2604         | 1282.5294      | 641.7684         | 13 |
| 9 | 901.4625 | 451.2349        | 884.4360       | 442.7216         | 883.4520       | 442.2296         | K   | 1243.5185 | 622.2629        | 1226.4920      | 613.7496         | 1225.5080      | 613.2576         | 12 |

|           |           |                 |           |                 |           |          |          |                  |          |                 |                 |                 |          |           |
|-----------|-----------|-----------------|-----------|-----------------|-----------|----------|----------|------------------|----------|-----------------|-----------------|-----------------|----------|-----------|
| <b>10</b> | 958.4840  | 479.7456        | 941.4575  | 471.2324        | 940.4734  | 470.7404 | <b>G</b> | <b>1115.4236</b> | 558.2154 | 1098.3970       | 549.7022        | 1097.4130       | 549.2101 | <b>11</b> |
| <b>11</b> | 1027.5055 | 514.2564        | 1010.4789 | 505.7431        | 1009.4949 | 505.2511 | <b>S</b> | 1058.4021        | 529.7047 | 1041.3756       | 521.1914        | 1040.3916       | 520.6994 | <b>10</b> |
| <b>12</b> | 1110.5426 | 555.7749        | 1093.5160 | <b>547.2617</b> | 1092.5320 | 546.7696 | <b>T</b> | <b>989.3807</b>  | 495.1940 | 972.3541        | 486.6807        | 971.3701        | 486.1887 | <b>9</b>  |
| <b>13</b> | 1225.5695 | 613.2884        | 1208.5430 | 604.7751        | 1207.5590 | 604.2831 | <b>D</b> | <b>906.3435</b>  | 453.6754 | 889.3170        | 445.1621        | 888.3330        | 444.6701 | <b>8</b>  |
| <b>14</b> | 1340.5965 | 670.8019        | 1323.5699 | 662.2886        | 1322.5859 | 661.7966 | <b>D</b> | <b>791.3166</b>  | 396.1619 | 774.2901        | 387.6487        | <b>773.3060</b> | 387.1567 | <b>7</b>  |
| <b>15</b> | 1469.6391 | 735.3232        | 1452.6125 | 726.8099        | 1451.6285 | 726.3179 | <b>E</b> | <b>676.2897</b>  | 338.6485 | 659.2631        | <b>330.1352</b> | <b>658.2791</b> | 329.6432 | <b>6</b>  |
| <b>16</b> | 1540.6762 | 770.8417        | 1523.6496 | 762.3284        | 1522.6656 | 761.8364 | <b>A</b> | <b>547.2471</b>  | 274.1272 | <b>530.2205</b> | 265.6139        | 529.2365        | 265.1219 | <b>5</b>  |
| <b>17</b> | 1669.7188 | 835.3630        | 1652.6922 | 826.8497        | 1651.7082 | 826.3577 | <b>E</b> | <b>476.2100</b>  | 238.6086 | 459.1834        | 230.0953        | 458.1994        | 229.6033 | <b>4</b>  |
| <b>18</b> | 1784.7457 | <b>892.8765</b> | 1767.7192 | 884.3632        | 1766.7351 | 883.8712 | <b>D</b> | <b>347.1674</b>  | 174.0873 | <b>330.1408</b> | 165.5740        | 329.1568        | 165.0820 | <b>3</b>  |
| <b>19</b> | 1841.7672 | 921.3872        | 1824.7406 | 912.8739        | 1823.7566 | 912.3819 | <b>G</b> | <b>232.1404</b>  | 116.5738 | 215.1139        | 108.0606        |                 |          | <b>2</b>  |
| <b>20</b> |           |                 |           |                 |           |          | <b>R</b> | <b>175.1190</b>  | 88.0631  | 158.0924        | 79.5498         |                 |          | <b>1</b>  |

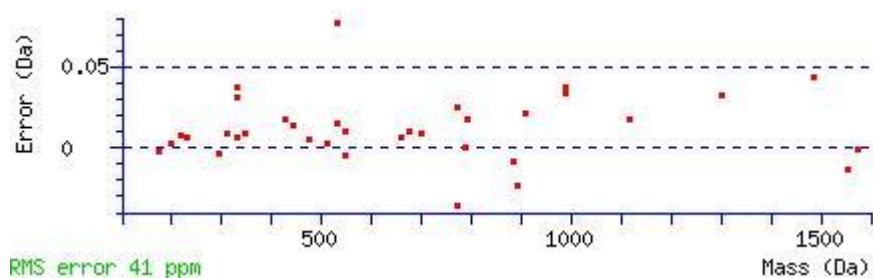

28\_MS/MS Fragmentation of **RAESLDPRPLRPAALPPTK**

Found in **O95180**, Voltage-dependent T-type calcium channel subunit alpha-1H OS=Homo sapiens GN=CACNA1H PE=1 SV=4

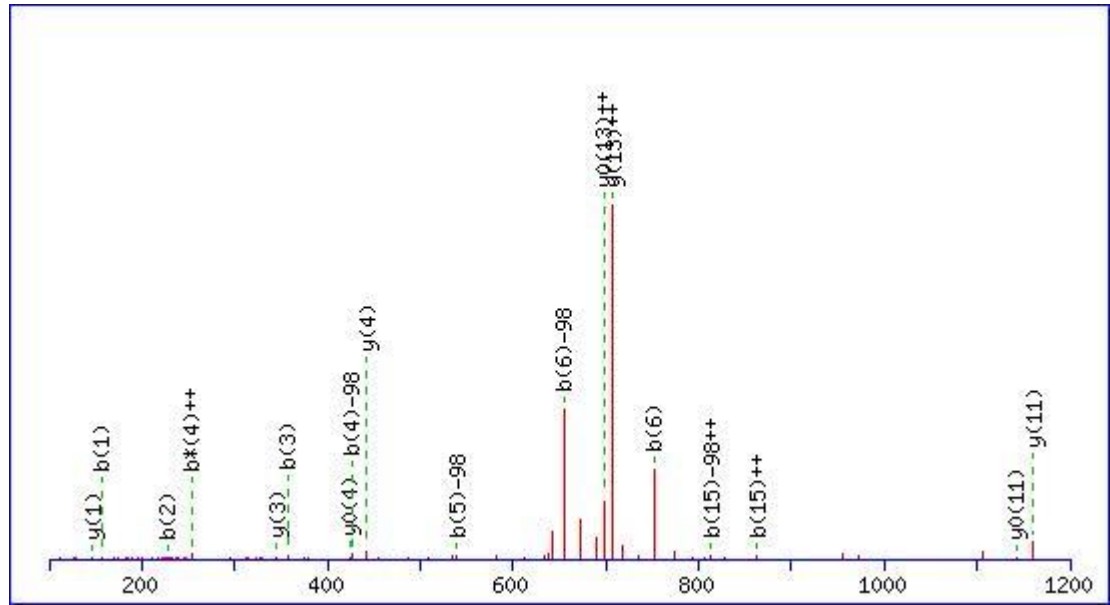

Monoisotopic mass of neutral peptide Mr(calc): 2164.1517

Variable modifications:

S4 : Phospho (ST), with neutral losses 97.9769(shown in table), 0.0000

Ions Score: 35 Expect: 0.53

Matches : 18/318 fragment ions using 29 most intense peaks (help)

| # | b             | b <sup>++</sup> | b <sup>*</sup> | b <sup>*++</sup> | b <sup>0</sup> | b <sup>0++</sup> | Seq | y             | y <sup>++</sup> | y <sup>*</sup> | y <sup>*++</sup> | y <sup>0</sup> | y <sup>0++</sup> | # |
|---|---------------|-----------------|----------------|------------------|----------------|------------------|-----|---------------|-----------------|----------------|------------------|----------------|------------------|---|
| 1 | 157.1084      | 79.0578         | 140.0818       | 70.5446          |                |                  | R   |               |                 |                |                  |                |                  | 1 |
| 2 | 228.1455      | 114.576<br>4    | 211.1190       | 106.063<br>1     |                |                  | A   | 1911.081<br>1 | 956.044<br>2    | 1894.054<br>5  | 947.530<br>9     | 1893.070<br>5  | 947.038<br>9     | 1 |
| 3 | 357.1881      | 179.097<br>7    | 340.1615       | 170.584<br>4     | 339.1775       | 170.092<br>4     | E   | 1840.043<br>9 | 920.525<br>6    | 1823.017<br>4  | 912.012<br>3     | 1822.033<br>4  | 911.520<br>3     | 1 |
| 4 | 426.2096      | 213.608<br>4    | 409.1830       | 205.095<br>1     | 408.1990       | 204.603<br>1     | S   | 1711.001<br>4 | 856.004<br>3    | 1693.974<br>8  | 847.491<br>0     | 1692.990<br>8  | 846.999<br>0     | 1 |
| 5 | 539.2936      | 270.150<br>4    | 522.2671       | 261.637<br>2     | 521.2831       | 261.145<br>2     | L   | 1641.979<br>9 | 821.493<br>6    | 1624.953<br>3  | 812.980<br>3     | 1623.969<br>3  | 812.488<br>3     | 1 |
| 6 | 654.3206      | 327.663<br>9    | 637.2940       | 319.150<br>6     | 636.3100       | 318.658<br>6     | D   | 1528.895<br>8 | 764.951<br>6    | 1511.869<br>3  | 756.438<br>3     | 1510.885<br>3  | 755.946<br>3     | 1 |
| 7 | 751.3733      | 376.190<br>3    | 734.3468       | 367.677<br>0     | 733.3628       | 367.185<br>0     | P   | 1413.868<br>9 | 707.438<br>1    | 1396.842<br>3  | 698.924<br>8     | 1395.858<br>3  | 698.432<br>8     | 1 |
| 8 | 907.4744      | 454.240<br>9    | 890.4479       | 445.727<br>6     | 889.4639       | 445.235<br>6     | R   | 1316.816<br>1 | 658.911<br>7    | 1299.789<br>6  | 650.398<br>4     | 1298.805<br>6  | 649.906<br>4     | 1 |
| 9 | 1004.527<br>2 | 502.767<br>2    | 987.5007       | 494.254<br>0     | 986.5166       | 493.762<br>0     | P   | 1160.715<br>0 | 580.861<br>1    | 1143.688<br>5  | 572.347<br>9     | 1142.704<br>4  | 571.855<br>9     | 1 |

|    |           |          |           |          |           |          |   |           |          |           |          |           |          |    |
|----|-----------|----------|-----------|----------|-----------|----------|---|-----------|----------|-----------|----------|-----------|----------|----|
| 10 | 1117.6113 | 559.3093 | 1100.5847 | 550.7960 | 1099.6007 | 550.3040 | L | 1063.6622 | 532.3348 | 1046.6357 | 523.8215 | 1045.6517 | 523.3295 | 10 |
| 11 | 1273.7124 | 637.3598 | 1256.6858 | 628.8466 | 1255.7018 | 628.3545 | R | 950.5782  | 475.7927 | 933.5516  | 467.2795 | 932.5676  | 466.7874 | 9  |
| 12 | 1370.7651 | 685.8862 | 1353.7386 | 677.3729 | 1352.7546 | 676.8809 | P | 794.4771  | 397.7422 | 777.4505  | 389.2289 | 776.4665  | 388.7369 | 8  |
| 13 | 1441.8023 | 721.4048 | 1424.7757 | 712.8915 | 1423.7917 | 712.3995 | A | 697.4243  | 349.2158 | 680.3978  | 340.7025 | 679.4137  | 340.2105 | 7  |
| 14 | 1512.8394 | 756.9233 | 1495.8128 | 748.4100 | 1494.8288 | 747.9180 | A | 626.3872  | 313.6972 | 609.3606  | 305.1840 | 608.3766  | 304.6920 | 6  |
| 15 | 1625.9234 | 813.4654 | 1608.8969 | 804.9521 | 1607.9129 | 804.4601 | L | 555.3501  | 278.1787 | 538.3235  | 269.6654 | 537.3395  | 269.1734 | 5  |
| 16 | 1722.9762 | 861.9917 | 1705.9496 | 853.4785 | 1704.9656 | 852.9865 | P | 442.2660  | 221.6366 | 425.2395  | 213.1234 | 424.2554  | 212.6314 | 4  |
| 17 | 1820.0290 | 910.5181 | 1803.0024 | 902.0048 | 1802.0184 | 901.5128 | P | 345.2132  | 173.1103 | 328.1867  | 164.5970 | 327.2027  | 164.1050 | 3  |
| 18 | 1921.0766 | 961.0420 | 1904.0501 | 952.5287 | 1903.0661 | 952.0367 | T | 248.1605  | 124.5839 | 231.1339  | 116.0706 | 230.1499  | 115.5786 | 2  |
| 19 |           |          |           |          |           |          | K | 147.1128  | 74.0600  | 130.0863  | 65.5468  |           |          | 1  |

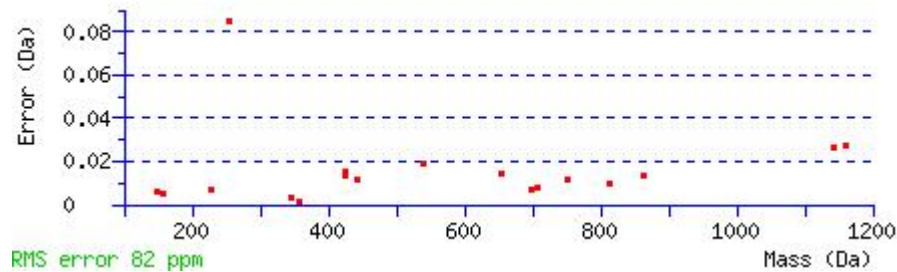

29\_MS/MS Fragmentation of **RRSTFPSPEAQR**

Found in **O95180**, Voltage-dependent T-type calcium channel subunit alpha-1H OS=Homo sapiens GN=CACNA1H PE=1 SV=4

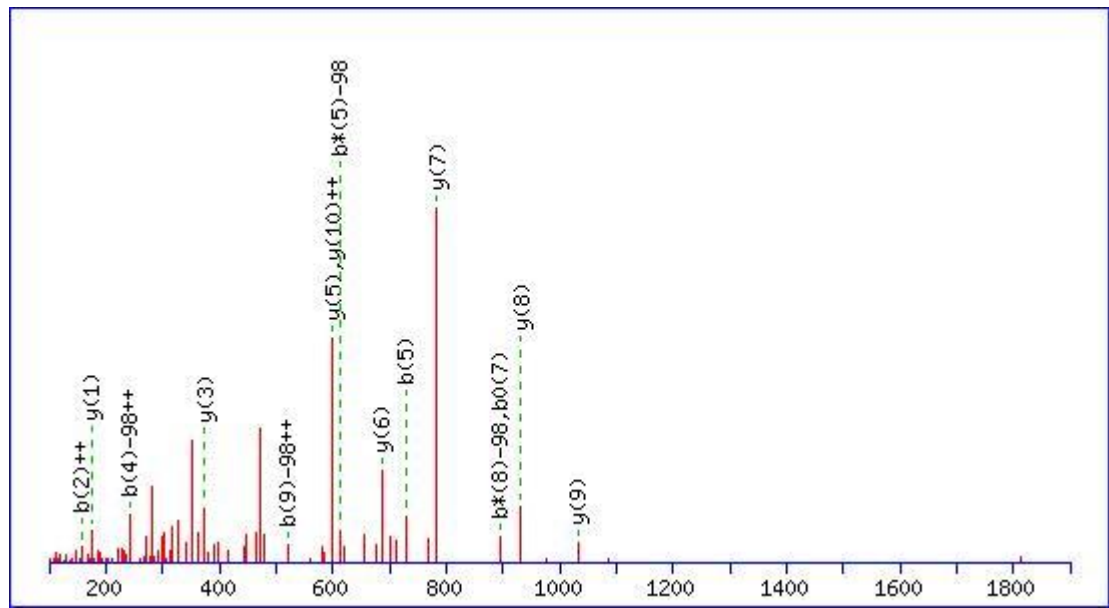

Monoisotopic mass of neutral peptide Mr(calc): 1510.7042

Variable modifications:

S3 : Phospho (ST), with neutral losses 0.0000(shown in table), 97.9769

Ions Score: 47 Expect: 0.046

Matches : 16/188 fragment ions using 19 most intense peaks ([help](#))

| # | b         | b <sup>++</sup> | b <sup>*</sup> | b <sup>*++</sup> | b <sup>0</sup> | b <sup>0++</sup> | Seq | y         | y <sup>++</sup> | y <sup>*</sup> | y <sup>*++</sup> | y <sup>0</sup> | y <sup>0++</sup> | # |
|---|-----------|-----------------|----------------|------------------|----------------|------------------|-----|-----------|-----------------|----------------|------------------|----------------|------------------|---|
| 1 | 157.1084  | 79.0578         | 140.0818       | 70.5446          |                |                  | R   |           |                 |                |                  |                |                  | 1 |
| 2 | 313.2095  | 157.1084        | 296.1829       | 148.5951         |                |                  | R   | 1355.6104 | 678.3088        | 1338.5838      | 669.7955         | 1337.5998      | 669.3035         | 1 |
| 3 | 480.2079  | 240.6076        | 463.1813       | 232.0943         | 462.1973       | 231.6023         | S   | 1199.5092 | 600.2583        | 1182.4827      | 591.7450         | 1181.4987      | 591.2530         | 1 |
| 4 | 581.2555  | 291.1314        | 564.2290       | 282.6181         | 563.2450       | 282.1261         | T   | 1032.5109 | 516.7591        | 1015.4843      | 508.2458         | 1014.5003      | 507.7538         | 9 |
| 5 | 728.3239  | 364.6656        | 711.2974       | 356.1523         | 710.3134       | 355.6603         | F   | 931.4632  | 466.2352        | 914.4367       | 457.7220         | 913.4526       | 457.2300         | 8 |
| 6 | 825.3767  | 413.1920        | 808.3502       | 404.6787         | 807.3661       | 404.1867         | P   | 784.3948  | 392.7010        | 767.3682       | 384.1878         | 766.3842       | 383.6958         | 7 |
| 7 | 912.4087  | 456.7080        | 895.3822       | 448.1947         | 894.3982       | 447.7027         | S   | 687.3420  | 344.1747        | 670.3155       | 335.6614         | 669.3315       | 335.1694         | 6 |
| 8 | 1009.4615 | 505.2344        | 992.4350       | 496.7211         | 991.4509       | 496.2291         | P   | 600.3100  | 300.6586        | 583.2835       | 292.1454         | 582.2994       | 291.6534         | 5 |
| 9 | 1138.5041 | 569.7557        | 1121.4776      | 561.2424         | 1120.4935      | 560.7504         | E   | 503.2572  | 252.1323        | 486.2307       | 243.6190         | 485.2467       | 243.1270         | 4 |

|    |           |          |           |          |           |          |   |          |          |          |          |  |  |   |
|----|-----------|----------|-----------|----------|-----------|----------|---|----------|----------|----------|----------|--|--|---|
| 10 | 1209.5412 | 605.2742 | 1192.5147 | 596.7610 | 1191.5306 | 596.2690 | A | 374.2146 | 187.6110 | 357.1881 | 179.0977 |  |  | 3 |
| 11 | 1337.5998 | 669.3035 | 1320.5732 | 660.7903 | 1319.5892 | 660.2983 | Q | 303.1775 | 152.0924 | 286.1510 | 143.5791 |  |  | 2 |
| 12 |           |          |           |          |           |          | R | 175.1190 | 88.0631  | 158.0924 | 79.5498  |  |  | 1 |

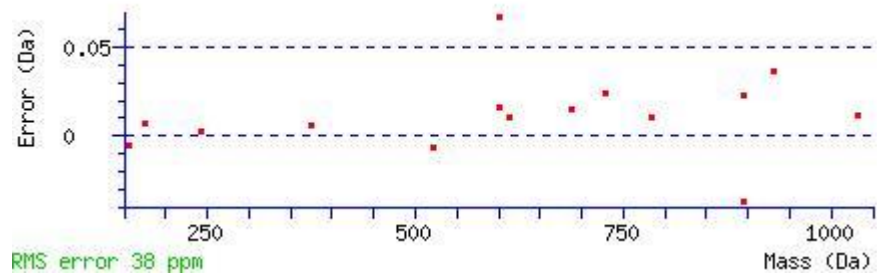

30\_MS/MS Fragmentation of **RRSTFPSPEAQR**

Found in **O95180**, Voltage-dependent T-type calcium channel subunit alpha-1H OS=Homo sapiens GN=CACNA1H PE=1 SV=4

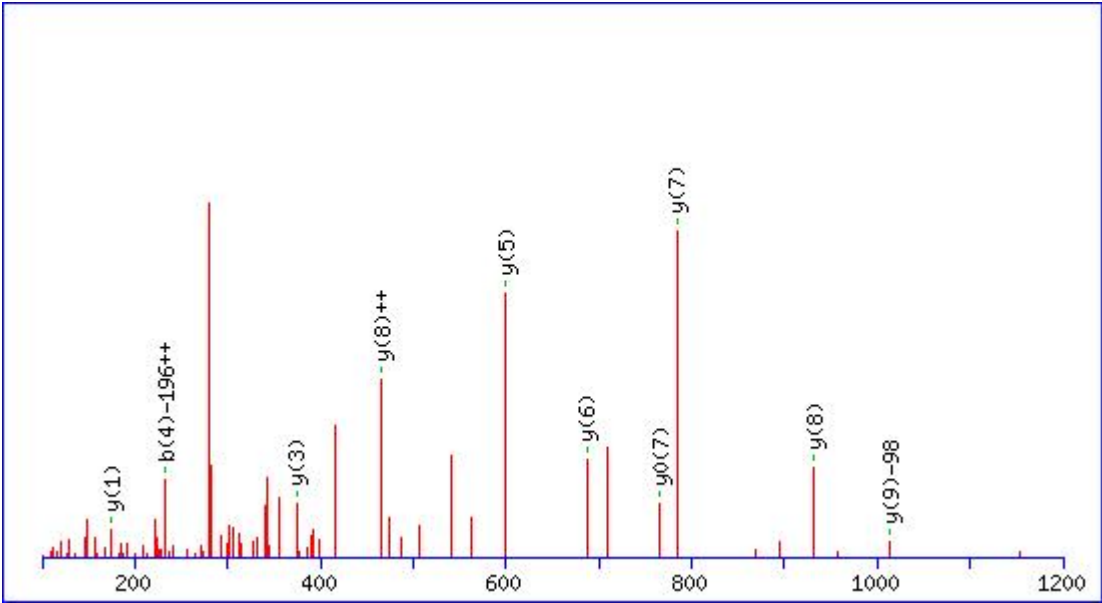

Monoisotopic mass of neutral peptide Mr(calc): 1590.6705

Variable modifications:

S3 : Phospho (ST), with neutral losses 97.9769(shown in table), 0.0000

T4 : Phospho (ST), with neutral losses 97.9769(shown in table), 0.0000

Ions Score: 32 Expect: 1.4

Matches : 10/194 fragment ions using 25 most intense peaks ([help](#))

| # | b         | b <sup>++</sup> | b <sup>*</sup> | b <sup>***</sup> | b <sup>0</sup> | b <sup>0++</sup> | Seq | y         | y <sup>++</sup> | y <sup>*</sup> | y <sup>***</sup> | y <sup>0</sup> | y <sup>0++</sup> | # |
|---|-----------|-----------------|----------------|------------------|----------------|------------------|-----|-----------|-----------------|----------------|------------------|----------------|------------------|---|
| 1 | 157.1084  | 79.0578         | 140.0818       | 70.5446          |                |                  | R   |           |                 |                |                  |                |                  | 1 |
| 2 | 313.2095  | 157.1084        | 296.1829       | 148.5951         |                |                  | R   | 1239.6229 | 620.3151        | 1222.5963      | 611.8018         | 1221.6123      | 611.3098         | 1 |
| 3 | 382.2310  | 191.6191        | 365.2044       | 183.1058         | 364.2204       | 182.6138         | S   | 1083.5218 | 542.2645        | 1066.4952      | 533.7513         | 1065.5112      | 533.2592         | 1 |
| 4 | 465.2681  | 233.1377        | 448.2415       | 224.6244         | 447.2575       | 224.1324         | T   | 1014.5003 | 507.7538        | 997.4738       | 499.2405         | 996.4898       | 498.7485         | 9 |
| 5 | 612.3365  | 306.6719        | 595.3099       | 298.1586         | 594.3259       | 297.6666         | F   | 931.4632  | 466.2352        | 914.4367       | 457.7220         | 913.4526       | 457.2300         | 8 |
| 6 | 709.3893  | 355.1983        | 692.3627       | 346.6850         | 691.3787       | 346.1930         | P   | 784.3948  | 392.7010        | 767.3682       | 384.1878         | 766.3842       | 383.6958         | 7 |
| 7 | 796.4213  | 398.7143        | 779.3947       | 390.2010         | 778.4107       | 389.7090         | S   | 687.3420  | 344.1747        | 670.3155       | 335.6614         | 669.3315       | 335.1694         | 6 |
| 8 | 893.4740  | 447.2407        | 876.4475       | 438.7274         | 875.4635       | 438.2354         | P   | 600.3100  | 300.6586        | 583.2835       | 292.1454         | 582.2994       | 291.6534         | 5 |
| 9 | 1022.5166 | 511.7620        | 1005.4901      | 503.2487         | 1004.5061      | 502.7567         | E   | 503.2572  | 252.1323        | 486.2307       | 243.6190         | 485.2467       | 243.1270         | 4 |

|    |           |          |           |          |           |          |   |          |          |          |          |  |  |   |
|----|-----------|----------|-----------|----------|-----------|----------|---|----------|----------|----------|----------|--|--|---|
| 10 | 1093.5538 | 547.2805 | 1076.5272 | 538.7672 | 1075.5432 | 538.2752 | A | 374.2146 | 187.6110 | 357.1881 | 179.0977 |  |  | 3 |
| 11 | 1221.6123 | 611.3098 | 1204.5858 | 602.7965 | 1203.6018 | 602.3045 | Q | 303.1775 | 152.0924 | 286.1510 | 143.5791 |  |  | 2 |
| 12 |           |          |           |          |           |          | R | 175.1190 | 88.0631  | 158.0924 | 79.5498  |  |  | 1 |

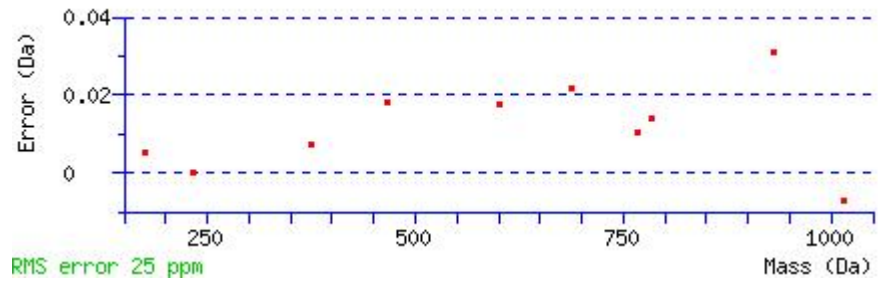

31\_MS/MS Fragmentation of **STFPSPEAQR**

Found in **O95180**, Voltage-dependent T-type calcium channel subunit alpha-1H OS=Homo sapiens GN=CACNA1H PE=1 SV=4

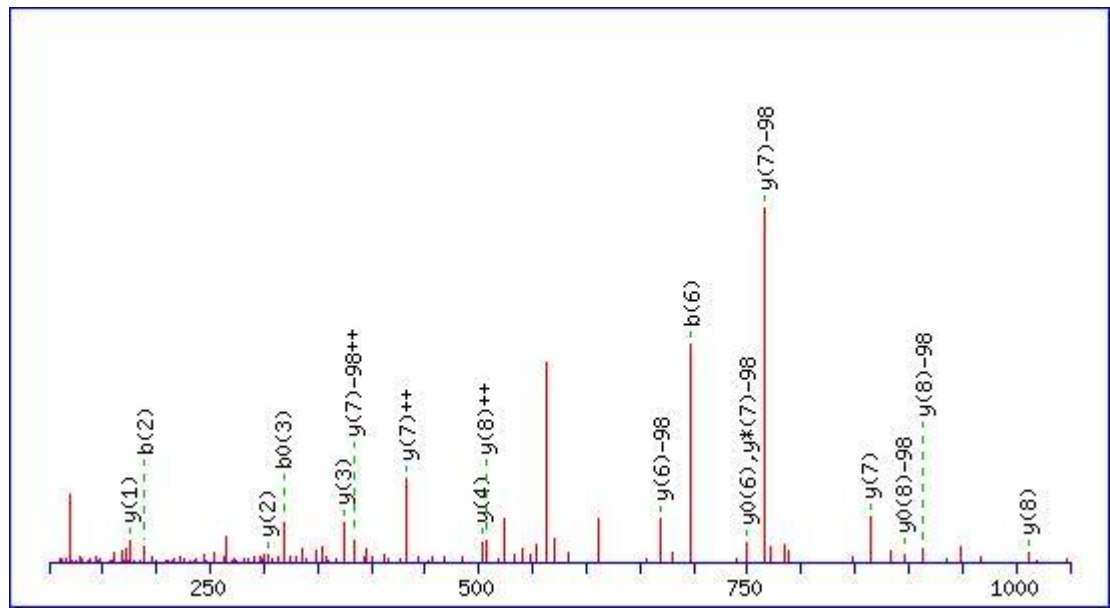

Monoisotopic mass of neutral peptide Mr(calc): 1198.5020

Variable modifications:

S5 : Phospho (ST), with neutral losses 0.0000(shown in table), 97.9769

Ions Score: 34 Expect: 0.76

Matches : 18/132 fragment ions using 30 most intense peaks ([help](#))

| # | b             | b <sup>++</sup> | b <sup>*</sup> | b <sup>***</sup> | b <sup>0</sup> | b <sup>0++</sup> | Seq | y             | y <sup>++</sup> | y <sup>*</sup> | y <sup>***</sup> | y <sup>0</sup> | y <sup>0++</sup> | #  |
|---|---------------|-----------------|----------------|------------------|----------------|------------------|-----|---------------|-----------------|----------------|------------------|----------------|------------------|----|
| 1 | 88.0393       | 44.5233         |                |                  | 70.0287        | 35.5180          | S   |               |                 |                |                  |                |                  | 10 |
| 2 | 189.0870      | 95.0471         |                |                  | 171.0764       | 86.0418          | T   | 1112.477<br>2 | 556.742<br>2    | 1095.450<br>7  | 548.229<br>0     | 1094.466<br>7  | 547.737<br>0     | 9  |
| 3 | 336.1554      | 168.581<br>3    |                |                  | 318.1448       | 159.576<br>1     | F   | 1011.429<br>5 | 506.218<br>4    | 994.4030       | 497.705<br>1     | 993.4190       | 497.213<br>1     | 8  |
| 4 | 433.2082      | 217.107<br>7    |                |                  | 415.1976       | 208.102<br>4     | P   | 864.3611      | 432.684<br>2    | 847.3346       | 424.170<br>9     | 846.3506       | 423.678<br>9     | 7  |
| 5 | 600.2065      | 300.606<br>9    |                |                  | 582.1960       | 291.601<br>6     | S   | 767.3084      | 384.157<br>8    | 750.2818       | 375.644<br>5     | 749.2978       | 375.152<br>5     | 6  |
| 6 | 697.2593      | 349.133<br>3    |                |                  | 679.2487       | 340.128<br>0     | P   | 600.3100      | 300.658<br>6    | 583.2835       | 292.145<br>4     | 582.2994       | 291.653<br>4     | 5  |
| 7 | 826.3019      | 413.654<br>6    |                |                  | 808.2913       | 404.649<br>3     | E   | 503.2572      | 252.132<br>3    | 486.2307       | 243.619<br>0     | 485.2467       | 243.127<br>0     | 4  |
| 8 | 897.3390      | 449.173<br>1    |                |                  | 879.3284       | 440.167<br>9     | A   | 374.2146      | 187.611<br>0    | 357.1881       | 179.097<br>7     |                |                  | 3  |
| 9 | 1025.397<br>6 | 513.202<br>4    | 1008.371<br>0  | 504.689<br>1     | 1007.387<br>0  | 504.197<br>1     | Q   | 303.1775      | 152.092<br>4    | 286.1510       | 143.579<br>1     |                |                  | 2  |

|   |  |  |  |  |  |  |   |          |         |          |         |  |  |   |
|---|--|--|--|--|--|--|---|----------|---------|----------|---------|--|--|---|
| 1 |  |  |  |  |  |  | R | 175.1190 | 88.0631 | 158.0924 | 79.5498 |  |  | 1 |
| 0 |  |  |  |  |  |  |   |          |         |          |         |  |  |   |

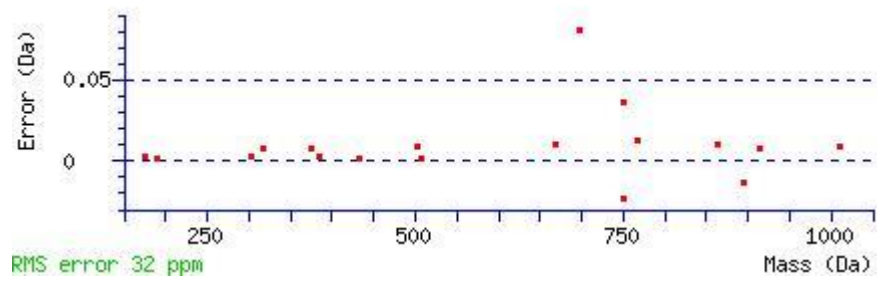

32\_MS/MS Fragmentation of **RPYYADYSPTRR**

Found in **O95180**, Voltage-dependent T-type calcium channel subunit alpha-1H OS=Homo sapiens GN=CACNA1H PE=1 SV=4

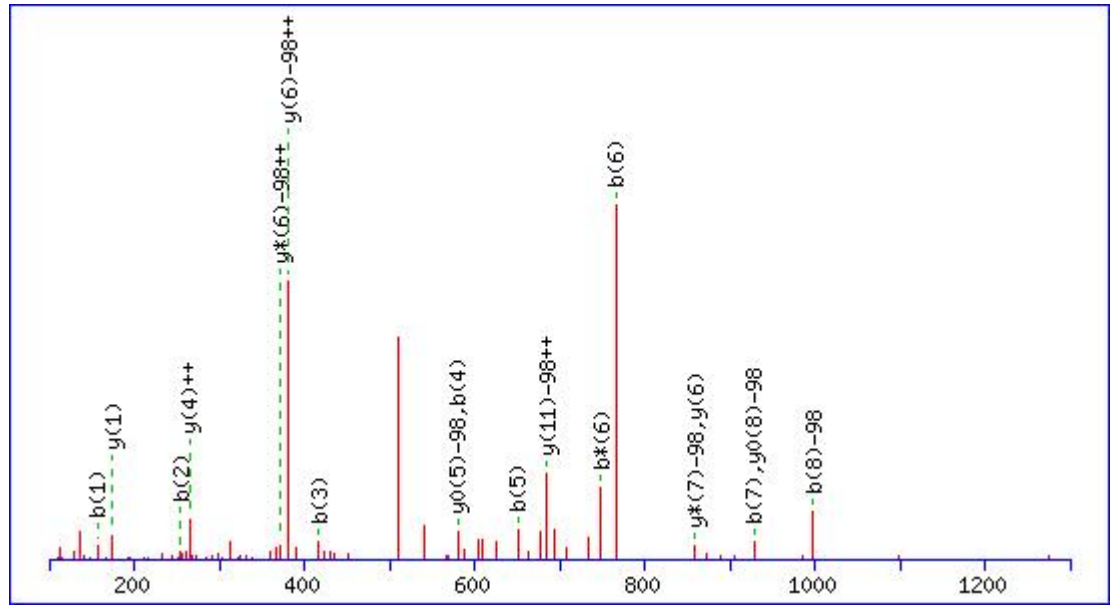

Monoisotopic mass of neutral peptide Mr(calc): 1623.7195

Variable modifications:

S8 : Phospho (ST), with neutral losses 97.9769(shown in table), 0.0000

Ions Score: 46 Expect: 0.056

Matches : 18/184 fragment ions using 29 most intense peaks ([help](#))

| # | b             | b <sup>++</sup> | b <sup>*</sup> | b <sup>*++</sup> | b <sup>0</sup> | b <sup>0++</sup> | Seq | y             | y <sup>++</sup> | y <sup>*</sup> | y <sup>*++</sup> | y <sup>0</sup> | y <sup>0++</sup> | # |
|---|---------------|-----------------|----------------|------------------|----------------|------------------|-----|---------------|-----------------|----------------|------------------|----------------|------------------|---|
| 1 | 157.1084      | 79.0578         | 140.0818       | 70.5446          |                |                  | R   |               |                 |                |                  |                |                  | 1 |
| 2 | 254.1612      | 127.584<br>2    | 237.1346       | 119.070<br>9     |                |                  | P   | 1370.648<br>8 | 685.828<br>0    | 1353.622<br>2  | 677.314<br>8     | 1352.638<br>2  | 676.822<br>7     | 1 |
| 3 | 417.2245      | 209.115<br>9    | 400.1979       | 200.602<br>6     |                |                  | Y   | 1273.596<br>0 | 637.301<br>6    | 1256.569<br>5  | 628.788<br>4     | 1255.585<br>4  | 628.296<br>4     | 1 |
| 4 | 580.2878      | 290.647<br>5    | 563.2613       | 282.134<br>3     |                |                  | Y   | 1110.532<br>7 | 555.770<br>0    | 1093.506<br>1  | 547.256<br>7     | 1092.522<br>1  | 546.764<br>7     | 9 |
| 5 | 651.3249      | 326.166<br>1    | 634.2984       | 317.652<br>8     |                |                  | A   | 947.4694      | 474.238<br>3    | 930.4428       | 465.725<br>0     | 929.4588       | 465.233<br>0     | 8 |
| 6 | 766.3519      | 383.679<br>6    | 749.3253       | 375.166<br>3     | 748.3413       | 374.674<br>3     | D   | 876.4322      | 438.719<br>8    | 859.4057       | 430.206<br>5     | 858.4217       | 429.714<br>5     | 7 |
| 7 | 929.4152      | 465.211<br>2    | 912.3886       | 456.698<br>0     | 911.4046       | 456.206<br>0     | Y   | 761.4053      | 381.206<br>3    | 744.3787       | 372.693<br>0     | 743.3947       | 372.201<br>0     | 6 |
| 8 | 998.4367      | 499.722<br>0    | 981.4101       | 491.208<br>7     | 980.4261       | 490.716<br>7     | S   | 598.3420      | 299.674<br>6    | 581.3154       | 291.161<br>3     | 580.3314       | 290.669<br>3     | 5 |
| 9 | 1095.489<br>4 | 548.248<br>3    | 1078.462<br>9  | 539.735<br>1     | 1077.478<br>9  | 539.243<br>1     | P   | 529.3205      | 265.163<br>9    | 512.2940       | 256.650<br>6     | 511.3099       | 256.158<br>6     | 4 |

|    |           |          |           |          |           |          |   |          |          |          |          |          |          |   |
|----|-----------|----------|-----------|----------|-----------|----------|---|----------|----------|----------|----------|----------|----------|---|
| 10 | 1196.5371 | 598.7722 | 1179.5106 | 590.2589 | 1178.5265 | 589.7669 | T | 432.2677 | 216.6375 | 415.2412 | 208.1242 | 414.2572 | 207.6322 | 3 |
| 11 | 1352.6382 | 676.8227 | 1335.6117 | 668.3095 | 1334.6276 | 667.8175 | R | 331.2201 | 166.1137 | 314.1935 | 157.6004 |          |          | 2 |
| 12 |           |          |           |          |           |          | R | 175.1190 | 88.0631  | 158.0924 | 79.5498  |          |          | 1 |

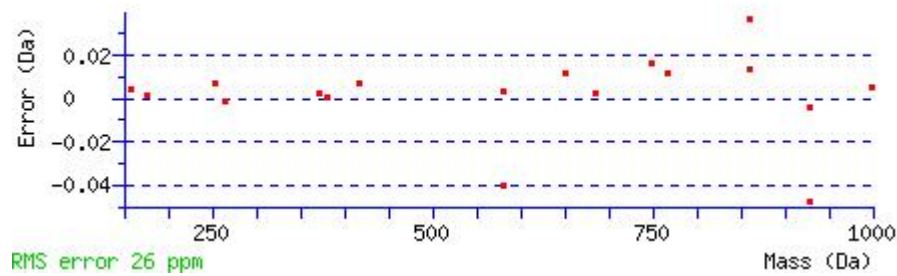

33\_MS/MS Fragmentation of **VDADRPPLQESPGAR**

Found in **O95180**, Voltage-dependent T-type calcium channel subunit alpha-1H OS=Homo sapiens GN=CACNA1H PE=1 SV=4

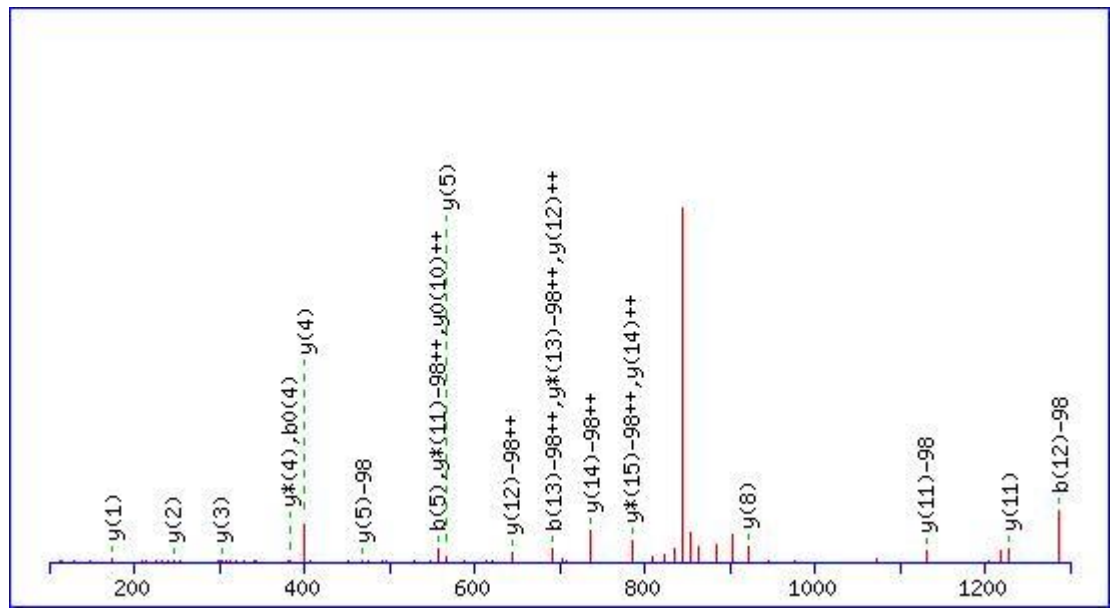

Monoisotopic mass of neutral peptide Mr(calc): 1783.8254

Variable modifications:

S12 : Phospho (ST), with neutral losses 0.0000(shown in table), 97.9769

Ions Score: 50 Expect: 0.028

Matches : 22/252 fragment ions using 23 most intense peaks ([help](#))

| # | b        | b <sup>++</sup> | b <sup>*</sup> | b <sup>***</sup> | b <sup>0</sup> | b <sup>0++</sup> | Seq | y         | y <sup>++</sup> | y <sup>*</sup> | y <sup>***</sup> | y <sup>0</sup> | y <sup>0++</sup> | #  |
|---|----------|-----------------|----------------|------------------|----------------|------------------|-----|-----------|-----------------|----------------|------------------|----------------|------------------|----|
| 1 | 100.0757 | 50.5415         |                |                  |                |                  | V   |           |                 |                |                  |                |                  | 1  |
| 2 | 215.1026 | 108.0550        |                |                  | 197.0921       | 99.0497          | D   | 1685.7643 | 843.3858        | 1668.7377      | 834.8725         | 1667.7537      | 834.3805         | 15 |
| 3 | 286.1397 | 143.5735        |                |                  | 268.1292       | 134.5682         | A   | 1570.7373 | 785.8723        | 1553.7108      | 777.3590         | 1552.7268      | 776.8670         | 14 |
| 4 | 401.1667 | 201.0870        |                |                  | 383.1561       | 192.0817         | D   | 1499.7002 | 750.3538        | 1482.6737      | 741.8405         | 1481.6897      | 741.3485         | 13 |
| 5 | 557.2678 | 279.1375        | 540.2413       | 270.6243         | 539.2572       | 270.1323         | R   | 1384.6733 | 692.8403        | 1367.6467      | 684.3270         | 1366.6627      | 683.8350         | 12 |
| 6 | 654.3206 | 327.6639        | 637.2940       | 319.1506         | 636.3100       | 318.6586         | P   | 1228.5722 | 614.7897        | 1211.5456      | 606.2765         | 1210.5616      | 605.7844         | 11 |
| 7 | 751.3733 | 376.1903        | 734.3468       | 367.6770         | 733.3628       | 367.1850         | P   | 1131.5194 | 566.2633        | 1114.4929      | 557.7501         | 1113.5089      | 557.2581         | 10 |
| 8 | 864.4574 | 432.7323        | 847.4308       | 424.2191         | 846.4468       | 423.7271         | L   | 1034.4667 | 517.7370        | 1017.4401      | 509.2237         | 1016.4561      | 508.7317         | 9  |
| 9 | 961.5102 | 481.2587        | 944.4836       | 472.7454         | 943.4996       | 472.2534         | P   | 921.3826  | 461.1949        | 904.3560       | 452.6817         | 903.3720       | 452.1896         | 8  |

|    |           |          |           |          |           |          |   |          |          |          |          |          |          |   |
|----|-----------|----------|-----------|----------|-----------|----------|---|----------|----------|----------|----------|----------|----------|---|
| 10 | 1089.5687 | 545.2880 | 1072.5422 | 536.7747 | 1071.5582 | 536.2827 | Q | 824.3298 | 412.6686 | 807.3033 | 404.1553 | 806.3193 | 403.6633 | 7 |
| 11 | 1218.6113 | 609.8093 | 1201.5848 | 601.2960 | 1200.6008 | 600.8040 | E | 696.2712 | 348.6393 | 679.2447 | 340.1260 | 678.2607 | 339.6340 | 6 |
| 12 | 1385.6097 | 693.3085 | 1368.5831 | 684.7952 | 1367.5991 | 684.3032 | S | 567.2287 | 284.1180 | 550.2021 | 275.6047 | 549.2181 | 275.1127 | 5 |
| 13 | 1482.6625 | 741.8349 | 1465.6359 | 733.3216 | 1464.6519 | 732.8296 | P | 400.2303 | 200.6188 | 383.2037 | 192.1055 |          |          | 4 |
| 14 | 1539.6839 | 770.3456 | 1522.6574 | 761.8323 | 1521.6734 | 761.3403 | G | 303.1775 | 152.0924 | 286.1510 | 143.5791 |          |          | 3 |
| 15 | 1610.7210 | 805.8642 | 1593.6945 | 797.3509 | 1592.7105 | 796.8589 | A | 246.1561 | 123.5817 | 229.1295 | 115.0684 |          |          | 2 |
| 16 |           |          |           |          |           |          | R | 175.1190 | 88.0631  | 158.0924 | 79.5498  |          |          | 1 |

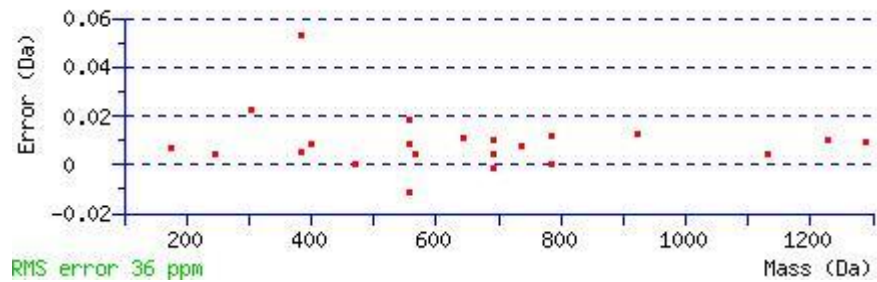

34\_MS/MS Fragmentation of **SGEPLHALSPR**

Found in **O95180**, Voltage-dependent T-type calcium channel subunit alpha-1H OS=Homo sapiens GN=CACNA1H PE=1 SV=4

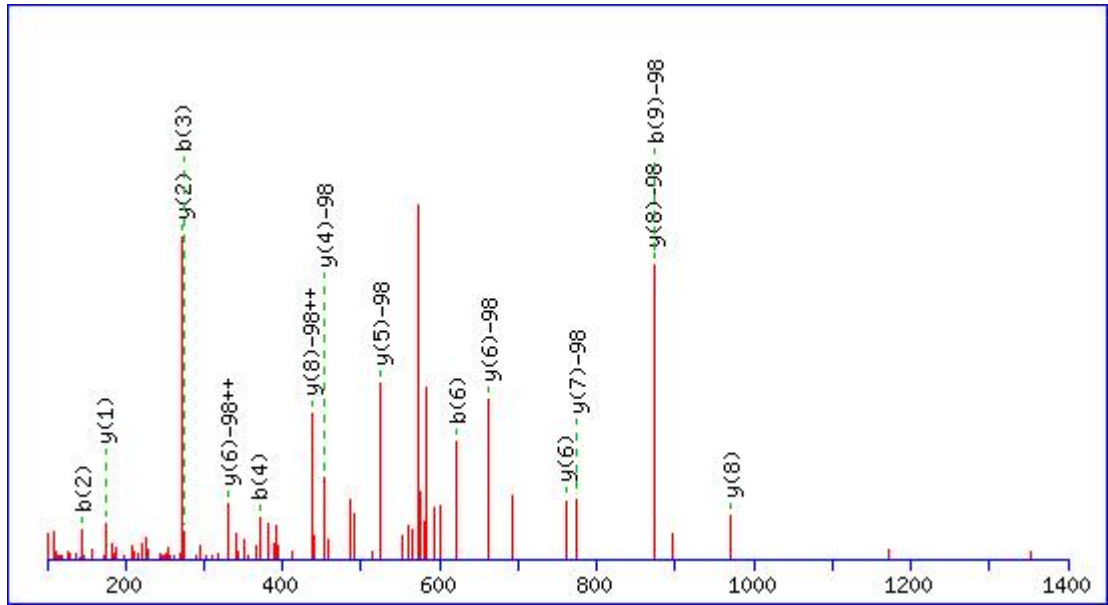

Monoisotopic mass of neutral peptide Mr(calc): 1242.5758

Variable modifications:

S9 : Phospho (ST), with neutral losses 97.9769(shown in table), 0.0000

Ions Score: 62 Expect: 0.0013

Matches : 16/152 fragment ions using 18 most intense peaks ([help](#))

| #  | b        | b <sup>++</sup> | b <sup>0</sup> | b <sup>0++</sup> | Seq. | y         | y <sup>++</sup> | y <sup>*</sup> | y <sup>*++</sup> | y <sup>0</sup> | y <sup>0++</sup> | #  |
|----|----------|-----------------|----------------|------------------|------|-----------|-----------------|----------------|------------------|----------------|------------------|----|
| 1  | 88.0393  | 44.5233         | 70.0287        | 35.5180          | S    |           |                 |                |                  |                |                  | 11 |
| 2  | 145.0608 | 73.0340         | 127.0502       | 64.0287          | G    | 1058.5742 | 529.7907        | 1041.5476      | 521.2774         | 1040.5636      | 520.7854         | 10 |
| 3  | 274.1034 | 137.5553        | 256.0928       | 128.5500         | E    | 1001.5527 | 501.2800        | 984.5261       | 492.7667         | 983.5421       | 492.2747         | 9  |
| 4  | 371.1561 | 186.0817        | 353.1456       | 177.0764         | P    | 872.5101  | 436.7587        | 855.4835       | 428.2454         | 854.4995       | 427.7534         | 8  |
| 5  | 484.2402 | 242.6237        | 466.2296       | 233.6185         | L    | 775.4573  | 388.2323        | 758.4308       | 379.7190         | 757.4468       | 379.2270         | 7  |
| 6  | 621.2991 | 311.1532        | 603.2885       | 302.1479         | H    | 662.3733  | 331.6903        | 645.3467       | 323.1770         | 644.3627       | 322.6850         | 6  |
| 7  | 692.3362 | 346.6717        | 674.3257       | 337.6665         | A    | 525.3144  | 263.1608        | 508.2878       | 254.6475         | 507.3038       | 254.1555         | 5  |
| 8  | 805.4203 | 403.2138        | 787.4097       | 394.2085         | L    | 454.2772  | 227.6423        | 437.2507       | 219.1290         | 436.2667       | 218.6370         | 4  |
| 9  | 874.4417 | 437.7245        | 856.4312       | 428.7192         | S    | 341.1932  | 171.1002        | 324.1666       | 162.5870         | 323.1826       | 162.0949         | 3  |
| 10 | 971.4945 | 486.2509        | 953.4839       | 477.2456         | P    | 272.1717  | 136.5895        | 255.1452       | 128.0762         |                |                  | 2  |
| 11 |          |                 |                |                  | R    | 175.1190  | 88.0631         | 158.0924       | 79.5498          |                |                  | 1  |

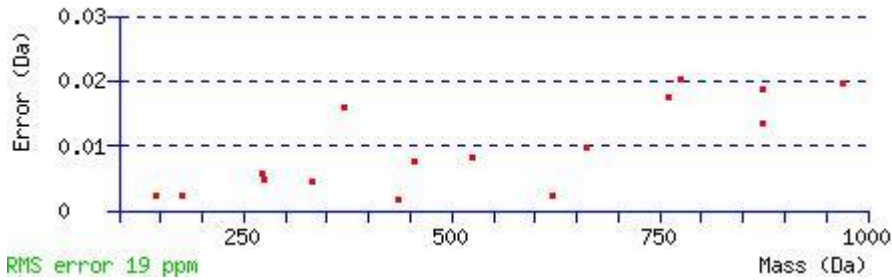

35\_MS/MS Fragmentation of **IDSPRDTLDPAEPGEK**

Found in **O95180**, Voltage-dependent T-type calcium channel subunit alpha-1H OS=Homo sapiens GN=CACNA1H PE=1 SV=4

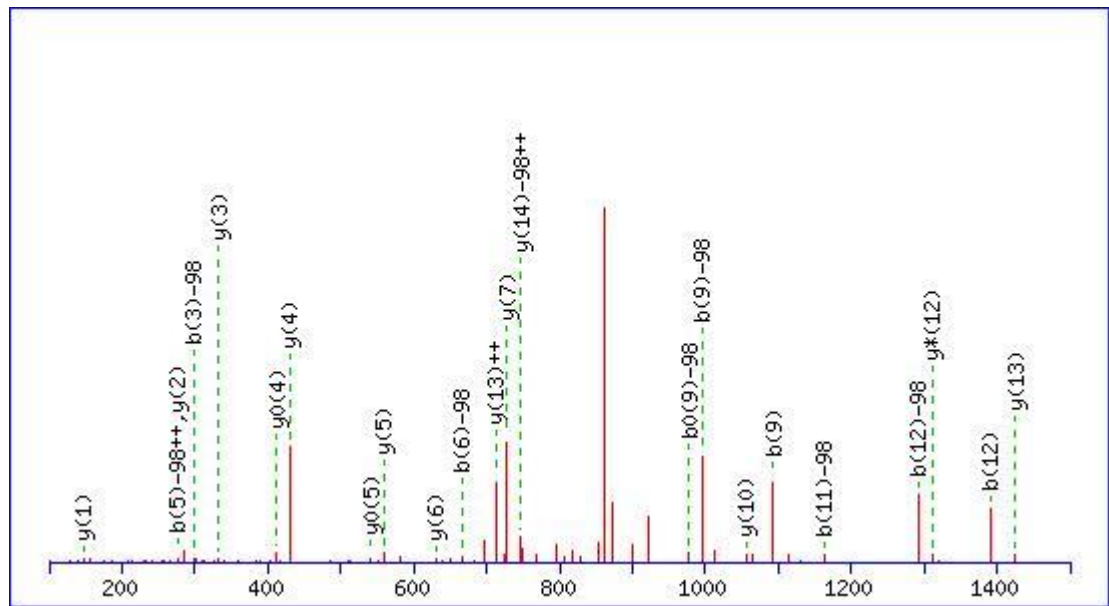

Monoisotopic mass of neutral peptide Mr(calc): 1818.8037

Variable modifications:

S3 : Phospho (ST), with neutral losses 0.0000(shown in table), 97.9769

Ions Score: 55 Expect: 0.0083

Matches : 23/254 fragment ions using 38 most intense peaks ([help](#))

| # | b         | b <sup>++</sup> | b <sup>*</sup> | b <sup>***</sup> | b <sup>0</sup> | b <sup>0++</sup> | Seq | y         | y <sup>++</sup> | y <sup>*</sup> | y <sup>***</sup> | y <sup>0</sup> | y <sup>0++</sup> | #  |
|---|-----------|-----------------|----------------|------------------|----------------|------------------|-----|-----------|-----------------|----------------|------------------|----------------|------------------|----|
| 1 | 114.0913  | 57.5493         |                |                  |                |                  | I   |           |                 |                |                  |                |                  | 16 |
| 2 | 229.1183  | 115.0628        |                |                  | 211.1077       | 106.0575         | D   | 1706.7269 | 853.8671        | 1689.7004      | 845.3538         | 1688.7163      | 844.8618         | 15 |
| 3 | 396.1166  | 198.5620        |                |                  | 378.1061       | 189.5567         | S   | 1591.7000 | 796.3536        | 1574.6734      | 787.8403         | 1573.6894      | 787.3483         | 14 |
| 4 | 493.1694  | 247.0883        |                |                  | 475.1588       | 238.0831         | P   | 1424.7016 | 712.8544        | 1407.6751      | 704.3412         | 1406.6910      | 703.8492         | 13 |
| 5 | 649.2705  | 325.1389        | 632.2440       | 316.6256         | 631.2600       | 316.1336         | R   | 1327.6488 | 664.3281        | 1310.6223      | 655.8148         | 1309.6383      | 655.3228         | 12 |
| 6 | 764.2975  | 382.6524        | 747.2709       | 374.1391         | 746.2869       | 373.6471         | D   | 1171.5477 | 586.2775        | 1154.5212      | 577.7642         | 1153.5372      | 577.2722         | 11 |
| 7 | 865.3451  | 433.1762        | 848.3186       | 424.6629         | 847.3346       | 424.1709         | T   | 1056.5208 | 528.7640        | 1039.4942      | 520.2508         | 1038.5102      | 519.7587         | 10 |
| 8 | 978.4292  | 489.7182        | 961.4027       | 481.2050         | 960.4186       | 480.7130         | L   | 955.4731  | 478.2402        | 938.4466       | 469.7269         | 937.4625       | 469.2349         | 9  |
| 9 | 1093.4561 | 547.2317        | 1076.4296      | 538.7184         | 1075.4456      | 538.2264         | D   | 842.3890  | 421.6982        | 825.3625       | 413.1849         | 824.3785       | 412.6929         | 8  |

|           |                  |          |           |          |           |          |          |                 |          |          |          |                 |          |          |
|-----------|------------------|----------|-----------|----------|-----------|----------|----------|-----------------|----------|----------|----------|-----------------|----------|----------|
| <b>10</b> | 1190.5089        | 595.7581 | 1173.4824 | 587.2448 | 1172.4983 | 586.7528 | <b>P</b> | <b>727.3621</b> | 364.1847 | 710.3355 | 355.6714 | 709.3515        | 355.1794 | <b>7</b> |
| <b>11</b> | 1261.5460        | 631.2767 | 1244.5195 | 622.7634 | 1243.5355 | 622.2714 | <b>A</b> | <b>630.3093</b> | 315.6583 | 613.2828 | 307.1450 | 612.2988        | 306.6530 | <b>6</b> |
| <b>12</b> | <b>1390.5886</b> | 695.7979 | 1373.5621 | 687.2847 | 1372.5781 | 686.7927 | <b>E</b> | <b>559.2722</b> | 280.1397 | 542.2457 | 271.6265 | <b>541.2617</b> | 271.1345 | <b>5</b> |
| <b>13</b> | 1487.6414        | 744.3243 | 1470.6148 | 735.8111 | 1469.6308 | 735.3190 | <b>P</b> | <b>430.2296</b> | 215.6185 | 413.2031 | 207.1052 | <b>412.2191</b> | 206.6132 | <b>4</b> |
| <b>14</b> | 1544.6628        | 772.8351 | 1527.6363 | 764.3218 | 1526.6523 | 763.8298 | <b>G</b> | <b>333.1769</b> | 167.0921 | 316.1503 | 158.5788 | 315.1663        | 158.0868 | <b>3</b> |
| <b>15</b> | 1673.7054        | 837.3564 | 1656.6789 | 828.8431 | 1655.6949 | 828.3511 | <b>E</b> | <b>276.1554</b> | 138.5813 | 259.1288 | 130.0681 | 258.1448        | 129.5761 | <b>2</b> |
| <b>16</b> |                  |          |           |          |           |          | <b>K</b> | <b>147.1128</b> | 74.0600  | 130.0863 | 65.5468  |                 |          | <b>1</b> |

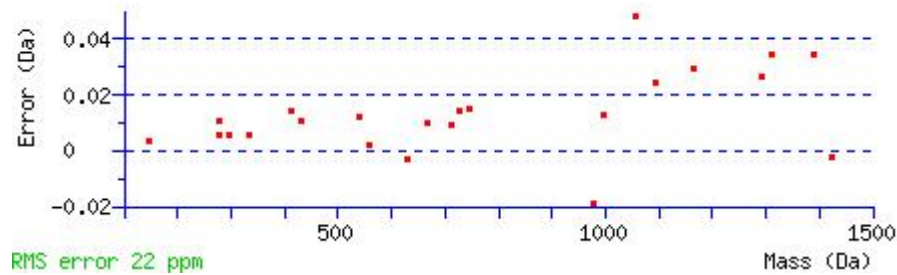

36\_MS/MS Fragmentation of **TPVRPVTQGGSLQSPPR**

Found in **O95180**, Voltage-dependent T-type calcium channel subunit alpha-1H OS=Homo sapiens GN=CACNA1H PE=1 SV=4

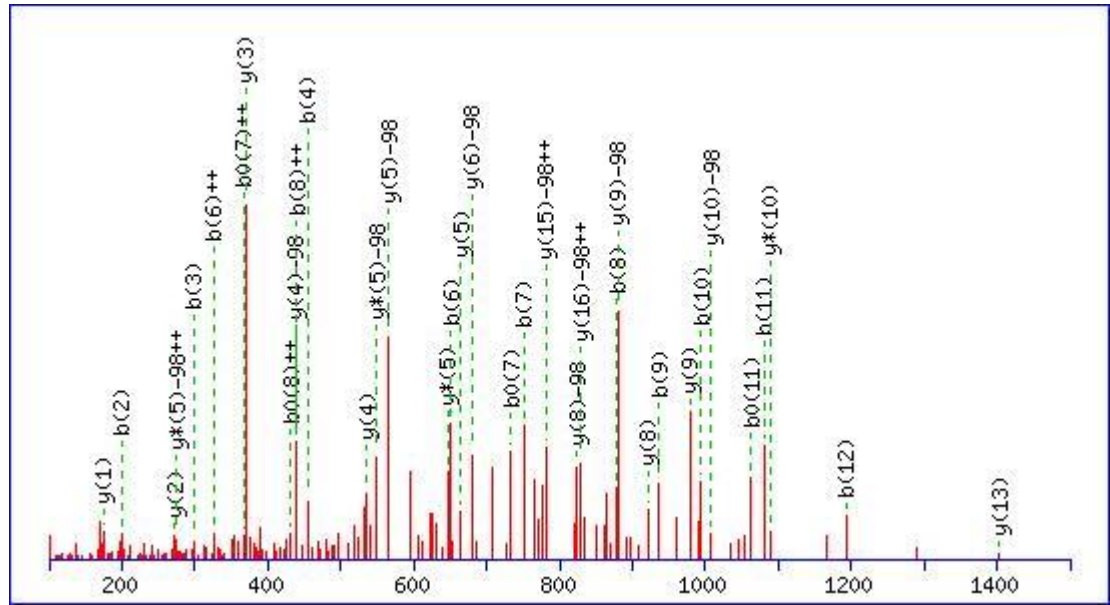

Monoisotopic mass of neutral peptide Mr(calc): 1855.9306

Variable modifications:

S14 : Phospho (ST), with neutral losses 0.0000(shown in table), 97.9769

Ions Score: 91 Expect: 2.2e-006

Matches : 36/276 fragment ions using 44 most intense peaks ([help](#))

| # | b        | b <sup>++</sup> | b <sup>*</sup> | b <sup>*++</sup> | b <sup>0</sup> | b <sup>0++</sup> | Seq | y        | y <sup>++</sup> | y <sup>*</sup> | y <sup>*++</sup> | y <sup>0</sup> | y <sup>0++</sup> | # |
|---|----------|-----------------|----------------|------------------|----------------|------------------|-----|----------|-----------------|----------------|------------------|----------------|------------------|---|
| 1 | 102.0550 | 51.5311         |                |                  | 84.0444        | 42.5258          | T   |          |                 |                |                  |                |                  | 1 |
| 2 | 199.1077 | 100.057         |                |                  | 181.0972       | 91.0522          | P   | 1755.890 | 878.448         | 1738.863       | 869.935          | 1737.879       | 869.443          | 1 |
|   |          | 5               |                |                  |                |                  |     | 2        | 7               | 6              | 4                | 6              | 4                | 6 |
| 3 | 298.1761 | 149.591         |                |                  | 280.1656       | 140.586          | V   | 1658.837 | 829.922         | 1641.810       | 821.409          | 1640.826       | 820.917          | 1 |
|   |          | 7               |                |                  |                | 4                |     | 4        | 3               | 8              | 1                | 8              | 1                | 5 |
| 4 | 454.2772 | 227.642         | 437.2507       | 219.129          | 436.2667       | 218.637          | R   | 1559.769 | 780.388         | 1542.742       | 771.874          | 1541.758       | 771.382          | 1 |
|   |          | 3               |                | 0                |                | 0                |     | 0        | 1               | 4              | 9                | 4              | 8                | 4 |
| 5 | 551.3300 | 276.168         | 534.3035       | 267.655          | 533.3194       | 267.163          | P   | 1403.667 | 702.337         | 1386.641       | 693.824          | 1385.657       | 693.332          | 1 |
|   |          | 6               |                | 4                |                | 4                |     | 9        | 6               | 3              | 3                | 3              | 3                | 3 |
| 6 | 650.3984 | 325.702         | 633.3719       | 317.189          | 632.3879       | 316.697          | V   | 1306.615 | 653.811         | 1289.588       | 645.297          | 1288.604       | 644.805          | 1 |
|   |          | 8               |                | 6                |                | 6                |     | 1        | 2               | 6              | 9                | 5              | 9                | 2 |
| 7 | 751.4461 | 376.226         | 734.4196       | 367.713          | 733.4355       | 367.221          | T   | 1207.546 | 604.277         | 1190.520       | 595.763          | 1189.536       | 595.271          | 1 |
|   |          | 7               |                | 4                |                | 4                |     | 7        | 0               | 1              | 7                | 1              | 7                | 1 |
| 8 | 879.5047 | 440.256         | 862.4781       | 431.742          | 861.4941       | 431.250          | Q   | 1106.499 | 553.753         | 1089.472       | 545.239          | 1088.488       | 544.747          | 1 |
|   |          | 0               |                | 7                |                | 7                |     | 0        | 1               | 5              | 9                | 5              | 9                | 0 |
| 9 | 936.5261 | 468.766         | 919.4996       | 460.253          | 918.5156       | 459.761          | G   | 978.4404 | 489.723         | 961.4139       | 481.210          | 960.4299       | 480.718          | 9 |
|   |          | 7               |                | 4                |                | 4                |     |          | 9               |                | 6                |                | 6                |   |

|    |           |          |           |          |           |          |   |          |          |          |          |          |          |   |
|----|-----------|----------|-----------|----------|-----------|----------|---|----------|----------|----------|----------|----------|----------|---|
| 10 | 993.5476  | 497.2774 | 976.5211  | 488.7642 | 975.5370  | 488.2722 | G | 921.4190 | 461.2131 | 904.3924 | 452.6999 | 903.4084 | 452.2078 | 8 |
| 11 | 1080.5796 | 540.7935 | 1063.5531 | 532.2802 | 1062.5691 | 531.7882 | S | 864.3975 | 432.7024 | 847.3710 | 424.1891 | 846.3869 | 423.6971 | 7 |
| 12 | 1193.6637 | 597.3355 | 1176.6372 | 588.8222 | 1175.6531 | 588.3302 | L | 777.3655 | 389.1864 | 760.3389 | 380.6731 | 759.3549 | 380.1811 | 6 |
| 13 | 1321.7223 | 661.3648 | 1304.6957 | 652.8515 | 1303.7117 | 652.3595 | Q | 664.2814 | 332.6443 | 647.2549 | 324.1311 | 646.2709 | 323.6391 | 5 |
| 14 | 1488.7206 | 744.8640 | 1471.6941 | 736.3507 | 1470.7101 | 735.8587 | S | 536.2228 | 268.6151 | 519.1963 | 260.1018 | 518.2123 | 259.6098 | 4 |
| 15 | 1585.7734 | 793.3903 | 1568.7469 | 784.8771 | 1567.7628 | 784.3851 | P | 369.2245 | 185.1159 | 352.1979 | 176.6026 |          |          | 3 |
| 16 | 1682.8262 | 841.9167 | 1665.7996 | 833.4034 | 1664.8156 | 832.9114 | P | 272.1717 | 136.5895 | 255.1452 | 128.0762 |          |          | 2 |
| 17 |           |          |           |          |           |          | R | 175.1190 | 88.0631  | 158.0924 | 79.5498  |          |          | 1 |

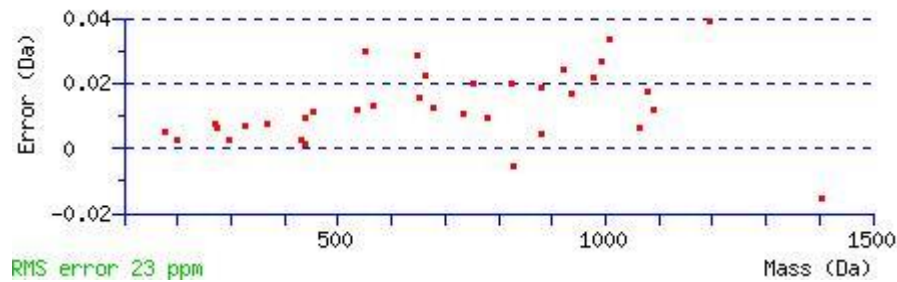

37\_MS/MS Fragmentation of **LYSVDAQGFLDKPGR**

Found in **O95180**, Voltage-dependent T-type calcium channel subunit alpha-1H OS=Homo sapiens GN=CACNA1H PE=1 SV=4

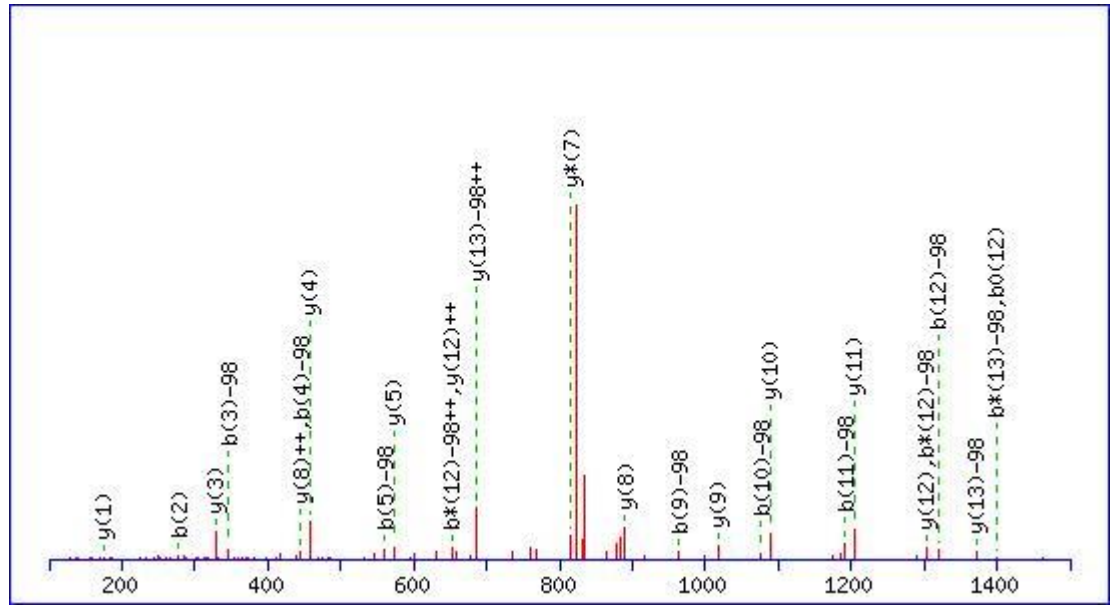

Monoisotopic mass of neutral peptide Mr(calc): 1744.8185

Variable modifications:

S3 : Phospho (ST), with neutral losses 97.9769(shown in table), 0.0000

Ions Score: 92 Expect: 1.8e-006

Matches : 26/220 fragment ions using 27 most intense peaks ([help](#))

| # | b        | b <sup>++</sup> | b <sup>*</sup> | b <sup>***</sup> | b <sup>0</sup> | b <sup>0++</sup> | Seq | y         | y <sup>++</sup> | y <sup>*</sup> | y <sup>***</sup> | y <sup>0</sup> | y <sup>0++</sup> | #  |
|---|----------|-----------------|----------------|------------------|----------------|------------------|-----|-----------|-----------------|----------------|------------------|----------------|------------------|----|
| 1 | 114.0913 | 57.5493         |                |                  |                |                  | L   |           |                 |                |                  |                |                  | 1  |
| 2 | 277.1547 | 139.0810        |                |                  |                |                  | Y   | 1534.7649 | 767.8861        | 1517.7383      | 759.3728         | 1516.7543      | 758.8808         | 14 |
| 3 | 346.1761 | 173.5917        |                |                  | 328.1656       | 164.5864         | S   | 1371.7015 | 686.3544        | 1354.6750      | 677.8411         | 1353.6910      | 677.3491         | 13 |
| 4 | 445.2445 | 223.1259        |                |                  | 427.2340       | 214.1206         | V   | 1302.6801 | 651.8437        | 1285.6535      | 643.3304         | 1284.6695      | 642.8384         | 12 |
| 5 | 560.2715 | 280.6394        |                |                  | 542.2609       | 271.6341         | D   | 1203.6117 | 602.3095        | 1186.5851      | 593.7962         | 1185.6011      | 593.3042         | 11 |
| 6 | 631.3086 | 316.1579        |                |                  | 613.2980       | 307.1527         | A   | 1088.5847 | 544.7960        | 1071.5582      | 536.2827         | 1070.5742      | 535.7907         | 10 |
| 7 | 759.3672 | 380.1872        | 742.3406       | 371.6740         | 741.3566       | 371.1819         | Q   | 1017.5476 | 509.2774        | 1000.5211      | 500.7642         | 999.5370       | 500.2722         | 9  |
| 8 | 816.3886 | 408.6980        | 799.3621       | 400.1847         | 798.3781       | 399.6927         | G   | 889.4890  | 445.2482        | 872.4625       | 436.7349         | 871.4785       | 436.2429         | 8  |
| 9 | 963.4571 | 482.2322        | 946.4305       | 473.7189         | 945.4465       | 473.2269         | F   | 832.4676  | 416.7374        | 815.4410       | 408.2241         | 814.4570       | 407.7321         | 7  |

|    |           |          |           |          |           |          |   |          |          |          |          |          |          |   |
|----|-----------|----------|-----------|----------|-----------|----------|---|----------|----------|----------|----------|----------|----------|---|
| 10 | 1076.5411 | 538.7742 | 1059.5146 | 530.2609 | 1058.5306 | 529.7689 | L | 685.3991 | 343.2032 | 668.3726 | 334.6899 | 667.3886 | 334.1979 | 6 |
| 11 | 1191.5681 | 596.2877 | 1174.5415 | 587.7744 | 1173.5575 | 587.2824 | D | 572.3151 | 286.6612 | 555.2885 | 278.1479 | 554.3045 | 277.6559 | 5 |
| 12 | 1319.6630 | 660.3352 | 1302.6365 | 651.8219 | 1301.6525 | 651.3299 | K | 457.2881 | 229.1477 | 440.2616 | 220.6344 |          |          | 4 |
| 13 | 1416.7158 | 708.8615 | 1399.6892 | 700.3483 | 1398.7052 | 699.8563 | P | 329.1932 | 165.1002 | 312.1666 | 156.5870 |          |          | 3 |
| 14 | 1473.7373 | 737.3723 | 1456.7107 | 728.8590 | 1455.7267 | 728.3670 | G | 232.1404 | 116.5738 | 215.1139 | 108.0606 |          |          | 2 |
| 15 |           |          |           |          |           |          | R | 175.1190 | 88.0631  | 158.0924 | 79.5498  |          |          | 1 |

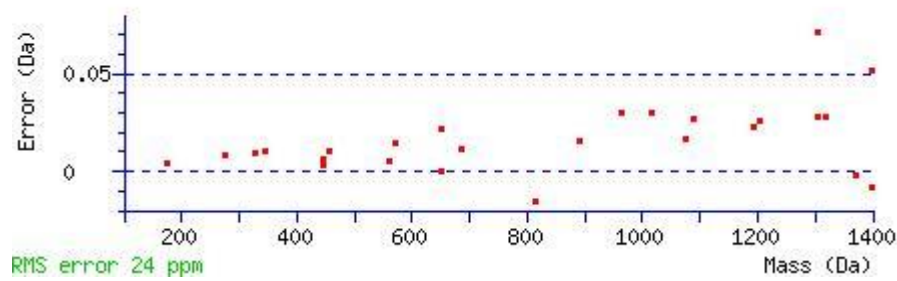

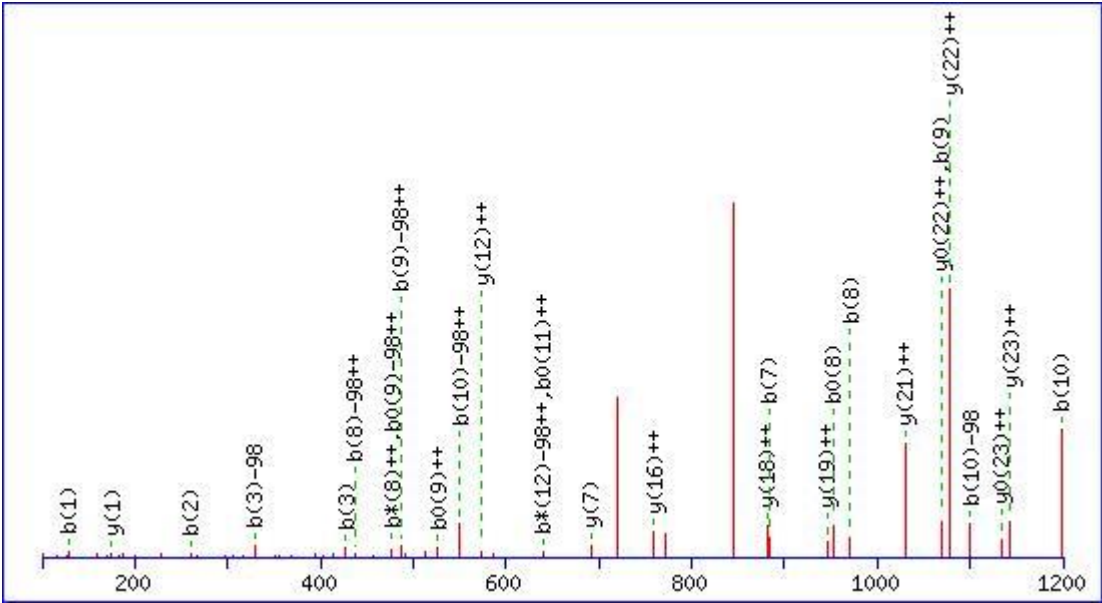

Monoisotopic mass of neutral peptide Mr(calc): 3352.4774

Variable modifications:

S3 : Phospho (ST), with neutral losses 0.0000(shown in table), 97.9769

C6 : Methylthio (C)

Ions Score: 42 Expect: 0.26

Matches : 29/550 fragment ions using 43 most intense peaks ([help](#))

| # | b             | b <sup>++</sup> | b <sup>*</sup> | b <sup>+++</sup> | b <sup>0</sup> | b <sup>0++</sup> | Seq | y             | y <sup>++</sup> | y <sup>*</sup> | y <sup>+++</sup> | y <sup>0</sup> | y <sup>0++</sup> | #      |
|---|---------------|-----------------|----------------|------------------|----------------|------------------|-----|---------------|-----------------|----------------|------------------|----------------|------------------|--------|
| 1 | 129.102<br>2  | 65.0548         | 112.075<br>7   | 56.5415          |                |                  | K   |               |                 |                |                  |                |                  | 3<br>2 |
| 2 | 260.142<br>7  | 130.575<br>0    | 243.116<br>2   | 122.061<br>7     |                |                  | M   | 3225.38<br>98 | 1613.19<br>85   | 3208.36<br>33  | 1604.68<br>53    | 3207.37<br>92  | 1604.19<br>33    | 3<br>1 |
| 3 | 427.141<br>1  | 214.074<br>2    | 410.114<br>5   | 205.560<br>9     | 409.130<br>5   | 205.068<br>9     | S   | 3094.34<br>93 | 1547.67<br>83   | 3077.32<br>28  | 1539.16<br>50    | 3076.33<br>88  | 1538.67<br>30    | 3<br>0 |
| 4 | 524.193<br>8  | 262.600<br>6    | 507.167<br>3   | 254.087<br>3     | 506.183<br>3   | 253.595<br>3     | P   | 2927.35<br>10 | 1464.17<br>91   | 2910.32<br>44  | 1455.66<br>58    | 2909.34<br>04  | 1455.17<br>38    | 2<br>9 |
| 5 | 621.246<br>6  | 311.126<br>9    | 604.220<br>1   | 302.613<br>7     | 603.236<br>0   | 302.121<br>7     | P   | 2830.29<br>82 | 1415.65<br>27   | 2813.27<br>17  | 1407.13<br>95    | 2812.28<br>76  | 1406.64<br>75    | 2<br>8 |
| 6 | 770.243<br>5  | 385.625<br>4    | 753.217<br>0   | 377.112<br>1     | 752.233<br>0   | 376.620<br>1     | C   | 2733.24<br>54 | 1367.12<br>64   | 2716.21<br>89  | 1358.61<br>31    | 2715.23<br>49  | 1358.12<br>11    | 2<br>7 |
| 7 | 883.327<br>6  | 442.167<br>4    | 866.301<br>0   | 433.654<br>2     | 865.317<br>0   | 433.162<br>1     | I   | 2584.24<br>85 | 1292.62<br>79   | 2567.22<br>20  | 1284.11<br>46    | 2566.23<br>80  | 1283.62<br>26    | 2<br>6 |
| 8 | 970.359<br>6  | 485.683<br>4    | 953.333<br>1   | 477.170<br>2     | 952.349<br>0   | 476.678<br>2     | S   | 2471.16<br>45 | 1236.08<br>59   | 2454.13<br>79  | 1227.57<br>26    | 2453.15<br>39  | 1227.08<br>06    | 2<br>5 |
| 9 | 1069.42<br>80 | 535.217<br>6    | 1052.40<br>15  | 526.704<br>4     | 1051.41<br>75  | 526.212<br>4     | V   | 2384.13<br>24 | 1192.56<br>99   | 2367.10<br>59  | 1184.05<br>66    | 2366.12<br>19  | 1183.56<br>46    | 2<br>4 |

|           |                  |           |           |           |           |                 |          |                 |                  |           |           |           |                  |           |
|-----------|------------------|-----------|-----------|-----------|-----------|-----------------|----------|-----------------|------------------|-----------|-----------|-----------|------------------|-----------|
| <b>10</b> | <b>1198.4706</b> | 599.7389  | 1181.4441 | 591.2257  | 1180.4601 | 590.7337        | <b>E</b> | 2285.0640       | <b>1143.0356</b> | 2268.0375 | 1134.5224 | 2267.0535 | <b>1134.0304</b> | <b>23</b> |
| <b>11</b> | 1295.5234        | 648.2653  | 1278.4968 | 639.7521  | 1277.5128 | <b>639.2600</b> | <b>P</b> | 2156.0214       | <b>1078.5144</b> | 2138.9949 | 1070.0011 | 2138.0109 | <b>1069.5091</b> | <b>22</b> |
| <b>12</b> | 1392.5761        | 696.7917  | 1375.5496 | 688.2784  | 1374.5656 | 687.7864        | <b>P</b> | 2058.9687       | <b>1029.9880</b> | 2041.9421 | 1021.4747 | 2040.9581 | 1020.9827        | <b>21</b> |
| <b>13</b> | 1463.6133        | 732.3103  | 1446.5867 | 723.7970  | 1445.6027 | 723.3050        | <b>A</b> | 1961.9159       | 981.4616         | 1944.8894 | 972.9483  | 1943.9053 | 972.4563         | <b>20</b> |
| <b>14</b> | 1592.6559        | 796.8316  | 1575.6293 | 788.3183  | 1574.6453 | 787.8263        | <b>E</b> | 1890.8788       | <b>945.9430</b>  | 1873.8522 | 937.4298  | 1872.8682 | 936.9378         | <b>19</b> |
| <b>15</b> | 1707.6828        | 854.3450  | 1690.6562 | 845.8318  | 1689.6722 | 845.3398        | <b>D</b> | 1761.8362       | <b>881.4217</b>  | 1744.8096 | 872.9085  | 1743.8256 | 872.4165         | <b>18</b> |
| <b>16</b> | 1836.7254        | 918.8663  | 1819.6988 | 910.3531  | 1818.7148 | 909.8610        | <b>E</b> | 1646.8093       | 823.9083         | 1629.7827 | 815.3950  | 1628.7987 | 814.9030         | <b>17</b> |
| <b>17</b> | 1893.7469        | 947.3771  | 1876.7203 | 938.8638  | 1875.7363 | 938.3718        | <b>G</b> | 1517.7667       | <b>759.3870</b>  | 1500.7401 | 750.8737  | 1499.7561 | 750.3817         | <b>16</b> |
| <b>18</b> | 1980.7789        | 990.8931  | 1963.7523 | 982.3798  | 1962.7683 | 981.8878        | <b>S</b> | 1460.7452       | 730.8762         | 1443.7186 | 722.3630  | 1442.7346 | 721.8710         | <b>15</b> |
| <b>19</b> | 2051.8160        | 1026.4116 | 2034.7894 | 1017.8984 | 2033.8054 | 1017.4064       | <b>A</b> | 1373.7132       | 687.3602         | 1356.6866 | 678.8469  | 1355.7026 | 678.3549         | <b>14</b> |
| <b>20</b> | 2207.9171        | 1104.4622 | 2190.8906 | 1095.9489 | 2189.9065 | 1095.4569       | <b>R</b> | 1302.6761       | 651.8417         | 1285.6495 | 643.3284  | 1284.6655 | 642.8364         | <b>13</b> |
| <b>21</b> | 2304.9699        | 1152.9886 | 2287.9433 | 1144.4753 | 2286.9593 | 1143.9833       | <b>P</b> | 1146.5749       | <b>573.7911</b>  | 1129.5484 | 565.2778  | 1128.5644 | 564.7858         | <b>12</b> |
| <b>22</b> | 2392.0019        | 1196.5046 | 2374.9753 | 1187.9913 | 2373.9913 | 1187.4993       | <b>S</b> | 1049.5222       | 525.2647         | 1032.4956 | 516.7515  | 1031.5116 | 516.2594         | <b>11</b> |
| <b>23</b> | 2463.0390        | 1232.0231 | 2446.0125 | 1223.5099 | 2445.0284 | 1223.0179       | <b>A</b> | 962.4902        | 481.7487         | 945.4636  | 473.2354  | 944.4796  | 472.7434         | <b>10</b> |
| <b>24</b> | 2534.0761        | 1267.5417 | 2517.0496 | 1259.0284 | 2516.0656 | 1258.5364       | <b>A</b> | 891.4530        | 446.2302         | 874.4265  | 437.7169  | 873.4425  | 437.2249         | <b>9</b>  |
| <b>25</b> | 2663.1187        | 1332.0630 | 2646.0922 | 1323.5497 | 2645.1082 | 1323.0577       | <b>E</b> | 820.4159        | 410.7116         | 803.3894  | 402.1983  | 802.4054  | 401.7063         | <b>8</b>  |
| <b>26</b> | 2720.1402        | 1360.5737 | 2703.1136 | 1352.0605 | 2702.1296 | 1351.5684       | <b>G</b> | <b>691.3733</b> | 346.1903         | 674.3468  | 337.6770  | 673.3628  | 337.1850         | <b>7</b>  |
| <b>27</b> | 2777.1616        | 1389.0845 | 2760.1351 | 1380.5712 | 2759.1511 | 1380.0792       | <b>G</b> | 634.3519        | 317.6796         | 617.3253  | 309.1663  | 616.3413  | 308.6743         | <b>6</b>  |
| <b>28</b> | 2864.1937        | 1432.6005 | 2847.1671 | 1424.0872 | 2846.1831 | 1423.5952       | <b>S</b> | 577.3304        | 289.1688         | 560.3039  | 280.6556  | 559.3198  | 280.1636         | <b>5</b>  |

|                                                         |                                                                                                                |                                                                                                                |                                                                                                                |                                                                                                                |                                                                                                                |                                                                                                                |                                                     |                                                                                                                     |                                                                                                                    |                                                                                                                     |                                                                                                                    |                                                                                                     |                                                                                                     |                                                     |
|---------------------------------------------------------|----------------------------------------------------------------------------------------------------------------|----------------------------------------------------------------------------------------------------------------|----------------------------------------------------------------------------------------------------------------|----------------------------------------------------------------------------------------------------------------|----------------------------------------------------------------------------------------------------------------|----------------------------------------------------------------------------------------------------------------|-----------------------------------------------------|---------------------------------------------------------------------------------------------------------------------|--------------------------------------------------------------------------------------------------------------------|---------------------------------------------------------------------------------------------------------------------|--------------------------------------------------------------------------------------------------------------------|-----------------------------------------------------------------------------------------------------|-----------------------------------------------------------------------------------------------------|-----------------------------------------------------|
| <div>29</div> <div>30</div> <div>31</div> <div>32</div> | <div>2965.24</div> <div>14</div> <div>3066.28</div> <div>90</div> <div>3179.37</div> <div>31</div> <div></div> | <div>1483.12</div> <div>43</div> <div>1533.64</div> <div>82</div> <div>1590.19</div> <div>02</div> <div></div> | <div>2948.21</div> <div>48</div> <div>3049.26</div> <div>25</div> <div>3162.34</div> <div>65</div> <div></div> | <div>1474.61</div> <div>10</div> <div>1525.13</div> <div>49</div> <div>1581.67</div> <div>69</div> <div></div> | <div>2947.23</div> <div>08</div> <div>3048.27</div> <div>85</div> <div>3161.36</div> <div>25</div> <div></div> | <div>1474.11</div> <div>90</div> <div>1524.64</div> <div>29</div> <div>1581.18</div> <div>49</div> <div></div> | <div>T</div> <div>T</div> <div>L</div> <div>R</div> | <div>490.298</div> <div>4</div> <div>389.250</div> <div>7</div> <div>288.203</div> <div>0</div> <div>175.1190</div> | <div>245.652</div> <div>8</div> <div>195.129</div> <div>0</div> <div>144.605</div> <div>1</div> <div>88.0631</div> | <div>473.271</div> <div>8</div> <div>372.224</div> <div>1</div> <div>271.176</div> <div>5</div> <div>158.0924</div> | <div>237.139</div> <div>6</div> <div>186.615</div> <div>7</div> <div>136.091</div> <div>9</div> <div>79.5498</div> | <div>472.287</div> <div>8</div> <div>371.240</div> <div>1</div> <div></div> <div></div> <div></div> | <div>236.647</div> <div>5</div> <div>186.123</div> <div>7</div> <div></div> <div></div> <div></div> | <div>4</div> <div>3</div> <div>2</div> <div>1</div> |
|---------------------------------------------------------|----------------------------------------------------------------------------------------------------------------|----------------------------------------------------------------------------------------------------------------|----------------------------------------------------------------------------------------------------------------|----------------------------------------------------------------------------------------------------------------|----------------------------------------------------------------------------------------------------------------|----------------------------------------------------------------------------------------------------------------|-----------------------------------------------------|---------------------------------------------------------------------------------------------------------------------|--------------------------------------------------------------------------------------------------------------------|---------------------------------------------------------------------------------------------------------------------|--------------------------------------------------------------------------------------------------------------------|-----------------------------------------------------------------------------------------------------|-----------------------------------------------------------------------------------------------------|-----------------------------------------------------|

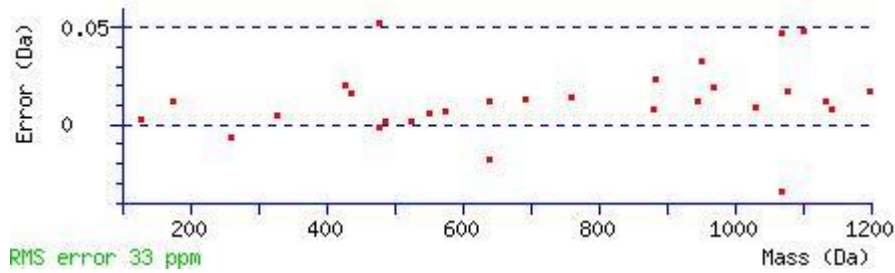

39\_MS/MS Fragmentation of **RTPSCEATPHR**

Found in **O95180**, Voltage-dependent T-type calcium channel subunit alpha-1H OS=Homo sapiens GN=CACNA1H PE=1 SV=4

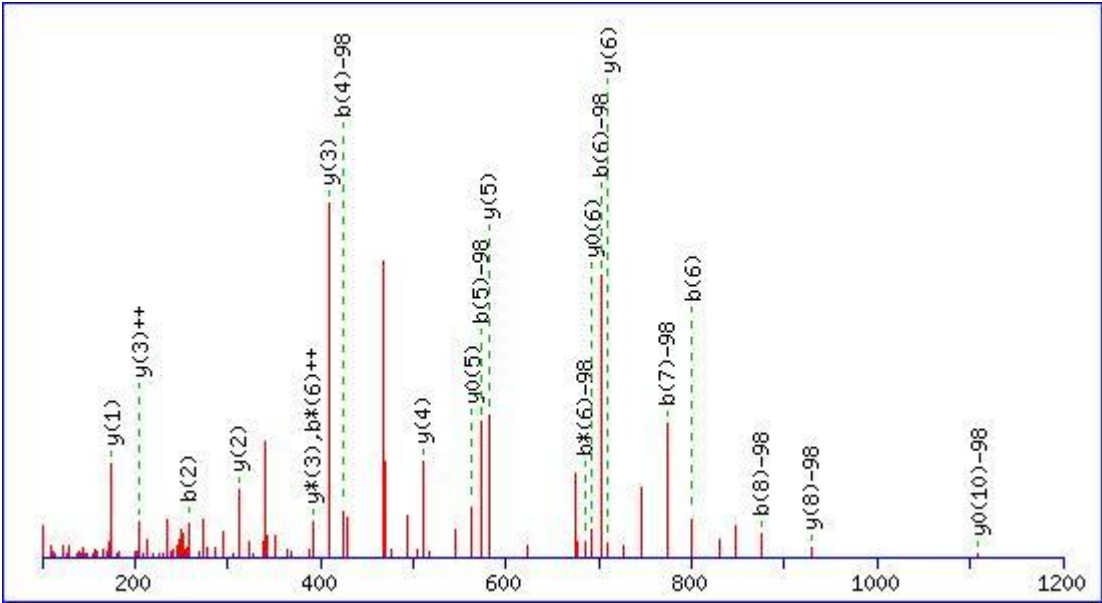

Monoisotopic mass of neutral peptide Mr(calc): 1379.5475

Variable modifications:

S4 : Phospho (ST), with neutral losses 97.9769(shown in table), 0.0000

C5 : Methylthio (C)

Ions Score: 46 Expect: 0.036

Matches : 22/172 fragment ions using 34 most intense peaks ([help](#))

| # | b        | b <sup>++</sup> | b <sup>*</sup> | b <sup>+++</sup> | b <sup>0</sup> | b <sup>0++</sup> | Seq | y             | y <sup>++</sup> | y <sup>*</sup> | y <sup>+++</sup> | y <sup>0</sup> | y <sup>0++</sup> | #  |
|---|----------|-----------------|----------------|------------------|----------------|------------------|-----|---------------|-----------------|----------------|------------------|----------------|------------------|----|
| 1 | 157.1084 | 79.0578         | 140.0818       | 70.5446          |                |                  | R   |               |                 |                |                  |                |                  | 1  |
| 2 | 258.1561 | 129.581<br>7    | 241.1295       | 121.068<br>4     | 240.1455       | 120.576<br>4     | T   | 1126.476<br>8 | 563.742<br>1    | 1109.450<br>3  | 555.228<br>8     | 1108.466<br>3  | 554.736<br>8     | 10 |
| 3 | 355.2088 | 178.108<br>1    | 338.1823       | 169.594<br>8     | 337.1983       | 169.102<br>8     | P   | 1025.429<br>1 | 513.218<br>2    | 1008.402<br>6  | 504.704<br>9     | 1007.418<br>6  | 504.212<br>9     | 9  |
| 4 | 424.2303 | 212.618<br>8    | 407.2037       | 204.105<br>5     | 406.2197       | 203.613<br>5     | S   | 928.3764      | 464.691<br>8    | 911.3498       | 456.178<br>6     | 910.3658       | 455.686<br>5     | 8  |
| 5 | 573.2272 | 287.117<br>2    | 556.2006       | 278.604<br>0     | 555.2166       | 278.112<br>0     | C   | 859.3549      | 430.181<br>1    | 842.3284       | 421.667<br>8     | 841.3444       | 421.175<br>8     | 7  |
| 6 | 702.2698 | 351.638<br>5    | 685.2432       | 343.125<br>3     | 684.2592       | 342.633<br>3     | E   | 710.3580      | 355.682<br>6    | 693.3315       | 347.169<br>4     | 692.3474       | 346.677<br>4     | 6  |
| 7 | 773.3069 | 387.157<br>1    | 756.2804       | 378.643<br>8     | 755.2963       | 378.151<br>8     | A   | 581.3154      | 291.161<br>3    | 564.2889       | 282.648<br>1     | 563.3049       | 282.156<br>1     | 5  |
| 8 | 874.3546 | 437.680<br>9    | 857.3280       | 429.167<br>7     | 856.3440       | 428.675<br>6     | T   | 510.2783      | 255.642<br>8    | 493.2518       | 247.129<br>5     | 492.2677       | 246.637<br>5     | 4  |
| 9 | 971.4073 | 486.207<br>3    | 954.3808       | 477.694<br>0     | 953.3968       | 477.202<br>0     | P   | 409.2306      | 205.119<br>0    | 392.2041       | 196.605<br>7     |                |                  | 3  |

|   |          |         |          |         |          |         |   |          |         |          |         |  |  |   |
|---|----------|---------|----------|---------|----------|---------|---|----------|---------|----------|---------|--|--|---|
| 1 | 1108.466 | 554.736 | 1091.439 | 546.223 | 1090.455 | 545.731 | H | 312.1779 | 156.592 | 295.1513 | 148.079 |  |  | 2 |
| 0 | 3        | 8       | 7        | 5       | 7        | 5       |   |          | 6       |          | 3       |  |  |   |
| 1 |          |         |          |         |          |         | R | 175.1190 | 88.0631 | 158.0924 | 79.5498 |  |  | 1 |
| 1 |          |         |          |         |          |         |   |          |         |          |         |  |  |   |

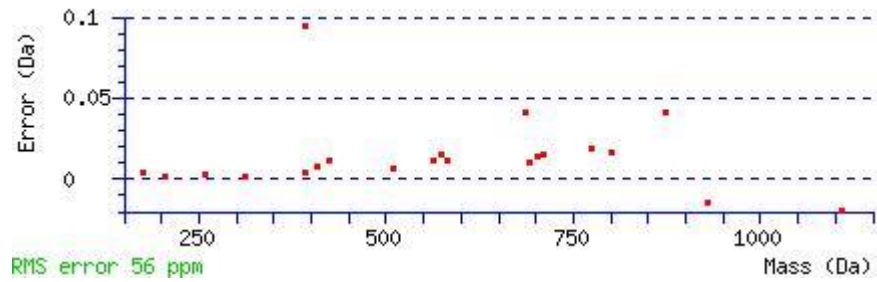

Supplement: Supplementary file 1 [file supplementary]
